# Supplementary material for: A Conserved Pattern of Primer-Dependent Transcription Initiation in Escherichia coli and Vibrio cholerae Revealed by 5′ RNA-seq
Source: PLoS Genet. 2015 Jul 1;11(7):e1005348. doi: 10.1371/journal.pgen.1005348 (PMC4488433; doi:10.1371/journal.pgen.1005348)
Supplement: S6 Table — Percentage of transcripts emanating from position −1 of uTSRs (S5 Table) with the indicated sequence at −1 and +1 in cells carrying wild-type concentrations of 2- to ~4-nt RNAs (wild-type) or cells in which the oligoribonuclease NrnB was ectopically expressed (Nrn). The Nrn effect represents the difference in these values. The total number of uTSRs used to calculate the percentages is indicated. Values are calculated from biological replicates listed in S5 Table. Data is derived from the analysis of all 5′ ends during stationary phase. uTSRs with above average Nrn effect are highlighted in black. (XLSX) [file pgen.1005348.s007.xlsx]

## Sheet: Sheet1
Table S6. Analysis of PDI using the prior 5′ RNA-seq protocol (see Vvedenskaya et al., 2012).
Class	Seq. at –1/+1	# uTSRs	% ppp 5' ends at –1		Nrn effect
			wt	Nrn
Total	NN	233	7.01204	2.82046	4.19158
+1A	TA	48	16.5804	2.49636	14.0841
	GA	12	5.83106	2.06538	3.76568
	CA	43	3.16527	1.88087	1.2844
	AA	10	5.54225	5.45364	0.0886107
+1G	GG	11	7.25509	5.11715	2.13794
	CG	29	6.22862	4.52974	1.69887
	TG	47	3.13628	2.0928	1.04348
	AG	9	6.95719	6.28951	0.667675
Percentage of transcripts emanating from position –1 of uTSRs (S5 Table) with the indicated sequence at –1 and +1 in cells carrying wild-type concentrations of 2- to ~4-nt RNAs (wild-type) or cells in which the oligoribonuclease NrnB was ectopically expressed (Nrn). The Nrn effect represents the difference in these values. The total number of uTSRs used to calculate the percentages is indicated. …
