# Supplementary material for: A Conserved Pattern of Primer-Dependent Transcription Initiation in Escherichia coli and Vibrio cholerae Revealed by 5′ RNA-seq
Source: PLoS Genet. 2015 Jul 1;11(7):e1005348. doi: 10.1371/journal.pgen.1005348 (PMC4488433; doi:10.1371/journal.pgen.1005348)
Supplement: S8 Table — Analysis of transcripts isolated during the late stationary phase of growth from E. coli cells harboring plasmid pPSV38 (wt) or pNrnB-VSVG (+Nrn). Shown for each start site region is: the promoter sequence extending from positions −40 to +4, the sequence at positions −1 and +1, the genome coordinate of position +1, the gene nearest to +1, the distance of +1 to the nearest gene (note that “–”indicates that +1 is upstream of the gene), and the percentage of reads emanating from position +1 in the analysis of 5' triphosphate ends (% at +1). Read counts derived from the analysis of all 5' ends (5′ all) or 5' triphosphate ends (5′ ppp) are shown. (XLSX) [file pgen.1005348.s009.xlsx]

## Sheet: Sheet1
Table S8. Analysis of primer-dependent initiation in E. coli by 5′ RNA-seq: data for uTSRs during late stationary phase. Analysis of transcripts isolated during the late stationary phase of growth from E. coli cells harboring plasmid pPSV38 (wt) or pNrnB-VSVG (+Nrn). Shown for each start site region is: the promoter sequence extending from positions –40 to +4, the sequence at positions –1 and +1,…
								Read count						% of total
								5' all				5' ppp		5' all				5' ppp
								wt		+NrnB		wt		wt		+NrnB		wt
Promoter Sequence (-40 to +4)	-1/+1	Genome Coordinate	Gene	Dist. to gene	% at +1			#1	#2	#1	#2	#1	#2	#1	#2	#1	#2	#1	#2
ttgtttgcatatttttaacacaaaatacacacttcgactcAtct	cA	4031013 (-)	fadB (b3846)	-42	97.8869	c	-3	0	0	0	0	0	0	0	0	0	0	0	0
						t	-2	3	1	2	0	5	5	0.232558	0.105597	0.176991	0	0.0298936	0.0303196
						c	-1	4	6	5	3	24	41	0.310078	0.63358	0.442478	0.229183	0.143489	0.24862
						A	+1	1262	915	1102	1284	16366	16149	97.8295	96.6209	97.5221	98.0901	97.8477	97.9261
						t	+2	17	22	18	21	300	276	1.31783	2.32313	1.59292	1.60428	1.79361	1.67364
						c	+3	4	2	3	1	27	13	0.310078	0.211193	0.265487	0.0763942	0.161425	0.0788309
						t	+4	0	1	0	0	4	7	0	0.105597	0	0	0.0239149	0.0424474
ttacaggcagaaatgcgtgatgtgtgccacacttgttgacGtta	cG	475306 (+)	ybaY (b0453)	-73	97.833	g	-3	0	0	0	0	0	0	0	0	0	0	0	0
						a	-2	4	2	1	2	5	4	1.04987	0.687285	0.636943	2.1978	0.17838	0.149142
						c	-1	1	3	0	0	2	1	0.262467	1.03093	0	0	0.0713521	0.0372856
						G	+1	365	280	152	86	2739	2627	95.8005	96.2199	96.8153	94.5055	97.7167	97.9493
						t	+2	9	3	2	2	49	43	2.3622	1.03093	1.27389	2.1978	1.74813	1.60328
						t	+3	1	3	2	1	7	7	0.262467	1.03093	1.27389	1.0989	0.249732	0.260999
						a	+4	1	0	0	0	1	0	0.262467	0	0	0	0.0356761	0
tcgtgttggattattctgcatttttggggagaatggacttGccg	tG	2312828 (-)	ompC (b2215)	-79	97.758	c	-3	0	0	1	0	1	0	0	0	0.362319	0	0.0727273	0
						t	-2	0	0	2	1	0	0	0	0	0.724638	0.333333	0	0
						t	-1	1	1	0	0	1	2	0.657895	1.13636	0	0	0.0727273	0.174978
						G	+1	147	86	270	293	1335	1125	96.7105	97.7273	97.8261	97.6667	97.0909	98.4252
						c	+2	4	1	3	4	36	14	2.63158	1.13636	1.08696	1.33333	2.61818	1.22485
						c	+3	0	0	0	1	1	2	0	0	0	0.333333	0.0727273	0.174978
						g	+4	0	0	0	1	1	0	0	0	0	0.333333	0.0727273	0
agaatttggtgaagtggatatcctggtcaataatgccggtAtca	tA	1150934 (+)	fabG (b1093)	264	97.7396	g	-3	0	0	0	0	0	0	0	0	0	0	0	0
						g	-2	0	1	0	0	0	0	0	1.47059	0	0	0	0
						t	-1	5	3	0	0	0	0	5.61798	4.41176	0	0	0	0
						A	+1	81	59	73	69	750	674	91.0112	86.7647	96.0526	98.5714	97.6562	97.8229
						t	+2	2	4	1	1	18	14	2.24719	5.88235	1.31579	1.42857	2.34375	2.03193
						c	+3	0	1	2	0	0	1	0	1.47059	2.63158	0	0	0.145138
						a	+4	1	0	0	0	0	0	1.1236	0	0	0	0	0
ggcgtcttgaaaactgttgaaaagaccacacgtactttacAact	cA	921911 (+)	clpS (b0881)	-1002	97.7283	t	-3	0	0	0	0	0	0	0	0	0	0	0	0
						a	-2	0	0	0	0	0	0	0	0	0	0	0	0
						c	-1	0	0	0	1	0	0	0	0	0	0.1321	0	0
						A	+1	116	69	382	730	578	902	97.479	95.8333	95.9799	96.4333	97.3064	98.1502
						a	+2	1	3	15	18	14	16	0.840336	4.16667	3.76884	2.37781	2.3569	1.74102
						c	+3	2	0	0	5	1	1	1.68067	0	0	0.660502	0.16835	0.108814
						t	+4	0	0	1	3	1	0	0	0	0.251256	0.396301	0.16835	0
accaatttcaattgctgtcatataactttacactgtcgttGtta	tG	2266214 (+)	yeiQ (b2172)	-31	97.7193	g	-3	0	0	1	0	1	1	0	0	0.75188	0	0.176056	0.103306
						t	-2	2	0	0	0	0	0	2.08333	0	0	0	0	0
						t	-1	5	7	0	0	0	0	5.20833	9.09091	0	0	0	0
						G	+1	83	68	128	160	555	946	86.4583	88.3117	96.2406	91.4286	97.7113	97.7273
						t	+2	4	1	2	6	10	16	4.16667	1.2987	1.50376	3.42857	1.76056	1.65289
						t	+3	0	1	1	3	2	2	0	1.2987	0.75188	1.71429	0.352113	0.206612
						a	+4	2	0	1	6	0	3	2.08333	0	0.75188	3.42857	0	0.309917
ccttcgtacgaaatgatcgtattgaagctatacttttaacAtcg	cA	4126952 (+)	rpmE (b3936)	-61	97.6986	a	-3	1	0	1	1	0	0	0.487805	0	0.775194	1.1236	0	0
						a	-2	0	1	0	1	1	0	0	1.04167	0	1.1236	0.045106	0
						c	-1	0	0	0	0	1	0	0	0	0	0	0.045106	0
						A	+1	203	93	127	85	2170	2985	99.0244	96.875	98.4496	95.5056	97.88	97.5172
						t	+2	1	1	1	1	43	69	0.487805	1.04167	0.775194	1.1236	1.93956	2.25417
						c	+3	0	1	0	0	2	5	0	1.04167	0	0	0.090212	0.163345
						g	+4	0	0	0	1	0	2	0	0	0	1.1236	0	0.0653381
ccggttcaaacatcatgggattctgtggtaaacttctcgcGatt	cG	2618805 (-)	hda (b2496)	-29	97.6885	c	-3	0	0	0	0	0	0	0	0	0	0	0	0
						g	-2	0	0	0	0	0	0	0	0	0	0	0	0
						c	-1	0	2	0	0	0	0	0	3.44828	0	0	0	0
						G	+1	93	48	66	148	351	461	94.898	82.7586	94.2857	94.8718	97.5	97.8769
						a	+2	3	4	1	5	7	9	3.06122	6.89655	1.42857	3.20513	1.94444	1.91083
						t	+3	1	2	1	2	0	1	1.02041	3.44828	1.42857	1.28205	0	0.212314
						t	+4	1	2	2	1	2	0	1.02041	3.44828	2.85714	0.641026	0.555556	0
ttacactggcgaagaaacgtcggtgacatacaattaaagcAtca	cA	4278066 (-)	ryjA (b4459)	0	97.6717	a	-3	1	1	2	0	0	1	0.226244	0.167785	0.183486	0	0	0.0161786
						g	-2	1	0	0	0	5	2	0.226244	0	0	0	0.0609162	0.0323572
						c	-1	1	1	1	0	22	4	0.226244	0.167785	0.0917431	0	0.268031	0.0647144
						A	+1	432	582	1062	1350	8021	6034	97.7376	97.651	97.4312	98.1105	97.7217	97.6217
						t	+2	5	9	17	16	127	110	1.13122	1.51007	1.55963	1.16279	1.54727	1.77965
						c	+3	0	0	2	4	19	18	0	0	0.183486	0.290698	0.231481	0.291215
						a	+4	2	3	6	6	14	12	0.452489	0.503356	0.550459	0.436047	0.170565	0.194143
cgactggacagttaaccgattcagtgccagatttcgcagtAtct	tA	3772189 (+)	mtlA (b3599)	-92	97.6484	a	-3	1	0	0	0	0	0	1.44928	0	0	0	0	0
						g	-2	0	0	0	1	0	0	0	0	0	1.42857	0	0
						t	-1	8	3	0	0	0	0	11.5942	5.55556	0	0	0	0
						A	+1	58	49	55	68	174	144	84.058	90.7407	96.4912	97.1429	96.6667	98.6301
						t	+2	1	0	1	1	5	2	1.44928	0	1.75439	1.42857	2.77778	1.36986
						c	+3	1	2	1	0	1	0	1.44928	3.7037	1.75439	0	0.555556	0
						t	+4	0	0	0	0	0	0	0	0	0	0	0	0
attttctgaactctttcttcccaggcgagtctgagtatatGaaa	tG	2814802 (+)	micA (b4442)	0	97.6435	t	-3	1	0	0	0	0	0	0.431034	0	0	0	0	0
						a	-2	0	0	0	0	0	0	0	0	0	0	0	0
						t	-1	1	7	1	1	0	1	0.431034	2.38908	0.242718	0.507614	0	0.0530504
						G	+1	222	259	399	184	1324	1842	95.6897	88.3959	96.8447	93.401	97.5682	97.7188
						a	+2	8	24	9	9	30	33	3.44828	8.19113	2.18447	4.56853	2.21076	1.75066
						a	+3	0	1	2	3	3	7	0	0.341297	0.485437	1.52284	0.221076	0.371353
						a	+4	0	2	1	0	0	2	0	0.682594	0.242718	0	0	0.106101
gaatatttactgccatttcattcacgtctattcttaatttGctg	tG	3252263 (+)	yhaH (b3103)	-41	97.6309	t	-3	0	0	0	0	0	0	0	0	0	0	0	0
						t	-2	1	0	0	0	0	0	0.729927	0	0	0	0	0
						t	-1	3	3	0	0	1	3	2.18978	3.2967	0	0	0.0755287	0.287632
						G	+1	128	86	75	66	1293	1018	93.4307	94.5055	97.4026	94.2857	97.6586	97.6031
						c	+2	5	2	2	3	25	20	3.64964	2.1978	2.5974	4.28571	1.88822	1.91755
						t	+3	0	0	0	1	5	1	0	0	0	1.42857	0.377644	0.0958773
						g	+4	0	0	0	0	0	1	0	0	0	0	0	0.0958773
atgcgttgctgccgctaatcattagcgttatagtgaatccGctt	cG	3184718 (-)	ribB (b3041)	-252	97.6153	t	-3	0	0	0	0	0	0	0	0	0	0	0	0
						c	-2	0	0	0	0	0	0	0	0	0	0	0	0
						c	-1	0	1	0	0	0	0	0	0.487805	0	0	0	0
						G	+1	210	188	159	231	2785	1981	95.0226	91.7073	96.9512	95.8506	97.5482	97.6824
						c	+2	7	9	4	5	65	43	3.16742	4.39024	2.43902	2.07469	2.27671	2.12032
						t	+3	4	7	1	4	3	4	1.80995	3.41463	0.609756	1.65975	0.105079	0.197239
						t	+4	0	0	0	1	2	0	0	0	0	0.414938	0.0700525	0
tcttaacaacgaagcggcaaatatttgccatgctgaatgtGctt	tG	1556339 (-)	bdm (b1481)	-59	97.5007	t	-3	0	0	0	0	0	0	0	0	0	0	0	0
						g	-2	0	0	0	0	1	4	0	0	0	0	0.0226912	0.0796972
						t	-1	0	0	0	0	1	2	0	0	0	0	0.0226912	0.0398486
						G	+1	250	266	170	218	4307	4882	82.5083	82.3529	85.8586	81.0409	97.7309	97.2704
						c	+2	4	8	5	4	85	116	1.32013	2.47678	2.52525	1.48699	1.92875	2.31122
						t	+3	48	45	22	44	11	13	15.8416	13.9319	11.1111	16.3569	0.249603	0.259016
						t	+4	1	4	1	3	2	2	0.330033	1.23839	0.505051	1.11524	0.0453823	0.0398486
ctgattgacatcgttgattctttgacctaatttagtgagtAagg	tA	3056851 (+)	sibC (b4446)	2	97.4951	a	-3	0	0	0	0	0	0	0	0	0	0	0	0
						g	-2	1	1	0	0	0	1	1.25	0.653595	0	0	0	0.0256345
						t	-1	7	3	1	0	1	6	8.75	1.96078	1	0	0.0279252	0.153807
						A	+1	71	140	96	221	3509	3784	88.75	91.5033	96	95.671	97.9894	97.0008
						a	+2	1	0	2	5	59	94	1.25	0	2	2.1645	1.64758	2.40964
						g	+3	0	0	0	1	7	12	0	0	0	0.4329	0.195476	0.307613
						g	+4	0	9	1	4	5	4	0	5.88235	1	1.7316	0.139626	0.102538
ggctatcgacgaactggcgaggtaacgctatgttaacggtGtag	tG	742798 (+)	ybgI (b0710)	-29	97.4702	g	-3	0	0	0	0	0	0	0	0	0	0	0	0
						g	-2	0	0	0	1	0	0	0	0	0	0.243902	0	0
						t	-1	17	7	0	0	4	2	2.59146	1.91257	0	0	0.177936	0.0981354
						G	+1	613	341	403	391	2185	1992	93.4451	93.1694	98.0535	95.3659	97.1975	97.7429
						t	+2	22	15	6	16	45	38	3.35366	4.09836	1.45985	3.90244	2.00178	1.86457
						a	+3	2	2	2	1	9	3	0.304878	0.546448	0.486618	0.243902	0.400356	0.147203
						g	+4	2	1	0	1	5	3	0.304878	0.273224	0	0.243902	0.22242	0.147203
ggcgctgatattgcagaaatgagtgtggtatagtcaccttGcga	tG	214197 (-)	yaeP (b4406)	-72	97.4511	c	-3	0	0	0	0	0	0	0	0	0	0	0	0
						t	-2	0	0	0	0	0	0	0	0	0	0	0	0
						t	-1	5	1	0	0	1	0	2.77778	0.78125	0	0	0.0792393	0
						G	+1	171	124	140	199	1230	1179	95	96.875	96.5517	96.6019	97.4643	97.438
						c	+2	2	1	2	7	24	24	1.11111	0.78125	1.37931	3.39806	1.90174	1.98347
						g	+3	1	1	3	0	6	6	0.555556	0.78125	2.06897	0	0.475436	0.495868
						a	+4	1	1	0	0	1	1	0.555556	0.78125	0	0	0.0792393	0.0826446
gattacggtagaaatcctcaagcagcatatgatctcgggtAttc	tA	4368431 (-)	aspA (b4139)	-104	97.4459	g	-3	0	0	0	0	0	0	0	0	0	0	0	0
						g	-2	2	0	0	1	0	0	0.478469	0	0	0.265252	0	0
						t	-1	29	11	2	1	21	8	6.9378	4.74138	0.52356	0.265252	0.513322	0.221976
						A	+1	377	216	371	371	3991	3508	90.1914	93.1034	97.1204	98.4085	97.5556	97.3363
						t	+2	9	4	8	4	62	74	2.15311	1.72414	2.09424	1.06101	1.51552	2.05327
						t	+3	0	0	0	0	13	12	0	0	0	0	0.317771	0.332963
						c	+4	1	1	1	0	4	2	0.239234	0.431034	0.26178	0	0.0977756	0.0554939
tggattaccgtctgggtggaactgcgggtattatacatttGagg	tG	2449716 (-)	yfcO (b2332)	333	97.4323	t	-3	0	0	0	1	0	0	0	0	0	0.246305	0	0
						t	-2	0	0	1	0	0	0	0	0	0.346021	0	0	0
						t	-1	42	22	6	6	0	2	10.2439	10.2804	2.07612	1.47783	0	0.357143
						G	+1	363	185	268	385	665	546	88.5366	86.4486	92.7336	94.8276	97.3646	97.5
						a	+2	2	5	12	9	12	10	0.487805	2.33645	4.15225	2.21675	1.75695	1.78571
						g	+3	1	1	2	2	4	2	0.243902	0.46729	0.692042	0.492611	0.585652	0.357143
						g	+4	2	1	0	3	2	0	0.487805	0.46729	0	0.738916	0.292826	0
gcgaacaaaaaataatcacaagctgacttatacttgaactGtca	tG	2225664 (-)	yohC (b2135)	-33	97.3912	a	-3	0	0	0	0	0	0	0	0	0	0	0	0
						c	-2	0	0	0	0	0	0	0	0	0	0	0	0
						t	-1	3	2	0	0	0	1	1.45631	1.51515	0	0	0	0.081367
						G	+1	195	120	103	100	1105	1191	94.6602	90.9091	94.4954	97.0874	97.8742	96.9081
						t	+2	6	9	4	1	23	32	2.91262	6.81818	3.66972	0.970874	2.0372	2.60374
						c	+3	1	1	0	0	1	3	0.485437	0.757576	0	0	0.088574	0.244101
						a	+4	1	0	2	2	0	2	0.485437	0	1.83486	1.94175	0	0.162734
ctttctttacggtcaatcagcaaggtgttaaattgatcacGttt	cG	3990999 (+)	cyaA (b3806)	-154	97.3685	c	-3	0	0	0	0	1	1	0	0	0	0	0.0264831	0.0282885
						a	-2	0	0	0	1	1	1	0	0	0	0.240385	0.0264831	0.0282885
						c	-1	3	2	1	0	4	1	0.691244	0.921659	0.299401	0	0.105932	0.0282885
						G	+1	394	193	312	397	3667	3451	90.7834	88.9401	93.4132	95.4327	97.1133	97.6238
						t	+2	17	10	12	13	96	75	3.91705	4.60829	3.59281	3.125	2.54237	2.12164
						t	+3	18	11	8	5	6	4	4.14747	5.06912	2.39521	1.20192	0.158898	0.113154
						t	+4	2	1	1	0	1	2	0.460829	0.460829	0.299401	0	0.0264831	0.0565771
tacttgcaacattccagctggtccgacctatactctcgccActg	cA	2461205 (+)	fadL (b2344)	-101	97.364	g	-3	0	0	0	0	0	0	0	0	0	0	0	0
						c	-2	0	0	0	0	0	0	0	0	0	0	0	0
						c	-1	0	0	0	0	1	1	0	0	0	0	0.0410846	0.0199481
						A	+1	169	191	171	249	2362	4897	96.5714	96.9543	98.8439	96.8872	97.0419	97.686
						c	+2	6	6	1	6	58	105	3.42857	3.04569	0.578035	2.33463	2.38291	2.09455
						t	+3	0	0	0	2	6	8	0	0	0	0.77821	0.246508	0.159585
						g	+4	0	0	1	0	7	2	0	0	0.578035	0	0.287592	0.0398963
catccgttgccaatctggcaacggatgttatcatattgccAatt	cA	3234480 (-)	higB (b3083)	-25	97.3264	g	-3	0	0	0	0	0	0	0	0	0	0	0	0
						c	-2	0	0	0	0	0	0	0	0	0	0	0	0
						c	-1	3	1	0	0	0	0	1.19048	0.595238	0	0	0	0
						A	+1	242	163	192	194	737	757	96.0317	97.0238	97.4619	95.098	97.1014	97.5515
						a	+2	4	4	5	10	19	19	1.5873	2.38095	2.53807	4.90196	2.50329	2.44845
						t	+3	2	0	0	0	0	0	0.793651	0	0	0	0	0
						t	+4	1	0	0	0	3	0	0.396825	0	0	0	0.395257	0
tatattagacagaacaattcgattttcctaccctatgtatAagc	tA	1669662 (+)	ynfM (b1596)	-37	97.3187	t	-3	0	0	0	0	0	0	0	0	0	0	0	0
						a	-2	0	1	1	0	0	0	0	0.254453	0.342466	0	0	0
						t	-1	219	135	0	2	2	5	30.2905	34.3511	0	0.60423	0.0486145	0.152393
						A	+1	490	249	285	319	4010	3188	67.7732	63.3588	97.6027	96.3746	97.472	97.1655
						a	+2	13	8	5	7	92	65	1.79806	2.03562	1.71233	2.1148	2.23627	1.9811
						g	+3	1	0	1	2	8	15	0.138313	0	0.342466	0.60423	0.194458	0.457178
						c	+4	0	0	0	1	2	8	0	0	0	0.302115	0.0486145	0.243828
gggttgtattgcatgctgccactcctgctatactcgtcatActt	tA	438162 (+)	pgpA (b0418)	1573	97.2712	c	-3	0	0	0	0	0	0	0	0	0	0	0	0
						a	-2	0	1	0	0	0	0	0	0.155039	0	0	0	0
						t	-1	14	7	0	1	2	0	1.76545	1.08527	0	0.301205	0.0394633	0
						A	+1	762	617	336	327	4958	3354	96.0908	95.6589	98.5337	98.494	97.8295	96.7128
						c	+2	15	16	4	4	84	100	1.89155	2.48062	1.17302	1.20482	1.65746	2.88351
						t	+3	2	3	1	0	22	9	0.252207	0.465116	0.293255	0	0.434096	0.259516
						t	+4	0	1	0	0	2	5	0	0.155039	0	0	0.0394633	0.144175
gtggatggtaaaaatctcatttacacgctagtatcggcatAacc	tA	816914 (+)	moaA (b0781)	-130	97.2451	c	-3	0	0	0	0	0	0	0	0	0	0	0	0
						a	-2	0	0	0	0	0	0	0	0	0	0	0	0
						t	-1	14	20	0	0	0	0	4.14201	12.987	0	0	0	0
						A	+1	308	131	208	149	614	589	91.1243	85.0649	97.6526	95.5128	97.6153	96.875
						a	+2	12	3	4	6	12	19	3.5503	1.94805	1.87793	3.84615	1.90779	3.125
						c	+3	3	0	1	0	2	0	0.887574	0	0.469484	0	0.317965	0
						c	+4	1	0	0	1	1	0	0.295858	0	0	0.641026	0.158983	0
aatattctcaacataaaaaactttgtgtaatacttgtaacGcta	cG	1757383 (+)	lpp (b1677)	-38	97.2397	a	-3	0	0	0	0	1	2	0	0	0	0	0.00268406	0.00352119
						a	-2	1	0	0	1	1	0	0.0301841	0	0	0.0190114	0.00268406	0
						c	-1	5	1	4	3	18	29	0.150921	0.0324044	0.093611	0.0570342	0.0483131	0.0510572
						G	+1	3177	2933	4124	5059	36230	55229	95.895	95.0421	96.513	96.1787	97.2435	97.2359
						c	+2	88	108	108	158	878	1348	2.6562	3.49968	2.5275	3.0038	2.3566	2.37328
						t	+3	16	15	14	12	80	147	0.482946	0.486066	0.327639	0.228137	0.214725	0.258807
						a	+4	26	29	23	27	49	44	0.784787	0.939728	0.538264	0.513308	0.131519	0.0774662
cactgaatgctaaaacagcaaaaaatgctattatccaattAcct	tA	4635353 (-)	rob (b4396)	-43	97.2222	a	-3	0	0	0	0	0	0	0	0	0	0	0	0
						t	-2	0	0	0	0	0	0	0	0	0	0	0	0
						t	-1	99	58	1	1	3	2	22.2973	20.0692	0.261097	0.176367	0.0763942	0.039208
						A	+1	333	225	362	548	3822	4954	75	77.8547	94.517	96.649	97.3262	97.1182
						c	+2	9	4	16	12	86	130	2.02703	1.38408	4.17755	2.1164	2.18997	2.54852
						c	+3	1	1	2	1	13	11	0.225225	0.346021	0.522193	0.176367	0.331042	0.215644
						t	+4	2	1	2	5	3	4	0.45045	0.346021	0.522193	0.881834	0.0763942	0.078416
ctgatttgatactcccccctgactccttcatactgaaagtGaac	tG	1124081 (-)	grxB (b1064)	-27	97.2221	a	-3	0	0	0	0	0	0	0	0	0	0	0	0
						g	-2	0	0	0	0	0	0	0	0	0	0	0	0
						t	-1	2	0	0	0	0	0	0.180505	0	0	0	0	0
						G	+1	1058	810	482	474	616	752	95.4874	95.4064	76.0252	69.9115	97.1609	97.2833
						a	+2	44	39	133	187	12	14	3.97112	4.59364	20.9779	27.5811	1.89274	1.81113
						a	+3	2	0	16	16	5	6	0.180505	0	2.52366	2.35988	0.788644	0.776197
						c	+4	2	0	3	1	1	1	0.180505	0	0.473186	0.147493	0.157729	0.129366
aaccgcagaacttttccgcagggcatcagtcttaattagtGcca	tG	888057 (-)	rybB (b4417)	-3	97.1859	a	-3	0	1	1	0	3	1	0	0.10846	0.0705716	0	0.0379987	0.00876424
						g	-2	5	2	0	1	6	2	0.610501	0.21692	0	0.0486145	0.0759975	0.0175285
						t	-1	3	11	6	4	12	15	0.3663	1.19306	0.42343	0.194458	0.151995	0.131464
						G	+1	782	869	1352	1967	7670	11093	95.4823	94.2516	95.4128	95.6247	97.1501	97.2217
						c	+2	26	36	35	52	186	286	3.1746	3.90456	2.47001	2.52795	2.35592	2.50657
						c	+3	0	2	9	17	13	12	0	0.21692	0.635145	0.826446	0.164661	0.105171
						a	+4	3	1	14	16	5	1	0.3663	0.10846	0.988003	0.777832	0.0633312	0.00876424
cagaatagcggaacacatagccggtgctatacttaatctcGtta	cG	848950 (-)	dps (b0812)	-39	97.1517	c	-3	0	0	0	0	0	0	0	0	0	0	0	0
						t	-2	11	7	1	0	2	1	0.599455	0.774336	0.0888099	0	0.0368121	0.0232992
						c	-1	15	15	7	4	5	2	0.817439	1.65929	0.62167	0.620155	0.0920302	0.0465983
						G	+1	1735	827	1066	609	5283	4166	94.5504	91.4823	94.6714	94.4186	97.2391	97.0643
						t	+2	41	38	29	23	127	114	2.23433	4.20354	2.57549	3.56589	2.33757	2.6561
						t	+3	13	9	6	3	13	6	0.708447	0.995575	0.53286	0.465116	0.239278	0.139795
						a	+4	20	8	17	6	3	3	1.08992	0.884956	1.50977	0.930233	0.0552181	0.0698975
gtccgttgagcttctaccagcaaatacctatagtggcggcActt	cA	2942696 (+)	gcvB (b4443)	0	97.1427	g	-3	0	0	0	0	0	0	0	0	0	0	0	0
						g	-2	0	0	0	0	1	1	0	0	0	0	0.0159337	0.0161812
						c	-1	0	0	1	0	2	0	0	0	0.152439	0	0.0318674	0
						A	+1	592	387	643	489	6091	6009	97.6898	97.2362	98.0183	97.2167	97.0523	97.233
						c	+2	14	10	11	13	166	150	2.31023	2.51256	1.67683	2.58449	2.645	2.42718
						t	+3	0	0	0	1	14	18	0	0	0	0.198807	0.223072	0.291262
						t	+4	0	1	1	0	2	2	0	0.251256	0.152439	0	0.0318674	0.0323625
atacttgtatggtagtagctcagttgcgtagatttcatgcAtca	cA	1655170 (-)	rspA (b1581)	-29	97.0906	t	-3	0	0	0	0	0	0	0	0	0	0	0	0
						g	-2	0	0	0	0	0	0	0	0	0	0	0	0
						c	-1	3	2	4	5	1	1	0.869565	0.980392	0.672269	0.577367	0.296736	0.322581
						A	+1	325	191	552	803	325	303	94.2029	93.6275	92.7731	92.7252	96.4392	97.7419
						t	+2	16	6	17	21	9	6	4.63768	2.94118	2.85714	2.42494	2.67062	1.93548
						c	+3	1	3	14	18	2	0	0.289855	1.47059	2.35294	2.07852	0.593472	0
						a	+4	0	2	8	19	0	0	0	0.980392	1.34454	2.194	0	0
tcccccttgatgacgtggtttacgaccccatttagtagtcAacc	cA	12048 (+)	dnaK (b0014)	-115	97.0844	g	-3	0	0	0	0	0	0	0	0	0	0	0	0
						t	-2	0	0	0	0	0	0	0	0	0	0	0	0
						c	-1	102	50	3	1	4	1	3.74724	3.46741	0.063012	0.0158203	0.110223	0.0359583
						A	+1	2537	1351	4596	6126	3527	2697	93.2035	93.6893	96.5343	96.915	97.1893	96.9795
						a	+2	78	35	141	168	87	63	2.86554	2.42718	2.96156	2.65781	2.39735	2.26537
						c	+3	4	3	16	15	7	11	0.146951	0.208044	0.336064	0.237304	0.192891	0.395541
						c	+4	1	3	5	11	4	9	0.0367377	0.208044	0.10502	0.174023	0.110223	0.323625
atcactggctggcacgaaccctgcaatctacatttacagcGcaa	cG	1832039 (-)	astC (b1748)	-57	97.0807	a	-3	0	0	0	0	0	0	0	0	0	0	0	0
						g	-2	0	0	0	0	0	0	0	0	0	0	0	0
						c	-1	2	1	2	0	4	6	0.156986	0.141443	0.245098	0	0.0461574	0.0535954
						G	+1	1220	667	765	731	8424	10854	95.7614	94.3423	93.75	93.7179	97.2075	96.954
						c	+2	34	33	32	38	206	288	2.66876	4.66761	3.92157	4.87179	2.37711	2.57258
						a	+3	15	6	17	7	23	34	1.17739	0.848656	2.08333	0.897436	0.265405	0.303707
						a	+4	3	0	0	4	9	13	0.235479	0	0	0.512821	0.103854	0.116123
agggaagacaacattagcaaggttgtgtacatttgtacacAatt	cA	887401 (+)	rcdA (b0846)	-22	97.0726	c	-3	0	0	0	0	0	0	0	0	0	0	0	0
						a	-2	0	0	0	0	0	0	0	0	0	0	0	0
						c	-1	2	0	1	1	0	0	1.41844	0	0.675676	0.546448	0	0
						A	+1	135	79	145	173	168	198	95.7447	91.8605	97.973	94.5355	99.4083	94.7368
						a	+2	4	6	1	5	0	6	2.83688	6.97674	0.675676	2.73224	0	2.87081
						t	+3	0	1	0	2	1	0	0	1.16279	0	1.0929	0.591716	0
						t	+4	0	0	1	2	0	5	0	0	0.675676	1.0929	0	2.39234
atcacatacagctgcatttattaaggttatcatccgtttcGctg	cG	2167114 (+)	cyaR (b4438)	0	97.0659	t	-3	1	1	0	0	0	0	0.0388802	0.0466418	0	0	0	0
						t	-2	7	9	2	6	7	7	0.272162	0.419776	0.0311672	0.0514933	0.0581058	0.0188964
						c	-1	58	42	100	177	103	275	2.25505	1.95896	1.55836	1.51905	0.854985	0.74236
						G	+1	2401	1996	6115	11129	11676	36011	93.3515	93.097	95.2938	95.5115	96.9204	97.2114
						c	+2	96	82	174	303	242	696	3.7325	3.82463	2.71155	2.60041	2.0088	1.87885
						t	+3	5	7	17	25	14	42	0.194401	0.326493	0.264921	0.214555	0.116212	0.113379
						g	+4	4	7	9	12	5	13	0.155521	0.326493	0.140252	0.102987	0.0415041	0.0350934
gcaccaacatttgaccagaatttttatctacacttaagttAatt	tA	1290177 (+)	rssB (b1235)	-65	97.0455	g	-3	0	0	0	0	0	0	0	0	0	0	0	0
						t	-2	3	2	0	1	0	0	0.867052	0.877193	0	1.23457	0	0
						t	-1	112	59	0	3	1	2	32.3699	25.8772	0	3.7037	0.0417537	0.0851789
						A	+1	221	156	94	75	2331	2272	63.8728	68.4211	93.0693	92.5926	97.3278	96.7632
						a	+2	8	5	6	0	51	64	2.31214	2.19298	5.94059	0	2.12944	2.72572
						t	+3	1	6	0	0	8	5	0.289017	2.63158	0	0	0.334029	0.212947
						t	+4	1	0	1	2	4	5	0.289017	0	0.990099	2.46914	0.167015	0.212947
ttcgcttcccgaagctgtaactttccttatactcgaccttGcaa	tG	3239863 (+)	sstT (b3089)	-81	97.0344	c	-3	3	3	0	2	0	0	1.19522	1.71429	0	0.534759	0	0
						t	-2	0	0	2	0	0	0	0	0	0.606061	0	0	0
						t	-1	1	1	3	0	1	0	0.398406	0.571429	0.909091	0	0.0587199	0
						G	+1	234	158	314	354	1650	1379	93.2271	90.2857	95.1515	94.6524	96.8878	97.1811
						c	+2	13	12	8	14	49	33	5.17928	6.85714	2.42424	3.74332	2.87728	2.32558
						a	+3	0	1	3	2	2	7	0	0.571429	0.909091	0.534759	0.11744	0.493305
						a	+4	0	0	0	2	1	0	0	0	0	0.534759	0.0587199	0
gaatgatgacaaatcccagggaaaaagaaacaatagcaatAtcc	tA	4428819 (-)	ytfB (b4206)	-102	97.0053	a	-3	0	0	0	0	0	0	0	0	0	0	0	0
						a	-2	1	3	1	2	0	3	1.0989	5.17241	1.72414	3.22581	0	0.946372
						t	-1	15	7	0	0	1	0	16.4835	12.069	0	0	0.275482	0
						A	+1	72	46	55	57	355	305	79.1209	79.3103	94.8276	91.9355	97.7961	96.2145
						t	+2	3	1	2	2	5	7	3.2967	1.72414	3.44828	3.22581	1.37741	2.2082
						c	+3	0	1	0	1	1	1	0	1.72414	0	1.6129	0.275482	0.315457
						c	+4	0	0	0	0	1	1	0	0	0	0	0.275482	0.315457
aggttatgtaaaaacgtatcggcgtttatatactgaagatAagc	tA	980931 (+)	ycbB (b0925)	-116	96.9953	g	-3	0	0	0	0	0	0	0	0	0	0	0	0
						a	-2	0	1	0	0	1	0	0	0.193798	0	0	0.027894	0
						t	-1	111	99	2	0	1	2	19.6809	19.186	1.02564	0	0.027894	0.0775194
						A	+1	437	405	186	214	3471	2507	77.4823	78.4884	95.3846	98.6175	96.8201	97.1705
						a	+2	13	8	5	1	92	61	2.30496	1.55039	2.5641	0.460829	2.56625	2.36434
						g	+3	1	2	0	1	17	6	0.177305	0.387597	0	0.460829	0.474198	0.232558
						c	+4	2	1	2	1	3	4	0.35461	0.193798	1.02564	0.460829	0.083682	0.155039
aaacagtgacgatctaacccttcaagaatattctacgattGttc	tG	2043415 (+)	mtfA (b1976)	-236	96.9746	a	-3	0	0	0	0	0	0	0	0	0	0	0	0
						t	-2	1	1	0	0	0	0	1.35135	1.47059	0	0	0	0
						t	-1	3	5	0	2	1	0	4.05405	7.35294	0	1.06383	0.0798722	0
						G	+1	69	59	103	170	1223	928	93.2432	86.7647	97.1698	90.4255	97.6837	96.2656
						t	+2	1	3	3	10	21	31	1.35135	4.41176	2.83019	5.31915	1.67732	3.21577
						t	+3	0	0	0	6	6	5	0	0	0	3.19149	0.479233	0.518672
						c	+4	0	0	0	0	1	0	0	0	0	0	0.0798722	0
cctgacgcatgtttgcagcctgaatcgtaaactctctatcGttg	cG	4105785 (+)	cpxP (b4484)	-35	96.9378	a	-3	1	0	0	0	0	0	0.0224568	0	0	0	0	0
						t	-2	7	4	0	0	1	1	0.157197	0.167997	0	0	0.00374476	0.00366663
						c	-1	177	85	32	39	53	48	3.97485	3.56993	1.18212	1.11972	0.198472	0.175998
						G	+1	4137	2214	2584	3308	25894	26430	92.9037	92.9861	95.4562	94.9756	96.9667	96.909
						t	+2	100	55	71	104	643	654	2.24568	2.30995	2.62283	2.98593	2.40788	2.39798
						t	+3	15	12	13	16	67	87	0.336852	0.50399	0.480236	0.459374	0.250899	0.318997
						g	+4	16	11	7	16	46	53	0.359308	0.461991	0.258589	0.459374	0.172259	0.194331
gtcgatgcacagcctcatcattttgcagtatccttaagatAttc	tA	819858 (+)	ybhL (b0786)	-26	96.9287	g	-3	0	0	0	0	0	0	0	0	0	0	0	0
						a	-2	2	1	2	2	0	2	1.6	0.943396	2.0202	1.0582	0	1.85185
						t	-1	57	55	0	1	0	0	45.6	51.8868	0	0.529101	0	0
						A	+1	66	49	92	183	80	104	52.8	46.2264	92.9293	96.8254	97.561	96.2963
						t	+2	0	1	5	2	2	2	0	0.943396	5.05051	1.0582	2.43902	1.85185
						t	+3	0	0	0	0	0	0	0	0	0	0	0	0
						c	+4	0	0	0	1	0	0	0	0	0	0.529101	0	0
aagaattgaccattttgtcctgttgtgccttaatgtaagtAccg	tA	2629252 (+)	yfgG (b2504)	-38	96.9136	a	-3	0	0	0	0	1	0	0	0	0	0	0.0838223	0
						g	-2	0	0	0	0	0	0	0	0	0	0	0	0
						t	-1	60	41	1	1	0	1	21.0526	20.098	0.510204	0.363636	0	0.08285
						A	+1	218	159	189	264	1150	1176	76.4912	77.9412	96.4286	96	96.3956	97.4316
						c	+2	7	4	6	8	38	23	2.45614	1.96078	3.06122	2.90909	3.18525	1.90555
						c	+3	0	0	0	1	0	2	0	0	0	0.363636	0	0.1657
						g	+4	0	0	0	1	4	5	0	0	0	0.363636	0.335289	0.41425
caatgtggacttttctgccgtgattatagacacttttgttAcgc	tA	70221 (+)	araC (b0064)	-166	96.9085	g	-3	0	0	0	0	0	0	0	0	0	0	0	0
						t	-2	1	0	0	0	0	0	0.165017	0	0	0	0	0
						t	-1	258	100	3	0	2	1	42.5743	47.8469	0.733496	0	0.0849257	0.0576037
						A	+1	336	106	395	457	2284	1681	55.4455	50.7177	96.577	96.4135	96.9851	96.8318
						c	+2	8	1	10	12	56	50	1.32013	0.478469	2.44499	2.53165	2.37792	2.88018
						g	+3	1	1	0	2	7	4	0.165017	0.478469	0	0.421941	0.29724	0.230415
						c	+4	2	1	1	3	6	0	0.330033	0.478469	0.244499	0.632911	0.254777	0
tgtcaaaacaaaaccttcactcgcaactagaataactcccGcta	cG	2313084 (+)	micF (b4439)	0	96.8944	c	-3	0	0	0	0	0	0	0	0	0	0	0	0
						c	-2	1	0	0	0	0	0	0.485437	0	0	0	0	0
						c	-1	1	1	0	0	3	8	0.485437	0.414938	0	0	0.127768	0.28975
						G	+1	195	223	345	193	2277	2673	94.6602	92.5311	95.3039	94.6078	96.9761	96.8127
						c	+2	7	17	13	8	61	70	3.39806	7.05394	3.59116	3.92157	2.59796	2.53531
						t	+3	1	0	3	3	4	5	0.485437	0	0.828729	1.47059	0.170358	0.181094
						a	+4	1	0	1	0	3	5	0.485437	0	0.276243	0	0.127768	0.181094
cgctggttgattttccgaatttagcccttaaatcatcaacAatg	cA	1340135 (+)	yciS (b1279)	-108	96.8764	a	-3	0	0	0	0	0	0	0	0	0	0	0	0
						a	-2	2	1	0	0	0	0	1.24224	1.35135	0	0	0	0
						c	-1	2	0	0	0	0	0	1.24224	0	0	0	0	0
						A	+1	155	71	364	450	402	337	96.2733	95.9459	95.7895	96.7742	96.6346	97.1182
						a	+2	1	0	11	13	9	10	0.621118	0	2.89474	2.7957	2.16346	2.88184
						t	+3	1	2	3	2	0	0	0.621118	2.7027	0.789474	0.430108	0	0
						g	+4	0	0	2	0	5	0	0	0	0.526316	0	1.20192	0
atgctaataacagacgcgcttcactgatatacttctgcacGtga	cG	1743456 (-)	ribC (b1662)	-214	96.8702	c	-3	2	0	0	0	0	0	1.04167	0	0	0	0	0
						a	-2	0	0	0	0	0	0	0	0	0	0	0	0
						c	-1	0	1	0	1	0	0	0	0.892857	0	0.546448	0	0
						G	+1	184	104	161	170	613	684	95.8333	92.8571	94.7059	92.8962	96.9937	96.7468
						t	+2	2	2	2	5	13	14	1.04167	1.78571	1.17647	2.73224	2.05696	1.9802
						g	+3	3	2	4	6	6	9	1.5625	1.78571	2.35294	3.27869	0.949367	1.27298
						a	+4	1	3	3	1	0	0	0.520833	2.67857	1.76471	0.546448	0	0
atagttgaccaatttactcgggaatgtcagacttgaccctGcta	tG	2662199 (-)	iscR (b2531)	-68	96.8541	c	-3	0	0	0	0	0	0	0	0	0	0	0	0
						c	-2	8	0	1	8	3	3	1.18694	0	0.269542	1.5534	0.090307	0.103734
						t	-1	33	17	17	29	31	39	4.89614	5.78231	4.58221	5.63107	0.933173	1.34855
						G	+1	619	268	327	456	3229	2791	91.8398	91.1565	88.1402	88.5437	97.2005	96.5076
						c	+2	12	6	16	14	50	52	1.78042	2.04082	4.31267	2.71845	1.50512	1.79806
						t	+3	2	1	4	6	9	6	0.296736	0.340136	1.07817	1.16505	0.270921	0.207469
						a	+4	0	2	6	2	0	1	0	0.680272	1.61725	0.38835	0	0.0345781
atttagattgtcaatatcagaatcatggtaaattgatgttGgga	tG	399444 (+)	yaiZ (b0380)	-149	96.8457	g	-3	0	0	0	0	0	0	0	0	0	0	0	0
						t	-2	3	2	0	0	0	0	2.52101	2.94118	0	0	0	0
						t	-1	14	7	3	5	1	0	11.7647	10.2941	2.72727	2.97619	1.08696	0
						G	+1	99	59	104	156	88	50	83.1933	86.7647	94.5455	92.8571	95.6522	98.0392
						g	+2	3	0	3	7	3	1	2.52101	0	2.72727	4.16667	3.26087	1.96078
						g	+3	0	0	0	0	0	0	0	0	0	0	0	0
						a	+4	0	0	0	0	0	0	0	0	0	0	0	0
atagaccccgtcgcataaatgattatgataagatttatgcAttc	cA	970644 (+)	ycaR (b0917)	-29	96.8328	t	-3	0	0	0	0	0	0	0	0	0	0	0	0
						g	-2	1	0	0	0	0	1	1.42857	0	0	0	0	0.70922
						c	-1	2	0	1	3	0	1	2.85714	0	1.2987	2.0979	0	0.70922
						A	+1	54	48	65	122	72	134	77.1429	92.3077	84.4156	85.3147	98.6301	95.0355
						t	+2	5	1	4	9	0	5	7.14286	1.92308	5.19481	6.29371	0	3.5461
						t	+3	6	2	7	8	1	0	8.57143	3.84615	9.09091	5.59441	1.36986	0
						c	+4	2	1	0	1	0	0	2.85714	1.92308	0	0.699301	0	0
ttatcctgaactacgcaccattgaaggtgtcttaaaaagtAaga	tA	2766707 (+)	rnlB (b2631)	-277	96.8291	a	-3	4	2	1	0	1	0	0.186393	0.13541	0.0981354	0	0.0209732	0
						g	-2	36	16	5	5	15	13	1.67754	1.08328	0.490677	0.333778	0.314597	0.323222
						t	-1	348	237	4	3	6	4	16.2162	16.046	0.392542	0.200267	0.125839	0.099453
						A	+1	1699	1172	975	1436	4615	3896	79.1705	79.35	95.682	95.8611	96.7911	96.8672
						a	+2	35	24	24	32	111	89	1.63094	1.62492	2.35525	2.13618	2.32802	2.21283
						g	+3	10	1	4	3	16	14	0.465983	0.0677048	0.392542	0.200267	0.33557	0.348086
						a	+4	14	25	6	19	4	6	0.652377	1.69262	0.588813	1.26836	0.0838926	0.14918
tttactcccactttcatcccgtcccgtctatagtatttatGagg	tG	1671916 (+)	ydgD (b1598)	-44	96.8196	t	-3	0	0	0	0	0	0	0	0	0	0	0	0
						a	-2	0	0	0	0	0	0	0	0	0	0	0	0
						t	-1	3	0	4	1	0	0	3.61446	0	6.77966	1.63934	0	0
						G	+1	79	50	51	57	788	961	95.1807	89.2857	86.4407	93.4426	96.5686	97.0707
						a	+2	0	5	3	3	23	28	0	8.92857	5.08475	4.91803	2.81863	2.82828
						g	+3	0	0	1	0	4	0	0	0	1.69492	0	0.490196	0
						g	+4	1	1	0	0	1	1	1.20482	1.78571	0	0	0.122549	0.10101
ccagacttgaaaatagtcgcgtaacccatacgatgtgggtAtcg	tA	1912618 (-)	htpX (b1829)	-42	96.8131	g	-3	0	0	0	0	0	0	0	0	0	0	0	0
						g	-2	3	0	0	0	0	0	0.182815	0	0	0	0	0
						t	-1	473	221	4	2	2	8	28.8239	29.0026	0.382409	0.158353	0.0556483	0.237954
						A	+1	1127	511	1018	1218	3490	3245	68.6776	67.0604	97.3231	96.4371	97.1063	96.5199
						t	+2	28	28	19	41	77	89	1.70628	3.67454	1.81644	3.24624	2.14246	2.64723
						c	+3	7	2	2	2	20	15	0.426569	0.262467	0.191205	0.158353	0.556483	0.446163
						g	+4	3	0	3	0	5	5	0.182815	0	0.286807	0	0.139121	0.148721
atgcgatgaaaacctgcaaagagtggcttatagttaagctAaca	tA	480795 (-)	tomB (b0461)	-87	96.7482	g	-3	0	1	0	0	0	0	0	0.346021	0	0	0	0
						c	-2	0	0	0	0	0	0	0	0	0	0	0	0
						t	-1	292	169	4	3	0	3	66.2132	58.4775	1.8018	1.34529	0	1.06762
						A	+1	132	110	205	208	301	270	29.932	38.0623	92.3423	93.2735	97.411	96.0854
						a	+2	0	3	4	7	6	6	0	1.03806	1.8018	3.13901	1.94175	2.13523
						c	+3	2	1	0	1	2	0	0.453515	0.346021	0	0.44843	0.647249	0
						a	+4	15	5	9	4	0	2	3.40136	1.7301	4.05405	1.79372	0	0.711744
acccatcggaccagtagcaaatttgcgttatactcaactcActt	cA	475201 (-)	tesB (b0452)	-40	96.7344	c	-3	0	0	0	0	0	0	0	0	0	0	0	0
						t	-2	0	0	0	0	0	1	0	0	0	0	0	0.28169
						c	-1	4	2	0	1	1	0	3.66972	3.22581	0	1.33333	0.285714	0
						A	+1	97	56	75	67	337	345	88.9908	90.3226	98.6842	89.3333	96.2857	97.1831
						c	+2	8	4	1	7	9	5	7.33945	6.45161	1.31579	9.33333	2.57143	1.40845
						t	+3	0	0	0	0	3	3	0	0	0	0	0.857143	0.84507
						t	+4	0	0	0	0	0	1	0	0	0	0	0	0.28169
ctgtatggacataaggtgaatactttgttactttagcgtcAcag	cA	122034 (+)	pdhR (b0113)	-58	96.7309	g	-3	2	13	5	1	0	1	0.526316	5.43933	1.08696	0.17301	0	0.0922509
						t	-2	0	1	1	0	0	0	0	0.41841	0.217391	0	0	0
						c	-1	24	9	30	45	3	2	6.31579	3.76569	6.52174	7.78547	0.233281	0.184502
						A	+1	342	209	407	505	1247	1046	90	87.4477	88.4783	87.3702	96.9673	96.4945
						c	+2	7	5	10	13	28	29	1.84211	2.09205	2.17391	2.24913	2.17729	2.67528
						a	+3	2	2	5	11	6	3	0.526316	0.83682	1.08696	1.90311	0.466563	0.276753
						g	+4	3	0	2	3	2	3	0.789474	0	0.434783	0.519031	0.155521	0.276753
ttgttgcgtaggaaggaacaataatgatagtgttcccagtGaag	tG	1552712 (-)	yddM (b1477)	-30	96.71	a	-3	1	0	0	1	0	2	0.0724638	0	0	0.0493583	0	0.106326
						g	-2	2	0	0	0	0	1	0.144928	0	0	0	0	0.0531632
						t	-1	19	6	9	18	8	6	1.37681	0.813008	0.726392	0.88845	0.588235	0.318979
						G	+1	1291	677	1174	1921	1311	1825	93.5507	91.7344	94.7538	94.8174	96.3971	97.0229
						a	+2	59	50	45	70	30	35	4.27536	6.77507	3.63196	3.45508	2.20588	1.86071
						a	+3	5	3	9	12	6	8	0.362319	0.406504	0.726392	0.5923	0.441176	0.425306
						g	+4	3	2	2	4	5	4	0.217391	0.271003	0.161421	0.197433	0.367647	0.212653
catcccttccccctccgtcagatgaactaaacttgttaccGtta	cG	911076 (-)	poxB (b0871)	-27	96.633	a	-3	0	0	0	0	0	0	0	0	0	0	0	0
						c	-2	0	0	0	0	0	1	0	0	0	0	0	0.0422654
						c	-1	3	1	5	2	7	7	0.9375	0.440529	2.92398	1.18343	0.458115	0.295858
						G	+1	307	213	162	165	1480	2281	95.9375	93.8326	94.7368	97.6331	96.8586	96.4074
						t	+2	8	10	4	1	33	64	2.5	4.40529	2.33918	0.591716	2.15969	2.70499
						t	+3	2	3	0	1	8	10	0.625	1.32159	0	0.591716	0.52356	0.422654
						a	+4	0	0	0	0	0	3	0	0	0	0	0	0.126796
tatgcttgaaatatggtgatgccgtacccataacacagggActa	gA	456605 (+)	clpP (b0437)	-72	96.6283	g	-3	0	0	0	1	0	0	0	0	0	0.121803	0	0
						g	-2	0	0	0	1	0	0	0	0	0	0.121803	0	0
						g	-1	5	14	0	2	0	0	3.10559	13.4615	0	0.243605	0	0
						A	+1	147	84	427	793	356	378	91.3043	80.7692	96.6063	96.5895	97.8022	95.4545
						c	+2	9	5	10	17	8	16	5.59006	4.80769	2.26244	2.07065	2.1978	4.0404
						t	+3	0	1	2	3	0	1	0	0.961538	0.452489	0.365408	0	0.252525
						a	+4	0	0	3	4	0	1	0	0	0.678733	0.487211	0	0.252525
cggacttgttcggcgtacaagtgtacgctattgtgcattcGaaa	cG	2441641 (-)	fabB (b2323)	-36	96.6257	t	-3	0	0	0	0	0	0	0	0	0	0	0	0
						t	-2	0	0	0	0	0	0	0	0	0	0	0	0
						c	-1	2	1	0	0	0	0	0.930233	0.847458	0	0	0	0
						G	+1	205	104	203	287	336	485	95.3488	88.1356	91.0314	93.4853	96.83	96.4215
						a	+2	7	13	10	12	10	15	3.25581	11.0169	4.4843	3.90879	2.88184	2.98211
						a	+3	1	0	10	6	1	2	0.465116	0	4.4843	1.9544	0.288184	0.397614
						a	+4	0	0	0	2	0	1	0	0	0	0.651466	0	0.198807
attaatttgcatagtggcaattttttgccagactgaagagGtca	gG	464348 (+)	fadM (b0443)	-54	96.5962	g	-3	0	0	0	0	0	0	0	0	0	0	0	0
						a	-2	0	0	0	0	0	0	0	0	0	0	0	0
						g	-1	22	11	7	2	4	2	20.7547	13.9241	8.23529	2.22222	0.437158	0.350877
						G	+1	84	65	76	88	880	553	79.2453	82.2785	89.4118	97.7778	96.1749	97.0175
						t	+2	0	3	2	0	28	14	0	3.79747	2.35294	0	3.06011	2.45614
						c	+3	0	0	0	0	3	1	0	0	0	0	0.327869	0.175439
						a	+4	0	0	0	0	0	0	0	0	0	0	0	0
tgggccttgttttttctctctttatccccatctttattgcAatg	cA	693469 (-)	ybeZ (b0660)	-91	96.5824	t	-3	0	0	0	0	0	0	0	0	0	0	0	0
						g	-2	3	1	0	0	1	1	1.06762	0.699301	0	0	0.163934	0.204082
						c	-1	13	7	0	1	0	0	4.62633	4.8951	0	0.172117	0	0
						A	+1	255	130	364	568	582	479	90.7473	90.9091	97.8495	97.7625	95.4098	97.7551
						a	+2	9	5	8	7	22	9	3.20285	3.4965	2.15054	1.20482	3.60656	1.83673
						t	+3	0	0	0	3	3	0	0	0	0	0.516351	0.491803	0
						g	+4	1	0	0	2	2	1	0.355872	0	0	0.344234	0.327869	0.204082
atattttgagttaattcttaagctatgatacaaatcaggcGtgt	cG	1673778 (-)	mdtJ (b1600)	-277	96.578	g	-3	0	0	0	0	0	0	0	0	0	0	0	0
						g	-2	0	0	0	0	0	0	0	0	0	0	0	0
						c	-1	0	0	0	0	1	0	0	0	0	0	0.126422	0
						G	+1	178	94	129	220	763	556	96.7391	94	95.5556	96.4912	96.4602	96.6957
						t	+2	5	3	5	2	21	9	2.71739	3	3.7037	0.877193	2.65487	1.56522
						g	+3	1	2	1	4	6	10	0.543478	2	0.740741	1.75439	0.758534	1.73913
						t	+4	0	1	0	2	0	0	0	1	0	0.877193	0	0
atcttgtactatttacaaaacctatggtaactctttaggcAttc	cA	3950290 (+)	ilvL (b3766)	-32	96.5743	g	-3	0	1	0	0	0	0	0	0.934579	0	0	0	0
						g	-2	1	1	1	0	0	2	0.952381	0.934579	0.505051	0	0	0.0829531
						c	-1	0	0	0	0	2	1	0	0	0	0	0.183318	0.0414766
						A	+1	96	101	172	227	1052	2332	91.4286	94.3925	86.8687	93.0328	96.4253	96.7234
						t	+2	4	1	9	8	31	70	3.80952	0.934579	4.54545	3.27869	2.84143	2.90336
						t	+3	3	1	10	6	5	6	2.85714	0.934579	5.05051	2.45902	0.458295	0.248859
						c	+4	1	2	6	3	1	0	0.952381	1.86916	3.0303	1.22951	0.091659	0
gtgacttgccctaagcatgttgtagtgcgatacttgtaatGaca	tG	1645901 (-)	relB (b1564)	-29	96.5673	a	-3	0	0	0	0	0	0	0	0	0	0	0	0
						a	-2	0	0	0	0	0	0	0	0	0	0	0	0
						t	-1	3	4	0	0	0	3	0.454545	1.25392	0	0	0	0.75
						G	+1	616	290	417	612	402	386	93.3333	90.9091	88.3475	89.6047	96.6346	96.5
						a	+2	28	23	40	56	11	11	4.24242	7.21003	8.47458	8.19912	2.64423	2.75
						c	+3	1	0	4	9	2	0	0.151515	0	0.847458	1.31772	0.480769	0
						a	+4	12	2	11	6	1	0	1.81818	0.626959	2.33051	0.878477	0.240385	0
gttaattgtaatgattttgtgaacagcctatactgccgccAggt	cA	754955 (+)	sdhC (b0721)	-222	96.5563	g	-3	0	1	0	0	0	0	0	0.337838	0	0	0	0
						c	-2	0	0	0	0	0	0	0	0	0	0	0	0
						c	-1	2	2	0	0	1	2	0.484262	0.675676	0	0	0.0318167	0.0633112
						A	+1	397	281	283	426	3030	3055	96.1259	94.9324	97.2509	96.3801	96.4047	96.7078
						g	+2	8	4	8	11	97	81	1.93705	1.35135	2.74914	2.48869	3.08622	2.5641
						g	+3	6	4	0	3	4	12	1.45278	1.35135	0	0.678733	0.127267	0.379867
						t	+4	0	4	0	2	11	9	0	1.35135	0	0.452489	0.349984	0.2849
ttccgctgtttttctccggtaaggctgcgataattacatcAatg	cA	134339 (+)	yacL (b0119)	-49	96.5455	a	-3	0	0	0	0	0	0	0	0	0	0	0	0
						t	-2	0	0	0	0	0	0	0	0	0	0	0	0
						c	-1	17	13	0	3	1	0	4.58221	4.6595	0	1.15385	0.100503	0
						A	+1	344	256	222	251	958	1062	92.7224	91.7563	95.279	96.5385	96.2814	96.8095
						a	+2	9	10	9	5	31	30	2.42588	3.58423	3.86266	1.92308	3.11558	2.73473
						t	+3	1	0	2	1	3	2	0.269542	0	0.858369	0.384615	0.301508	0.182315
						g	+4	0	0	0	0	2	3	0	0	0	0	0.201005	0.273473
gttcccggaaaaaagtcatatttctgtcacactctttagtGatt	tG	1065559 (+)	agp (b1002)	-26	96.5323	a	-3	0	0	0	0	0	0	0	0	0	0	0	0
						g	-2	0	0	0	0	0	0	0	0	0	0	0	0
						t	-1	2	0	0	0	1	1	1.1236	0	0	0	0.645161	0.403226
						G	+1	163	77	126	117	148	242	91.573	92.7711	90	90.6977	95.4839	97.5806
						a	+2	13	6	11	12	3	5	7.30337	7.22892	7.85714	9.30233	1.93548	2.01613
						t	+3	0	0	3	0	2	0	0	0	2.14286	0	1.29032	0
						t	+4	0	0	0	0	1	0	0	0	0	0	0.645161	0
cagacacataagggtggcaacataggctatactcgacagcActa	cA	1289106 (+)	rssA (b1234)	-139	96.4972	a	-3	0	0	0	0	0	0	0	0	0	0	0	0
						g	-2	1	0	0	0	0	0	0.180832	0	0	0	0	0
						c	-1	4	4	5	5	9	6	0.723327	1.19048	1.55763	1.94553	0.546117	0.535236
						A	+1	534	325	307	247	1584	1086	96.5642	96.7262	95.6386	96.1089	96.1165	96.8778
						c	+2	14	5	8	3	52	25	2.53165	1.4881	2.49221	1.16732	3.15534	2.23015
						t	+3	0	1	0	1	1	2	0	0.297619	0	0.389105	0.0606796	0.178412
						a	+4	0	1	1	1	2	2	0	0.297619	0.311526	0.389105	0.121359	0.178412
gcatctttcatgacggcaaacaatagggtagtattgacaaGcca	aG	1195008 (+)	icd (b1136)	-115	96.4855	c	-3	0	0	0	0	0	2	0	0	0	0	0	0.0638162
						a	-2	3	1	2	3	0	1	0.564972	0.353357	0.409836	0.470958	0	0.0319081
						a	-1	5	0	3	3	5	6	0.94162	0	0.614754	0.470958	0.207383	0.191449
						G	+1	479	259	453	591	2330	3019	90.2072	91.5194	92.8279	92.7786	96.6404	96.3306
						c	+2	34	16	15	26	64	89	6.40301	5.65371	3.07377	4.08163	2.6545	2.83982
						c	+3	6	4	8	7	4	9	1.12994	1.41343	1.63934	1.0989	0.165906	0.287173
						a	+4	4	3	7	7	8	8	0.753296	1.06007	1.43443	1.0989	0.331813	0.255265
acacgtgacatagtttcagatttggactattccttggggtGctc	tG	3737274 (-)	bax (b3570)	-97	96.481	g	-3	1	1	0	1	0	0	0.265957	0.42735	0	0.212766	0	0
						g	-2	1	0	0	0	4	1	0.265957	0	0	0	0.114318	0.0350263
						t	-1	2	0	2	1	11	13	0.531915	0	0.501253	0.212766	0.314376	0.455342
						G	+1	364	225	393	460	3390	2743	96.8085	96.1538	98.4962	97.8723	96.8848	96.0771
						c	+2	7	8	4	8	80	89	1.8617	3.4188	1.00251	1.70213	2.28637	3.11734
						t	+3	1	0	0	0	11	9	0.265957	0	0	0	0.314376	0.315236
						c	+4	0	0	0	0	3	0	0	0	0	0	0.0857388	0
ggtgttgtcatccgtccaccctcgccactaaactggaagcAaga	cA	3605700 (+)	yhhN (b3468)	-51	96.4789	a	-3	0	0	0	0	0	0	0	0	0	0	0	0
						g	-2	0	0	0	0	0	0	0	0	0	0	0	0
						c	-1	1	1	0	0	0	0	0.826446	1.13636	0	0	0	0
						A	+1	117	83	82	119	385	380	96.6942	94.3182	97.619	96.748	95.7711	97.1867
						a	+2	2	1	2	2	14	10	1.65289	1.13636	2.38095	1.62602	3.48259	2.55754
						g	+3	0	0	0	0	3	0	0	0	0	0	0.746269	0
						a	+4	1	3	0	2	0	1	0.826446	3.40909	0	1.62602	0	0.255754
tactattgctttacgaaagcgtatccggtgaaataaagtcAacc	cA	3965691 (+)	trxA (b3781)	-70	96.4475	g	-3	1	1	2	1	0	0	0.621118	1.14943	1.26582	0.653595	0	0
						t	-2	2	4	3	0	0	0	1.24224	4.5977	1.89873	0	0	0
						c	-1	3	5	2	0	2	0	1.86335	5.74713	1.26582	0	0.896861	0
						A	+1	141	69	138	137	215	192	87.5776	79.3103	87.3418	89.5425	96.4126	96.4824
						a	+2	5	1	7	8	6	5	3.10559	1.14943	4.43038	5.22876	2.69058	2.51256
						c	+3	0	0	0	2	0	2	0	0	0	1.30719	0	1.00503
						c	+4	9	7	6	5	0	0	5.59006	8.04598	3.79747	3.26797	0	0
ccattttcccctactttcaatcctgtgataggatgtcactGatg	tG	3374518 (-)	nanR (b3226)	-29	96.4404	a	-3	0	0	0	0	0	0	0	0	0	0	0	0
						c	-2	1	0	0	1	0	0	0.714286	0	0	0.689655	0	0
						t	-1	6	1	0	1	0	5	4.28571	0.877193	0	0.689655	0	0.848896
						G	+1	125	105	93	136	542	566	89.2857	92.1053	96.875	93.7931	96.7857	96.0951
						a	+2	6	7	1	3	15	17	4.28571	6.14035	1.04167	2.06897	2.67857	2.88625
						t	+3	2	1	1	3	1	1	1.42857	0.877193	1.04167	2.06897	0.178571	0.169779
						g	+4	0	0	1	1	2	0	0	0	1.04167	0.689655	0.357143	0
ttttgtgcgcatttttcagaaatgtagatatttttagattAtgg	tA	2788927 (+)	csiD (b2659)	-58	96.4111	a	-3	3	3	1	5	8	12	0.0663277	0.100167	0.0366166	0.195542	0.0285653	0.0470884
						t	-2	4	7	0	2	1	5	0.0884369	0.233723	0	0.0782167	0.00357066	0.0196202
						t	-1	984	605	3	7	13	15	21.7555	20.2003	0.10985	0.273758	0.0464186	0.0588605
						A	+1	3409	2290	2633	2455	27031	24542	75.3703	76.4608	96.4116	96.011	96.5186	96.3036
						t	+2	94	65	72	59	688	629	2.07827	2.17028	2.6364	2.30739	2.45662	2.46822
						g	+3	23	10	14	20	234	250	0.508512	0.33389	0.512633	0.782167	0.835535	0.981008
						g	+4	6	15	8	9	31	31	0.132655	0.500835	0.292933	0.351975	0.110691	0.121645
atcaattggcttacccgcgataaaatgttaccattctgttGctt	tG	4160822 (-)	sthA (b3962)	-32	96.4097	g	-3	0	0	0	0	0	0	0	0	0	0	0	0
						t	-2	0	0	0	0	0	0	0	0	0	0	0	0
						t	-1	3	5	0	4	3	1	2.08333	4.7619	0	1.69492	0.291545	0.0943396
						G	+1	136	96	108	220	992	1022	94.4444	91.4286	94.7368	93.2203	96.4043	96.4151
						c	+2	4	2	5	7	33	26	2.77778	1.90476	4.38596	2.9661	3.207	2.45283
						t	+3	1	1	0	3	1	6	0.694444	0.952381	0	1.27119	0.0971817	0.566038
						t	+4	0	1	1	2	0	5	0	0.952381	0.877193	0.847458	0	0.471698
ttttcatgtaaaggtaattttgatgtctaagattaaaggtAacg	tA	657310 (+)	cspE (b0623)	18	96.4051	g	-3	2	3	0	2	7	5	0.234467	0.396301	0	0.632911	0.165955	0.154751
						g	-2	74	123	28	51	9	2	8.67526	16.2483	8.33333	16.1392	0.213371	0.0619003
						t	-1	193	203	48	72	30	25	22.626	26.8164	14.2857	22.7848	0.711238	0.773754
						A	+1	559	400	241	166	4074	3109	65.5334	52.8402	71.7262	52.5316	96.5861	96.2241
						a	+2	11	10	9	13	79	76	1.28957	1.321	2.67857	4.11392	1.87293	2.35221
						c	+3	1	2	2	1	14	10	0.117233	0.264201	0.595238	0.316456	0.331911	0.309502
						g	+4	13	16	8	11	5	4	1.52403	2.11361	2.38095	3.48101	0.11854	0.123801
gcgccttgtaagacttcgcgaaaaagacgattctatcttcGtcg	cG	2924524 (-)	csrB (b4408)	0	96.3903	t	-3	180	151	272	316	14	15	0.333531	0.320922	0.278341	0.241827	0.00246225	0.00380863
						t	-2	65	50	76	76	40	23	0.120442	0.106265	0.0777716	0.0581609	0.007035	0.00583991
						c	-1	282	273	259	285	419	283	0.522532	0.580209	0.265038	0.218103	0.0736916	0.0718562
						G	+1	51607	44907	93686	125352	548277	379476	95.6252	95.4412	95.8699	95.9287	96.4282	96.3523
						t	+2	1561	1416	2873	3892	16765	11909	2.89245	3.00944	2.93997	2.97845	2.94854	3.0238
						c	+3	195	158	371	497	2142	1483	0.361325	0.335799	0.379648	0.380342	0.376724	0.376547
						g	+4	78	97	185	254	929	653	0.14453	0.206155	0.189313	0.19438	0.163388	0.165803
cgccaaaagcgtcggttttttcatggctatacttagcgatGcac	tG	3386169 (-)	yhcO (b3239)	-40	96.3762	g	-3	0	0	0	0	0	0	0	0	0	0	0	0
						a	-2	1	0	0	0	0	2	0.520833	0	0	0	0	0.169924
						t	-1	1	1	1	0	2	6	0.520833	0.847458	0.8	0	0.120627	0.509771
						G	+1	186	113	121	101	1597	1135	96.875	95.7627	96.8	93.5185	96.3209	96.4316
						c	+2	3	4	3	6	48	32	1.5625	3.38983	2.4	5.55556	2.89505	2.71878
						a	+3	1	0	0	1	9	2	0.520833	0	0	0.925926	0.542823	0.169924
						c	+4	0	0	0	0	2	0	0	0	0	0	0.120627	0
ctattttctttattggcacagttactgcataatagtaaccAgtg	cA	2691340 (-)	glmY (b4441)	0	96.3692	a	-3	0	0	0	0	0	0	0	0	0	0	0	0
						c	-2	4	6	0	1	0	0	0.127024	0.164699	0	0.026617	0	0
						c	-1	43	45	26	31	74	89	1.36551	1.23525	0.794864	0.825126	0.266475	0.241238
						A	+1	2972	3435	3133	3553	26805	35496	94.3792	94.2904	95.7811	94.5701	96.525	96.2134
						g	+2	86	91	66	114	741	1103	2.73103	2.49794	2.01773	3.03434	2.66835	2.98973
						t	+3	20	55	28	41	71	119	0.635122	1.50974	0.856007	1.0913	0.255672	0.322554
						g	+4	24	11	18	17	79	86	0.762147	0.301949	0.55029	0.452489	0.28448	0.233107
aaccttacactgcgccactattttcgctatggttatgcgtAagc	tA	787670 (-)	gpmA (b0755)	-75	96.368	c	-3	0	0	0	0	0	0	0	0	0	0	0	0
						g	-2	2	0	2	0	0	0	0.833333	0	1.3245	0	0	0
						t	-1	18	9	0	0	2	2	7.5	6.87023	0	0	0.46729	0.501253
						A	+1	212	118	141	133	413	384	88.3333	90.0763	93.3775	95.6835	96.4953	96.2406
						a	+2	7	3	6	5	10	13	2.91667	2.29008	3.97351	3.59712	2.33645	3.25815
						g	+3	0	0	1	0	2	0	0	0	0.662252	0	0.46729	0
						c	+4	1	1	1	1	1	0	0.416667	0.763359	0.662252	0.719424	0.233645	0
gattcccatcatttttggcgatgttgtctattattaatttGcta	tG	4376510 (+)	ecnB (b4411)	-43	96.3632	t	-3	0	0	0	0	1	0	0	0	0	0	0.0249688	0
						t	-2	0	0	0	0	0	0	0	0	0	0	0	0
						t	-1	2	0	0	1	7	0	0.398406	0	0	0.444444	0.174782	0
						G	+1	438	298	264	207	3858	4120	87.251	90.0302	91.0345	92	96.3296	96.3968
						c	+2	23	8	10	8	108	110	4.58167	2.41692	3.44828	3.55556	2.69663	2.5737
						t	+3	24	16	9	7	22	26	4.78088	4.83384	3.10345	3.11111	0.549313	0.608329
						a	+4	15	9	7	2	9	18	2.98805	2.71903	2.41379	0.888889	0.224719	0.421151
ttccctctccctttttcagatctcatccatactgggtagtGgcg	tG	1553898 (-)	adhP (b1478)	-60	96.3607	a	-3	0	0	0	0	0	1	0	0	0	0	0	0.0482859
						g	-2	0	1	1	3	6	11	0	0.628931	0.775194	2.05479	0.340716	0.531144
						t	-1	4	2	5	0	29	44	1.68776	1.25786	3.87597	0	1.64679	2.12458
						G	+1	230	151	118	140	1700	1992	97.0464	94.9686	91.4729	95.8904	96.5361	96.1854
						g	+2	3	4	5	2	25	21	1.26582	2.51572	3.87597	1.36986	1.41965	1.014
						c	+3	0	1	0	1	1	1	0	0.628931	0	0.684932	0.0567859	0.0482859
						g	+4	0	0	0	0	0	1	0	0	0	0	0	0.0482859
tatttgccgccgctgtcagcgaacatgctatcttggttcgGtca	gG	1611884 (-)	yneF (b1522)	-30	96.353	t	-3	0	0	0	0	0	0	0	0	0	0	0	0
						c	-2	1	1	0	0	0	0	0.793651	1.2987	0	0	0	0
						g	-1	68	40	7	15	4	7	53.9683	51.9481	12.069	16.6667	0.511509	0.896287
						G	+1	56	35	50	73	755	751	44.4444	45.4545	86.2069	81.1111	96.5473	96.1588
						t	+2	1	1	1	2	22	22	0.793651	1.2987	1.72414	2.22222	2.8133	2.8169
						c	+3	0	0	0	0	0	1	0	0	0	0	0	0.128041
						a	+4	0	0	0	0	1	0	0	0	0	0	0.127877	0
gactggcgaagatttcgccagtcacgtctacccttgttatAcct	tA	3756535 (-)	aldB (b3588)	-24	96.3084	t	-3	0	0	0	0	0	0	0	0	0	0	0	0
						a	-2	0	0	0	0	0	0	0	0	0	0	0	0
						t	-1	2	3	1	0	0	0	1.05263	1.77515	0.581395	0	0	0
						A	+1	183	161	163	192	413	809	96.3158	95.2663	94.7674	97.9592	95.3811	97.2356
						c	+2	4	5	7	3	18	21	2.10526	2.95858	4.06977	1.53061	4.15704	2.52404
						c	+3	0	0	0	1	1	1	0	0	0	0.510204	0.230947	0.120192
						t	+4	1	0	1	0	1	1	0.526316	0	0.581395	0	0.230947	0.120192
tctgatcgacgcaaaaagtccgtatgcctactattagctcAcgg	cA	1770372 (+)	rprA (b4431)	0	96.2489	c	-3	0	0	0	0	0	0	0	0	0	0	0	0
						t	-2	0	0	0	0	2	0	0	0	0	0	0.0107521	0
						c	-1	3	1	1	1	16	23	0.327154	0.108696	0.117233	0.157233	0.0860169	0.0861262
						A	+1	878	885	823	616	17909	25695	95.747	96.1957	96.483	96.8553	96.2798	96.2179
						c	+2	24	23	14	12	487	707	2.61723	2.5	1.64127	1.88679	2.61814	2.64744
						g	+3	11	7	12	5	157	244	1.19956	0.76087	1.4068	0.786164	0.844041	0.913687
						g	+4	1	4	3	2	30	36	0.109051	0.434783	0.3517	0.314465	0.161282	0.134806
ggtaccagacctgaccgattatcagtggtataaggggtatGcgg	tG	1642572 (-)	quuQ (b1559)	669	96.2435	t	-3	0	3	1	1	0	0	0	4.41176	0.970874	0.540541	0	0
						a	-2	0	0	1	0	1	3	0	0	0.970874	0	0.120048	0.303337
						t	-1	1	3	0	6	9	6	0.877193	4.41176	0	3.24324	1.08043	0.606673
						G	+1	108	60	90	171	794	961	94.7368	88.2353	87.3786	92.4324	95.3181	97.1689
						c	+2	5	2	8	7	23	19	4.38596	2.94118	7.76699	3.78378	2.7611	1.92113
						g	+3	0	0	1	0	3	0	0	0	0.970874	0	0.360144	0
						g	+4	0	0	2	0	3	0	0	0	1.94175	0	0.360144	0
ctggtgtttaagacgagagtaaccgtctacactatcaaacAgga	cA	1791254 (-)	ydiU (b1706)	-10	96.2174	a	-3	0	0	0	0	0	0	0	0	0	0	0	0
						a	-2	2	0	0	0	2	0	0.925926	0	0	0	0.175747	0
						c	-1	1	0	2	1	6	11	0.462963	0	0.77821	0.371747	0.527241	0.734803
						A	+1	209	155	245	262	1096	1439	96.7593	95.679	95.3307	97.3978	96.3093	96.1256
						g	+2	2	2	7	4	28	37	0.925926	1.23457	2.72374	1.48699	2.46046	2.47161
						g	+3	1	3	1	2	6	8	0.462963	1.85185	0.389105	0.743494	0.527241	0.534402
						a	+4	1	2	2	0	0	2	0.462963	1.23457	0.77821	0	0	0.133601
aaaattggcaactaaaggttaaaaccgttataacacagtcAccg	cA	1405751 (-)	mcaS (b4426)	0	96.21	g	-3	0	0	1	0	1	0	0	0	0.022482	0	0.00142941	0
						t	-2	2	2	1	3	1	3	0.0679117	0.0628338	0.022482	0.0527797	0.00142941	0.00465188
						c	-1	4	1	3	7	25	35	0.135823	0.0314169	0.067446	0.123153	0.0357352	0.054272
						A	+1	2828	3069	4287	5467	67329	62026	96.0272	96.4185	96.3804	96.1823	96.2407	96.1793
						c	+2	91	99	142	180	2222	2096	3.08998	3.11027	3.19245	3.16678	3.17615	3.25012
						c	+3	13	11	9	19	289	251	0.441426	0.345586	0.202338	0.334272	0.413099	0.389208
						g	+4	7	1	5	8	92	79	0.237691	0.0314169	0.11241	0.140746	0.131506	0.1225
tcgattgacactaagggcggagtgacataatttcaggagtGagg	tG	2153311 (+)	sibA (b4436)	2	96.1988	a	-3	0	1	0	0	2	5	0	1.75439	0	0	0.164474	0.332005
						g	-2	0	0	0	0	0	1	0	0	0	0	0	0.0664011
						t	-1	1	1	0	2	2	5	1.16279	1.75439	0	2.43902	0.164474	0.332005
						G	+1	82	54	71	78	1172	1446	95.3488	94.7368	100	95.122	96.3816	96.0159
						a	+2	3	1	0	2	38	48	3.48837	1.75439	0	2.43902	3.125	3.18725
						g	+3	0	0	0	0	2	1	0	0	0	0	0.164474	0.0664011
						g	+4	0	0	0	0	0	0	0	0	0	0	0	0
actgtttgcataaaaattcatctgtatgcacaataatgttGtat	tG	3384677 (+)	argR (b3237)	-26	96.1869	g	-3	0	0	0	0	0	0	0	0	0	0	0	0
						t	-2	7	0	0	0	0	1	5.78512	0	0	0	0	0.561798
						t	-1	29	27	11	5	1	1	23.9669	36	11.828	4.09836	0.425532	0.561798
						G	+1	78	37	76	107	225	172	64.4628	49.3333	81.7204	87.7049	95.7447	96.6292
						t	+2	4	3	2	4	7	4	3.30579	4	2.15054	3.27869	2.97872	2.24719
						a	+3	0	4	0	2	2	0	0	5.33333	0	1.63934	0.851064	0
						t	+4	3	4	4	4	0	0	2.47934	5.33333	4.30108	3.27869	0	0
aaggttgtaaggtaaaacttatcgatttgataatggaaacGcat	cG	638881 (+)	ahpC (b0605)	-64	96.1821	a	-3	0	0	0	0	1	0	0	0	0	0	0.101523	0
						a	-2	0	1	0	0	1	0	0	0.990099	0	0	0.101523	0
						c	-1	2	0	0	0	0	0	1.42857	0	0	0	0	0
						G	+1	132	91	248	298	959	1236	94.2857	90.099	94.6565	94.6032	97.3604	95.0038
						c	+2	5	7	9	8	21	50	3.57143	6.93069	3.43511	2.53968	2.13198	3.8432
						a	+3	0	1	5	7	3	12	0	0.990099	1.9084	2.22222	0.304569	0.922367
						t	+4	1	1	0	2	0	3	0.714286	0.990099	0	0.634921	0	0.230592
cccattcgccttttggcggggtaagcattacagtagagttAccg	tA	2164246 (+)	baeR (b2079)	-30	96.1722	g	-3	2	0	0	0	0	0	0.896861	0	0	0	0	0
						t	-2	1	1	0	0	0	0	0.44843	0.826446	0	0	0	0
						t	-1	101	56	1	0	0	0	45.2915	46.281	1.40845	0	0	0
						A	+1	112	58	66	103	175	189	50.2242	47.9339	92.9577	93.6364	98.3146	94.0299
						c	+2	4	2	3	4	3	6	1.79372	1.65289	4.22535	3.63636	1.68539	2.98507
						c	+3	0	2	0	3	0	0	0	1.65289	0	2.72727	0	0
						g	+4	3	2	1	0	0	6	1.34529	1.65289	1.40845	0	0	2.98507
tttgcttgacaaaaagagagttactggtgagtattgttttGctg	tG	2653455 (-)	yfhM (b2520)	-1168	96.1694	t	-3	0	0	0	0	0	0	0	0	0	0	0	0
						t	-2	0	0	0	0	0	0	0	0	0	0	0	0
						t	-1	2	1	2	1	2	9	1.66667	0.917431	0.647249	0.18622	0.108342	0.281867
						G	+1	113	102	296	521	1778	3066	94.1667	93.578	95.7929	97.0205	96.3164	96.0225
						c	+2	5	4	10	11	48	82	4.16667	3.66972	3.23625	2.04842	2.60022	2.56812
						t	+3	0	1	1	3	10	9	0	0.917431	0.323625	0.558659	0.541712	0.281867
						g	+4	0	1	0	1	8	27	0	0.917431	0	0.18622	0.433369	0.8456
tacgcccagcatcgatcccgcccttgcctatacttagagcGttg	cG	1244678 (+)	ymgE (b1195)	-50	96.166	a	-3	0	0	0	0	0	0	0	0	0	0	0	0
						g	-2	0	0	0	0	0	0	0	0	0	0	0	0
						c	-1	0	0	0	0	1	3	0	0	0	0	0.0481232	0.143198
						G	+1	142	98	84	77	1999	2014	95.9459	94.2308	96.5517	98.7179	96.1983	96.1337
						t	+2	5	4	3	0	63	64	3.37838	3.84615	3.44828	0	3.03176	3.05489
						t	+3	1	0	0	0	10	9	0.675676	0	0	0	0.481232	0.429594
						g	+4	0	2	0	1	5	5	0	1.92308	0	1.28205	0.240616	0.238663
gagttacactttcttacataacgcctgctaaattatgagtAttt	tA	1925389 (+)	yobB (b1843)	-51	96.1525	a	-3	1	0	1	0	0	0	0.42735	0	0.591716	0	0	0
						g	-2	1	0	0	0	0	0	0.42735	0	0	0	0	0
						t	-1	19	17	1	0	0	0	8.11966	13.3858	0.591716	0	0	0
						A	+1	179	87	144	177	143	133	76.4957	68.5039	85.2071	93.6508	96.6216	95.6835
						t	+2	6	4	5	1	5	2	2.5641	3.14961	2.95858	0.529101	3.37838	1.43885
						t	+3	14	10	5	4	0	2	5.98291	7.87402	2.95858	2.1164	0	1.43885
						t	+4	14	9	13	7	0	2	5.98291	7.08661	7.69231	3.7037	0	1.43885
ccgctggacagcgatggcgcggcttcatacaatcggagctAact	tA	4118427 (+)	zapB (b3928)	-88	96.1508	g	-3	0	0	0	0	0	0	0	0	0	0	0	0
						c	-2	0	0	0	0	0	0	0	0	0	0	0	0
						t	-1	63	32	2	4	4	3	23.9544	18.4971	0.833333	1.63934	1.52672	1.5
						A	+1	190	135	219	224	251	193	72.2433	78.0347	91.25	91.8033	95.8015	96.5
						a	+2	6	4	16	15	7	4	2.28137	2.31214	6.66667	6.14754	2.67176	2
						c	+3	1	2	1	0	0	0	0.380228	1.15607	0.416667	0	0	0
						t	+4	3	0	2	1	0	0	1.14068	0	0.833333	0.409836	0	0
aacatttgacaaacatttagtttgcatacagattcgaatgGtgg	gG	1360967 (-)	puuA (b1297)	-59	96.1471	a	-3	1	1	3	3	0	0	0.143885	0.322581	0.877193	0.826446	0	0
						t	-2	34	19	4	6	0	0	4.89209	6.12903	1.16959	1.65289	0	0
						g	-1	355	121	95	115	5	8	51.0791	39.0323	27.7778	31.6804	0.411862	0.665557
						G	+1	268	148	227	220	1176	1147	38.5612	47.7419	66.3743	60.6061	96.8699	95.4243
						t	+2	23	12	6	8	18	28	3.30935	3.87097	1.75439	2.20386	1.4827	2.32945
						g	+3	4	3	5	4	13	17	0.57554	0.967742	1.46199	1.10193	1.07084	1.41431
						g	+4	10	6	2	7	2	2	1.43885	1.93548	0.584795	1.92837	0.164745	0.166389
aatactggattatgtgcgccgcctcacgcacaataatcagGctg	gG	2243722 (-)	folE (b2153)	-70	96.1174	c	-3	0	0	0	0	1	0	0	0	0	0	0.21322	0
						a	-2	0	0	0	1	0	0	0	0	0	0.833333	0	0
						g	-1	16	18	3	9	2	2	19.7531	22.7848	4.7619	7.5	0.426439	0.547945
						G	+1	63	58	58	107	448	353	77.7778	73.4177	92.0635	89.1667	95.5224	96.7123
						c	+2	2	2	1	3	12	10	2.46914	2.53165	1.5873	2.5	2.55864	2.73973
						t	+3	0	1	1	0	3	0	0	1.26582	1.5873	0	0.639659	0
						g	+4	0	0	0	0	3	0	0	0	0	0	0.639659	0
gggtaattatcaagctggtatgatgagttaatattatgttAacg	tA	1889807 (-)	fadD (b1805)	-61	96.1101	g	-3	0	2	2	2	0	0	0	0.47619	0.414079	0.383877	0	0
						t	-2	2	0	0	3	0	0	0.33557	0	0	0.575816	0	0
						t	-1	95	61	1	0	0	0	15.9396	14.5238	0.207039	0	0	0
						A	+1	482	341	463	490	1817	2761	80.8725	81.1905	95.8592	94.0499	95.7828	96.4373
						a	+2	11	7	11	20	66	81	1.84564	1.66667	2.27743	3.83877	3.47918	2.8292
						c	+3	2	6	5	2	5	15	0.33557	1.42857	1.0352	0.383877	0.263574	0.523926
						g	+4	4	3	1	4	9	6	0.671141	0.714286	0.207039	0.767754	0.474433	0.20957
atcggtttcttttttcacagaccaaagtatcatttgacctGtga	tG	1503657 (+)	insQ (b1432)	-60	96.0979	c	-3	0	0	0	0	0	0	0	0	0	0	0	0
						c	-2	0	0	0	0	0	0	0	0	0	0	0	0
						t	-1	6	4	0	2	1	4	3.59281	5.26316	0	1.62602	0.0944287	0.492611
						G	+1	156	69	74	118	1022	777	93.4132	90.7895	97.3684	95.935	96.5061	95.6897
						t	+2	5	2	2	1	28	19	2.99401	2.63158	2.63158	0.813008	2.644	2.3399
						g	+3	0	0	0	1	8	12	0	0	0	0.813008	0.75543	1.47783
						a	+4	0	1	0	1	0	0	0	1.31579	0	0.813008	0	0
ttttgccagttggtgttaatgttttgttagaatcagtcacGtaa	cG	1862464 (-)	msrB (b1778)	-35	96.076	c	-3	0	0	0	1	2	0	0	0	0	0.179856	0.0652955	0
						a	-2	12	14	10	9	6	7	1.80451	3.18182	2.38663	1.61871	0.195886	0.294737
						c	-1	2	0	0	1	5	2	0.300752	0	0	0.179856	0.163239	0.0842105
						G	+1	606	389	382	503	2949	2277	91.1278	88.4091	91.1695	90.4676	96.2782	95.8737
						t	+2	20	19	13	22	79	69	3.00752	4.31818	3.10263	3.95683	2.57917	2.90526
						a	+3	25	17	13	20	18	17	3.7594	3.86364	3.10263	3.59712	0.587659	0.715789
						a	+4	0	1	1	0	4	3	0	0.227273	0.238663	0	0.130591	0.126316
aggcatggtattgctggattaagcaggtaacatcagtgttAtag	tA	2578531 (-)	maeB (b2463)	-154	96.0396	g	-3	0	0	0	0	0	0	0	0	0	0	0	0
						t	-2	0	0	0	0	0	0	0	0	0	0	0	0
						t	-1	31	18	1	0	1	3	19.375	22.2222	0.684932	0	0.13245	0.468019
						A	+1	126	61	136	134	727	614	78.75	75.3086	93.1507	94.3662	96.2914	95.7878
						t	+2	3	1	5	5	19	17	1.875	1.23457	3.42466	3.52113	2.51656	2.65211
						a	+3	0	1	3	2	7	7	0	1.23457	2.05479	1.40845	0.927152	1.09204
						g	+4	0	0	1	1	1	0	0	0	0.684932	0.704225	0.13245	0
tggtcattatctgcacagtaaacggtggtatactgtgcagGtct	gG	1765146 (-)	ydiH (b1685)	-24	96.0361	c	-3	0	0	0	1	0	0	0	0	0	0.278552	0	0
						a	-2	0	2	0	0	0	0	0	0.966184	0	0	0	0
						g	-1	217	111	40	34	3	4	59.6154	53.6232	14.9254	9.47075	0.35545	0.503145
						G	+1	138	85	220	308	810	764	37.9121	41.0628	82.0896	85.7939	95.9716	96.1006
						t	+2	4	6	6	7	29	23	1.0989	2.89855	2.23881	1.94986	3.43602	2.89308
						c	+3	4	1	1	5	2	3	1.0989	0.483092	0.373134	1.39276	0.236967	0.377358
						t	+4	1	2	1	4	0	1	0.274725	0.966184	0.373134	1.11421	0	0.125786
aaaaatttgctaaattttgccaatttggtaaaacagttgcAtca	cA	257810 (+)	frsA (b0239)	1283	96.0312	t	-3	0	1	0	0	1	0	0	0.132626	0	0	0.0294118	0
						g	-2	0	0	0	0	0	0	0	0	0	0	0	0
						c	-1	1	3	1	4	2	5	0.071582	0.397878	0.0929368	0.229226	0.0588235	0.114916
						A	+1	1337	717	1024	1651	3270	4172	95.7051	95.0928	95.1673	94.6132	96.1765	95.886
						t	+2	33	22	33	48	85	133	2.3622	2.91777	3.06691	2.75072	2.5	3.05677
						c	+3	8	3	6	21	14	23	0.572656	0.397878	0.557621	1.20344	0.411765	0.528614
						a	+4	18	8	12	21	28	18	1.28848	1.06101	1.11524	1.20344	0.823529	0.413698
tagtctcagtttttgttaaaaaagtgtgtaggatattgttActc	tA	1688447 (-)	fumA (b1612)	-70	96.0235	g	-3	0	0	0	0	0	0	0	0	0	0	0	0
						t	-2	0	0	0	0	0	0	0	0	0	0	0	0
						t	-1	15	7	0	0	0	0	22.0588	10.9375	0	0	0	0
						A	+1	52	55	113	202	399	723	76.4706	85.9375	95.7627	98.0583	95	97.047
						c	+2	1	1	3	4	17	21	1.47059	1.5625	2.54237	1.94175	4.04762	2.81879
						t	+3	0	1	2	0	3	1	0	1.5625	1.69492	0	0.714286	0.134228
						c	+4	0	0	0	0	1	0	0	0	0	0	0.238095	0
ttctctgtatccaatacgttaaaagatttacactgtcttcGtat	cG	1746673 (+)	ydhR (b1667)	-27	96.0186	t	-3	0	0	0	0	0	0	0	0	0	0	0	0
						t	-2	0	0	0	0	0	0	0	0	0	0	0	0
						c	-1	6	5	0	0	0	0	5.60748	7.69231	0	0	0	0
						G	+1	96	56	64	59	295	213	89.7196	86.1538	91.4286	90.7692	96.0912	95.9459
						t	+2	2	4	4	4	10	2	1.86916	6.15385	5.71429	6.15385	3.25733	0.900901
						a	+3	3	0	2	2	1	7	2.80374	0	2.85714	3.07692	0.325733	3.15315
						t	+4	0	0	0	0	1	0	0	0	0	0	0.325733	0
gcaatagctatataatatagcctgtgctatatctgtatgtAatg	tA	853047 (-)	mntS (b4705)	-50	95.9881	t	-3	17	13	1	1	0	1	0.225854	0.274958	0.0194175	0.0192678	0	0.00368134
						g	-2	51	29	14	15	4	8	0.677561	0.613367	0.271845	0.289017	0.0167891	0.0294507
						t	-1	1079	580	17	10	36	50	14.3351	12.2673	0.330097	0.192678	0.151102	0.184067
						A	+1	6154	3946	4932	4979	22886	26055	81.759	83.4602	95.767	95.9345	96.0588	95.9174
						a	+2	181	122	150	142	690	794	2.40468	2.58037	2.91262	2.73603	2.89612	2.92299
						t	+3	25	19	25	22	131	175	0.332138	0.401861	0.485437	0.423892	0.549843	0.644235
						g	+4	20	19	11	21	78	81	0.26571	0.401861	0.213592	0.404624	0.327387	0.298189
atatacattttctgacatcctcatccgctatgctacaggcActa	cA	1929734 (-)	yebE (b1846)	-27	95.9801	g	-3	0	0	0	0	0	0	0	0	0	0	0	0
						g	-2	0	2	0	0	0	0	0	1.3245	0	0	0	0
						c	-1	0	0	0	0	0	0	0	0	0	0	0	0
						A	+1	155	143	182	266	158	76	97.4843	94.702	93.3333	97.0803	95.7576	96.2025
						c	+2	4	5	11	8	6	3	2.51572	3.31126	5.64103	2.91971	3.63636	3.79747
						t	+3	0	0	0	0	1	0	0	0	0	0	0.606061	0
						a	+4	0	1	2	0	0	0	0	0.662252	1.02564	0	0	0
gttcccttatcaacgcatcgagaacgtctacccttaaaggAcgt	gA	3149636 (+)	yghA (b3003)	-26	95.966	a	-3	0	1	0	0	0	0	0	0.793651	0	0	0	0
						g	-2	0	0	0	0	0	0	0	0	0	0	0	0
						g	-1	0	3	0	1	1	3	0	2.38095	0	1.5625	0.699301	1.06007
						A	+1	232	118	80	59	135	276	98.3051	93.6508	94.1176	92.1875	94.4056	97.5265
						c	+2	2	3	5	3	4	1	0.847458	2.38095	5.88235	4.6875	2.7972	0.353357
						g	+3	1	0	0	1	3	3	0.423729	0	0	1.5625	2.0979	1.06007
						t	+4	1	1	0	0	0	0	0.423729	0.793651	0	0	0	0
attgttgcatcacccgccaatgcgtggcttaatgcacatcAacg	cA	3719889 (+)	cspA (b3556)	-160	95.9476	a	-3	0	0	0	0	0	0	0	0	0	0	0	0
						t	-2	3	1	0	0	0	0	0.42796	0.186916	0	0	0	0
						c	-1	53	29	63	47	46	72	7.56063	5.42056	6.17647	4.34381	0.934959	1.54905
						A	+1	635	483	927	1002	4752	4430	90.5849	90.2804	90.8824	92.6063	96.5854	95.3098
						a	+2	9	19	27	29	114	128	1.28388	3.5514	2.64706	2.68022	2.31707	2.75387
						c	+3	0	1	2	3	5	14	0	0.186916	0.196078	0.277264	0.101626	0.301205
						g	+4	1	2	1	1	3	4	0.142653	0.373832	0.0980392	0.0924214	0.0609756	0.0860585
ttctccgacaaattcgcatttgtggaatataatctccatcAata	cA	486086 (-)	acrA (b0463)	-467	95.8944	a	-3	0	0	0	0	0	0	0	0	0	0	0	0
						t	-2	0	1	0	0	0	0	0	0.854701	0	0	0	0
						c	-1	21	20	6	6	0	0	16.9355	17.094	7.31707	7.5	0	0
						A	+1	98	91	73	71	203	156	79.0323	77.7778	89.0244	88.75	96.6667	95.122
						a	+2	3	3	0	2	5	6	2.41935	2.5641	0	2.5	2.38095	3.65854
						t	+3	0	1	0	1	0	2	0	0.854701	0	1.25	0	1.21951
						a	+4	2	1	3	0	2	0	1.6129	0.854701	3.65854	0	0.952381	0
tcagaatagacaaaaactctgagtgtaataatgtagcctcGtgt	cG	3888411 (+)	tnaC (b3707)	-24	95.8648	c	-3	0	0	0	0	0	0	0	0	0	0	0	0
						t	-2	0	0	1	0	1	0	0	0	0.139665	0	0.0541419	0
						c	-1	1	0	0	0	0	2	0.4	0	0	0	0	0.145985
						G	+1	245	157	682	830	1763	1319	98	91.8129	95.2514	94.1043	95.4521	96.2774
						t	+2	1	11	15	21	52	31	0.4	6.43275	2.09497	2.38095	2.81538	2.26277
						g	+3	3	3	13	20	30	17	1.2	1.75439	1.81564	2.26757	1.62426	1.24088
						t	+4	0	0	5	11	1	1	0	0	0.698324	1.24717	0.0541419	0.0729927
gccccttgcaatatcagaatcgcggcaccattaagtacgtAtgg	tA	63588 (-)	rapA (b0059)	-324	95.8517	c	-3	0	0	0	0	0	0	0	0	0	0	0	0
						g	-2	0	0	0	0	1	1	0	0	0	0	0.15456	0.178253
						t	-1	68	38	0	0	2	0	21.3836	16.1702	0	0	0.309119	0
						A	+1	240	191	355	646	621	537	75.4717	81.2766	96.4674	96.562	95.9815	95.7219
						t	+2	4	4	12	17	21	21	1.25786	1.70213	3.26087	2.54111	3.24575	3.74332
						g	+3	3	0	0	3	1	2	0.943396	0	0	0.44843	0.15456	0.356506
						g	+4	3	2	1	3	1	0	0.943396	0.851064	0.271739	0.44843	0.15456	0
tgttgattgcaattcccgcaaaaatgagtaaaattttcggGctt	gG	2746254 (-)	rpsP (b2609)	-69	95.8462	c	-3	0	0	0	0	0	0	0	0	0	0	0	0
						g	-2	0	0	0	0	0	0	0	0	0	0	0	0
						g	-1	1	1	0	3	3	0	1.08696	1.42857	0	1.75439	0.515464	0
						G	+1	68	59	124	135	556	626	73.913	84.2857	80	78.9474	95.5326	96.1598
						c	+2	10	5	13	11	21	22	10.8696	7.14286	8.3871	6.43275	3.60825	3.37942
						t	+3	10	3	14	14	1	1	10.8696	4.28571	9.03226	8.18713	0.171821	0.15361
						t	+4	3	2	4	8	1	2	3.26087	2.85714	2.58065	4.67836	0.171821	0.30722
ctactcgcccgtccgctgcgcttttccttatactgagactGagc	tG	3081847 (+)	loiP (b2936)	-66	95.8433	a	-3	0	0	1	0	0	0	0	0	1.0989	0	0	0
						c	-2	1	0	0	0	0	0	0.584795	0	0	0	0	0
						t	-1	1	1	0	0	0	0	0.584795	0.793651	0	0	0	0
						G	+1	162	114	86	106	1047	1108	94.7368	90.4762	94.5055	98.1481	96.4977	95.189
						a	+2	6	11	4	2	33	48	3.50877	8.73016	4.3956	1.85185	3.04147	4.12371
						g	+3	1	0	0	0	4	6	0.584795	0	0	0	0.368664	0.515464
						c	+4	0	0	0	0	1	2	0	0	0	0	0.0921659	0.171821
gttactggcgtttatgccctgactgaactaattattaatcAacc	cA	346432 (+)	yahO (b0329)	-52	95.8296	a	-3	0	0	0	0	0	0	0	0	0	0	0	0
						t	-2	0	0	0	0	0	0	0	0	0	0	0	0
						c	-1	3	2	1	0	5	1	0.561798	0.514139	0.442478	0	0.106952	0.0179437
						A	+1	507	374	206	198	4478	5343	94.9438	96.144	91.1504	89.5928	95.7861	95.873
						a	+2	19	13	18	22	178	205	3.55805	3.3419	7.9646	9.95475	3.80749	3.67845
						c	+3	4	0	1	1	12	15	0.749064	0	0.442478	0.452489	0.256684	0.269155
						c	+4	1	0	0	0	2	9	0.187266	0	0	0	0.0427807	0.161493
taaggcttgaaaagttcatttccagacccatttttacatcGtag	cG	3867518 (-)	ibpA (b3687)	-96	95.8243	a	-3	0	0	0	2	0	0	0	0	0	0.0359583	0	0
						t	-2	5	4	0	0	0	0	0.277162	0.445434	0	0	0	0
						c	-1	148	71	17	15	8	6	8.20399	7.90646	0.428427	0.269687	0.0629525	0.070406
						G	+1	1559	763	3498	4843	12188	8159	86.4191	84.9666	88.1552	87.073	95.9081	95.7404
						t	+2	51	32	97	174	257	177	2.82705	3.56347	2.44456	3.12837	2.02235	2.07698
						a	+3	35	25	335	493	224	161	1.94013	2.78396	8.44254	8.86372	1.76267	1.88923
						g	+4	6	3	21	35	31	19	0.332594	0.334076	0.529234	0.62927	0.243941	0.222952
tttttcccttaagaagttgttaaggactatcttgttaaatGctc	tG	3169709 (-)	ygiW (b3024)	-33	95.8034	a	-3	1	0	0	0	0	0	0.173913	0	0	0	0	0
						a	-2	2	0	0	1	1	2	0.347826	0	0	0.275482	0.0996016	0.104058
						t	-1	8	3	5	6	11	13	1.3913	0.542495	1.07759	1.65289	1.09562	0.676379
						G	+1	537	520	420	321	961	1843	93.3913	94.0325	90.5172	88.4298	95.7171	95.8897
						c	+2	21	27	35	28	20	53	3.65217	4.88246	7.5431	7.7135	1.99203	2.75754
						t	+3	5	1	2	6	4	9	0.869565	0.180832	0.431034	1.65289	0.398406	0.468262
						c	+4	1	2	2	1	7	2	0.173913	0.361664	0.431034	0.275482	0.697211	0.104058
attatagctaacagttaataaattgtagtatgatttggtgGcta	gG	1298439 (+)	ychE (b1242)	-159	95.801	g	-3	1	1	4	1	6	2	0.483092	0.724638	2.61438	0.763359	1.2685	0.505051
						t	-2	7	6	2	0	0	0	3.38164	4.34783	1.30719	0	0	0
						g	-1	147	102	66	58	9	5	71.0145	73.913	43.1373	44.2748	1.90275	1.26263
						G	+1	52	29	78	68	450	382	25.1208	21.0145	50.9804	51.9084	95.1374	96.4646
						c	+2	0	0	2	2	8	6	0	0	1.30719	1.52672	1.69133	1.51515
						t	+3	0	0	0	0	0	1	0	0	0	0	0	0.252525
						a	+4	0	0	1	2	0	0	0	0	0.653595	1.52672	0	0
tatcattgcgcaggtcgcgattaatccgtaatttacccacAact	cA	2419224 (-)	yfcD (b2299)	-48	95.7965	c	-3	0	0	0	0	0	0	0	0	0	0	0	0
						a	-2	3	0	1	4	0	0	1.88679	0	0.862069	3.1746	0	0
						c	-1	0	0	1	0	0	1	0	0	0.862069	0	0	0.3663
						A	+1	151	74	108	116	295	259	94.9686	93.6709	93.1034	92.0635	96.7213	94.8718
						a	+2	5	5	6	4	5	12	3.14465	6.32911	5.17241	3.1746	1.63934	4.3956
						c	+3	0	0	0	2	4	0	0	0	0	1.5873	1.31148	0
						t	+4	0	0	0	0	1	1	0	0	0	0	0.327869	0.3663
tgtttttgattttgcattttaaatgagtagtcttagttgtGctg	tG	4215404 (+)	aceB (b4014)	-74	95.7503	t	-3	4	11	0	0	13	14	0.0406545	0.159236	0	0	0.0175356	0.0196599
						g	-2	77	48	60	54	611	606	0.7826	0.694847	0.835422	0.563969	0.824172	0.850992
						t	-1	26	31	17	15	126	116	0.264254	0.448755	0.236703	0.156658	0.16996	0.162896
						G	+1	9429	6565	6897	9201	71079	68094	95.8329	95.0347	96.0317	96.094	95.8778	95.6229
						c	+2	270	226	189	260	2011	2089	2.74418	3.27157	2.63158	2.7154	2.71262	2.93354
						t	+3	24	25	18	37	212	226	0.243927	0.361899	0.250627	0.386423	0.285965	0.317367
						g	+4	9	2	1	8	83	66	0.0914727	0.0289519	0.0139237	0.0835509	0.111958	0.0926823
agtaaggcgctcttgccaccagcgtggtatatttgtctgcAagc	cA	1330714 (-)	yciN (b1273)	-46	95.6671	t	-3	0	1	0	0	0	0	0	0.318471	0	0	0	0
						g	-2	28	21	13	6	4	8	8.02292	6.6879	4.0625	1.94805	0.125826	0.252525
						c	-1	18	18	5	9	43	37	5.15759	5.73248	1.5625	2.92208	1.35263	1.16793
						A	+1	295	264	289	285	3044	3028	84.5272	84.0764	90.3125	92.5325	95.7534	95.5808
						a	+2	7	8	12	6	80	82	2.00573	2.54777	3.75	1.94805	2.51651	2.58838
						g	+3	1	1	0	1	7	11	0.286533	0.318471	0	0.324675	0.220195	0.347222
						c	+4	0	1	1	1	1	2	0	0.318471	0.3125	0.324675	0.0314564	0.0631313
tatggttccaaaatcgccttttgctgtatatactcacagcAtaa	cA	4257087 (+)	lexA (b4043)	-28	95.6187	a	-3	0	0	1	0	0	0	0	0	0.396825	0	0	0
						g	-2	1	1	0	0	0	0	0.263158	0.26738	0	0	0	0
						c	-1	2	2	0	1	1	0	0.526316	0.534759	0	0.271739	0.531915	0
						A	+1	353	346	238	330	179	314	92.8947	92.5134	94.4444	89.6739	95.2128	96.0245
						t	+2	13	12	4	13	3	8	3.42105	3.20856	1.5873	3.53261	1.59574	2.44648
						a	+3	10	13	8	22	4	4	2.63158	3.47594	3.1746	5.97826	2.12766	1.22324
						a	+4	1	0	1	2	1	1	0.263158	0	0.396825	0.543478	0.531915	0.30581
ggttaatcatttcactcttcaattatctataatgatgagtGatc	tG	3033041 (+)	idi (b2889)	-24	95.6019	a	-3	0	0	0	0	0	0	0	0	0	0	0	0
						g	-2	16	11	14	15	1	1	10.3896	13.0952	17.0732	18.9873	0.240385	0.248756
						t	-1	3	4	1	2	0	2	1.94805	4.7619	1.21951	2.53165	0	0.497512
						G	+1	129	58	65	58	397	385	83.7662	69.0476	79.2683	73.4177	95.4327	95.7711
						a	+2	5	9	2	4	16	13	3.24675	10.7143	2.43902	5.06329	3.84615	3.23383
						t	+3	0	1	0	0	2	0	0	1.19048	0	0	0.480769	0
						c	+4	1	1	0	0	0	1	0.649351	1.19048	0	0	0	0.248756
ttaacaccaactggcaaaattttgtcctaaacttgatctcGacg	cG	1862526 (+)	gapA (b1779)	-245	95.5999	c	-3	0	0	1	0	0	0	0	0	0.666667	0	0	0
						t	-2	0	0	0	0	0	0	0	0	0	0	0	0
						c	-1	1	0	0	0	0	1	0.714286	0	0	0	0	0.3003
						G	+1	131	97	137	60	231	324	93.5714	94.1748	91.3333	90.9091	93.9024	97.2973
						a	+2	7	6	10	6	12	7	5	5.82524	6.66667	9.09091	4.87805	2.1021
						c	+3	0	0	2	0	2	1	0	0	1.33333	0	0.813008	0.3003
						g	+4	1	0	0	0	1	0	0.714286	0	0	0	0.406504	0
tcatacttgcaaaagcggagaatcagctatccttttccctGaaa	tG	1114212 (-)	msyB (b1051)	-31	95.5787	c	-3	0	0	0	0	0	0	0	0	0	0	0	0
						c	-2	0	0	0	0	0	0	0	0	0	0	0	0
						t	-1	4	2	5	1	4	6	0.618238	0.611621	1.5528	0.571429	0.824742	1.36674
						G	+1	621	306	300	166	462	421	95.9815	93.578	93.1677	94.8571	95.2577	95.8998
						a	+2	19	19	10	4	16	8	2.93663	5.8104	3.10559	2.28571	3.29897	1.82232
						a	+3	1	0	3	2	0	2	0.15456	0	0.931677	1.14286	0	0.455581
						a	+4	2	0	4	2	3	2	0.309119	0	1.24224	1.14286	0.618557	0.455581
acggttgcaagatctgaaagaacgcactagagtcacaaatActg	tA	3055759 (+)	zapA (b2910)	147	95.5717	a	-3	0	0	0	0	0	0	0	0	0	0	0	0
						a	-2	2	1	2	1	3	1	0.115741	0.108814	0.17762	0.111607	0.0443721	0.0137476
						t	-1	154	71	10	9	97	126	8.91204	7.72579	0.888099	1.00446	1.4347	1.7322
						A	+1	1530	829	1088	860	6468	6945	88.5417	90.2067	96.6252	95.9821	95.6663	95.477
						c	+2	38	16	20	25	163	162	2.19907	1.74102	1.7762	2.79018	2.41089	2.22711
						t	+3	0	1	1	0	8	18	0	0.108814	0.0888099	0	0.118326	0.247457
						g	+4	4	1	5	1	22	22	0.231481	0.108814	0.44405	0.111607	0.325396	0.302447
agcggcggcaaaacttgcatcgctgtgccagactggttatAagg	tA	1228797 (+)	ycgN (b1181)	-18	95.5562	t	-3	0	0	0	0	0	0	0	0	0	0	0	0
						a	-2	5	3	1	1	0	0	0.703235	0.638298	0.487805	0.49505	0	0
						t	-1	230	155	3	0	1	0	32.3488	32.9787	1.46341	0	0.0657462	0
						A	+1	441	293	186	191	1443	1024	62.0253	62.3404	90.7317	94.5545	94.8718	96.2406
						a	+2	25	13	13	9	65	34	3.51617	2.76596	6.34146	4.45545	4.2735	3.19549
						g	+3	1	1	0	0	8	6	0.140647	0.212766	0	0	0.52597	0.56391
						g	+4	9	5	2	1	4	0	1.26582	1.06383	0.97561	0.49505	0.262985	0
aaaaattgccagaggttaaggattgtcttactattaaagtGact	tG	2495334 (-)	yfdY (b2377)	-42	95.5543	a	-3	0	0	0	0	0	0	0	0	0	0	0	0
						g	-2	0	0	0	1	0	0	0	0	0	0.454545	0	0
						t	-1	3	2	0	0	0	1	1.64835	1.68067	0	0	0	0.2
						G	+1	173	109	162	210	525	480	95.0549	91.5966	96.4286	95.4545	95.1087	96
						a	+2	5	7	6	7	25	16	2.74725	5.88235	3.57143	3.18182	4.52899	3.2
						c	+3	0	1	0	1	2	3	0	0.840336	0	0.454545	0.362319	0.6
						t	+4	1	0	0	1	0	0	0.549451	0	0	0.454545	0	0
gcaaattgacactctggtagaaatcgtcaaagctgtgattGgcg	tG	789010 (-)	galM (b0756)	-173	95.5422	a	-3	0	0	0	0	0	0	0	0	0	0	0	0
						t	-2	0	0	0	0	0	0	0	0	0	0	0	0
						t	-1	5	4	0	1	9	3	1.40056	1.85185	0	0.729927	0.433317	0.184162
						G	+1	344	209	143	135	1990	1552	96.3585	96.7593	98.6207	98.5401	95.8113	95.2732
						g	+2	7	2	1	0	63	62	1.96078	0.925926	0.689655	0	3.03322	3.80602
						c	+3	1	1	1	1	8	8	0.280112	0.462963	0.689655	0.729927	0.385171	0.491099
						g	+4	0	0	0	0	7	4	0	0	0	0	0.337025	0.245549
ttcccgtaaaagaaggcgaaaaacacgttacaatagccggGtac	gG	3041099 (-)	sdhE (b2897)	-29	95.5021	c	-3	0	0	0	0	0	0	0	0	0	0	0	0
						g	-2	6	1	0	3	0	1	4.87805	0.961538	0	1.54639	0	0.0831255
						g	-1	54	49	8	20	3	6	43.9024	47.1154	7.40741	10.3093	0.320171	0.498753
						G	+1	56	46	93	162	901	1141	45.5285	44.2308	86.1111	83.5052	96.158	94.8462
						t	+2	2	5	1	7	19	35	1.62602	4.80769	0.925926	3.60825	2.02775	2.90939
						a	+3	5	3	6	1	9	20	4.06504	2.88462	5.55556	0.515464	0.960512	1.66251
						c	+4	0	0	0	1	5	0	0	0	0	0.515464	0.533618	0
ccgccgttcaaaaatgtgtcactggtttacacttattcagGaat	gG	1724679 (-)	sodC (b1646)	-24	95.4719	c	-3	0	0	0	0	0	0	0	0	0	0	0	0
						a	-2	4	1	1	2	0	1	0.424628	0.15674	0.236967	0.925926	0	0.0552181
						g	-1	93	61	17	10	34	24	9.87261	9.56113	4.02844	4.62963	2.32082	1.32523
						G	+1	815	533	384	190	1393	1736	86.518	83.5423	90.9953	87.963	95.0853	95.8586
						a	+2	27	37	18	13	29	40	2.86624	5.79937	4.2654	6.01852	1.97952	2.20872
						a	+3	2	6	1	0	1	5	0.212314	0.940439	0.236967	0	0.0682594	0.276091
						t	+4	1	0	1	1	8	5	0.106157	0	0.236967	0.462963	0.546075	0.276091
tttctgtcttttgtactcgtgtactggtacagtgcaatgcAtaa	cA	3305860 (-)	mtr (b3161)	-43	95.4488	t	-3	0	0	0	0	0	0	0	0	0	0	0	0
						g	-2	3	1	1	2	1	4	3	1.06383	0.454545	0.546448	0.462963	1.27796
						c	-1	11	2	5	13	1	1	11	2.12766	2.27273	3.55191	0.462963	0.319489
						A	+1	83	86	207	337	206	299	83	91.4894	94.0909	92.0765	95.3704	95.5272
						t	+2	2	3	5	8	5	7	2	3.19149	2.27273	2.18579	2.31481	2.23642
						a	+3	1	1	2	3	1	1	1	1.06383	0.909091	0.819672	0.462963	0.319489
						a	+4	0	1	0	3	2	1	0	1.06383	0	0.819672	0.925926	0.319489
ttgttggtgctatcgcaggctgaatgtgtacaattgagacGtat	cG	4400220 (+)	hfq (b4172)	-68	95.4359	g	-3	1	2	2	3	0	1	1.23457	3.22581	2.35294	2.94118	0	0.0994036
						a	-2	1	4	1	3	0	0	1.23457	6.45161	1.17647	2.94118	0	0
						c	-1	0	0	3	0	2	1	0	0	3.52941	0	0.19802	0.0994036
						G	+1	73	51	72	91	967	957	90.1235	82.2581	84.7059	89.2157	95.7426	95.1292
						t	+2	5	4	5	1	31	38	6.17284	6.45161	5.88235	0.980392	3.06931	3.77734
						a	+3	1	1	2	4	9	8	1.23457	1.6129	2.35294	3.92157	0.891089	0.795229
						t	+4	0	0	0	0	1	1	0	0	0	0	0.0990099	0.0994036
tcgtcttgaattgcccgtgcaaggtcgccatatggtgattGtgg	tG	3545458 (+)	nfuA (b3414)	-166	95.3892	a	-3	0	0	0	0	0	0	0	0	0	0	0	0
						t	-2	0	0	0	0	0	1	0	0	0	0	0	0.0951475
						t	-1	14	5	6	12	5	1	4.28135	3.04878	1.04895	1.35287	0.294291	0.0951475
						G	+1	286	136	497	784	1628	998	87.4618	82.9268	86.8881	88.3878	95.8211	94.9572
						t	+2	11	10	13	33	34	23	3.36391	6.09756	2.27273	3.72041	2.00118	2.18839
						g	+3	13	10	47	51	32	28	3.97554	6.09756	8.21678	5.74972	1.88346	2.66413
						g	+4	3	3	9	7	0	0	0.917431	1.82927	1.57343	0.789177	0	0
agtcaggttgaagttgtgtatatcggctaaacttaggtttAaca	tA	2819273 (-)	csrA (b2696)	-127	95.3889	t	-3	0	0	0	0	0	0	0	0	0	0	0	0
						t	-2	15	8	0	0	0	1	1.71429	1.66667	0	0	0	0.0252972
						t	-1	182	101	8	2	81	57	20.8	21.0417	2	1.04167	1.49336	1.44194
						A	+1	659	361	379	187	5179	3767	75.3143	75.2083	94.75	97.3958	95.483	95.2947
						a	+2	15	9	12	3	141	111	1.71429	1.875	3	1.5625	2.59956	2.80799
						c	+3	2	1	1	0	14	13	0.228571	0.208333	0.25	0	0.258112	0.328864
						a	+4	2	0	0	0	9	4	0.228571	0	0	0	0.165929	0.101189
aaaactggacgcccggcgtgagtcatgctaacttagtgttGact	tG	3966162 (+)	rho (b3783)	-255	95.3421	g	-3	1	0	0	0	0	0	0.512821	0	0	0	0	0
						t	-2	0	0	0	0	0	0	0	0	0	0	0	0
						t	-1	2	1	0	0	0	1	1.02564	0.8	0	0	0	0.20202
						G	+1	188	110	188	198	490	472	96.4103	88	93.5323	94.2857	95.3307	95.3535
						a	+2	4	12	11	12	18	17	2.05128	9.6	5.47264	5.71429	3.50195	3.43434
						c	+3	0	1	0	0	5	4	0	0.8	0	0	0.972763	0.808081
						t	+4	0	1	2	0	1	1	0	0.8	0.995025	0	0.194553	0.20202
tatcgcacgtgaacatcactgggtgacgtatgctgaagtgGaga	gG	2421619 (+)	yfcH (b2304)	-89	95.3277	g	-3	2	1	0	0	0	1	0.829876	0.934579	0	0	0	0.361011
						t	-2	4	2	5	1	0	0	1.65975	1.86916	3.87597	0.746269	0	0
						g	-1	74	27	20	22	4	0	30.7054	25.2336	15.5039	16.4179	1.32013	0
						G	+1	148	58	98	101	290	263	61.4108	54.2056	75.969	75.3731	95.7096	94.9458
						a	+2	7	12	4	3	6	10	2.90456	11.215	3.10078	2.23881	1.9802	3.61011
						g	+3	0	0	0	2	3	2	0	0	0	1.49254	0.990099	0.722022
						a	+4	6	7	2	5	0	1	2.48963	6.54206	1.55039	3.73134	0	0.361011
cccttttcccttttctccggcgacggctaaattagaactcAtcc	cA	3231624 (+)	fadH (b3081)	-41	95.251	c	-3	0	0	0	0	0	0	0	0	0	0	0	0
						t	-2	2	5	1	0	5	7	1.05263	3.24675	0.45045	0	0.846024	0.704225
						c	-1	11	5	7	11	9	19	5.78947	3.24675	3.15315	2.83505	1.52284	1.91147
						A	+1	174	139	200	353	564	945	91.5789	90.2597	90.0901	90.9794	95.4315	95.0704
						t	+2	3	5	13	22	11	22	1.57895	3.24675	5.85586	5.6701	1.86125	2.21328
						c	+3	0	0	1	2	1	1	0	0	0.45045	0.515464	0.169205	0.100604
						c	+4	0	0	0	0	1	0	0	0	0	0	0.169205	0
cggtgttagcgtaacaacaaaagattgttatgcttgaaatAtgg	tA	456577 (+)	clpP (b0437)	-100	95.2326	a	-3	0	2	2	0	0	0	0	1.86916	1.68067	0	0	0
						a	-2	6	4	6	10	1	0	3.1746	3.73832	5.04202	11.9048	0.166389	0
						t	-1	21	14	0	2	1	0	11.1111	13.0841	0	2.38095	0.166389	0
						A	+1	147	73	105	71	568	522	77.7778	68.2243	88.2353	84.5238	94.5092	95.9559
						t	+2	8	3	4	0	11	11	4.2328	2.80374	3.36134	0	1.83028	2.02206
						g	+3	0	1	1	0	17	11	0	0.934579	0.840336	0	2.82862	2.02206
						g	+4	7	10	1	1	3	0	3.7037	9.34579	0.840336	1.19048	0.499168	0
tcatcacacattttgacatcaggaacggtatgctgaattcAcca	cA	2737124 (+)	raiA (b2597)	-30	95.225	t	-3	1	1	1	0	0	0	0.00819068	0.0127714	0.00816793	0	0	0
						t	-2	14	8	0	0	1	0	0.11467	0.102171	0	0	0.0106746	0
						c	-1	243	159	15	22	14	19	1.99033	2.03065	0.122519	0.114865	0.149445	0.140491
						A	+1	11545	7381	11619	18269	8943	12846	94.5614	94.2656	94.9032	95.3845	95.4633	94.9867
						c	+2	298	185	400	588	250	371	2.44082	2.36271	3.26717	3.07002	2.66866	2.74327
						c	+3	52	36	78	117	37	67	0.425915	0.45977	0.637099	0.61087	0.394962	0.495416
						a	+4	56	60	130	157	123	221	0.458678	0.766284	1.06183	0.819715	1.31298	1.63413
cacacttgtaagttttcaactacgttgtagactttacatcGcca	cG	1020186 (-)	ompA (b0957)	-133	95.1317	a	-3	0	0	1	0	13	6	0	0	0.0290444	0	0.0423605	0.0338524
						t	-2	1	1	1	0	3	0	0.0216263	0.0287604	0.0290444	0	0.00977549	0
						c	-1	41	27	20	25	69	55	0.886678	0.776531	0.580889	0.884017	0.224836	0.310314
						G	+1	4357	3276	3267	2683	29261	16823	94.2258	94.2192	94.8882	94.8727	95.3469	94.9165
						c	+2	178	136	118	93	1091	660	3.84948	3.91142	3.42724	3.28854	3.55502	3.72376
						c	+3	34	22	13	11	162	121	0.735294	0.632729	0.377578	0.388967	0.527876	0.68269
						a	+4	13	15	23	16	90	59	0.281142	0.431406	0.668022	0.565771	0.293265	0.332882
gcgtttgctgtgttattgacagttagcataaactaggtgtGacg	tG	1388844 (-)	tpx (b1324)	-33	95.1199	t	-3	0	0	0	0	0	0	0	0	0	0	0	0
						g	-2	0	0	0	0	0	0	0	0	0	0	0	0
						t	-1	2	1	0	0	0	0	0.990099	0.628931	0	0	0	0
						G	+1	184	146	173	212	429	565	91.0891	91.8239	92.5134	95.9276	95.122	95.1178
						a	+2	15	11	14	9	17	28	7.42574	6.91824	7.48663	4.0724	3.7694	4.7138
						c	+3	1	1	0	0	5	0	0.49505	0.628931	0	0	1.10865	0
						g	+4	0	0	0	0	0	1	0	0	0	0	0	0.16835
ttccttaatgtcatctttaccgggaacctaaactaaaattGgcg	tG	3776424 (-)	yibT (b4554)	-44	95.1081	a	-3	5	5	5	3	0	0	0.459559	0.626566	0.677507	0.309598	0	0
						t	-2	18	11	0	4	0	0	1.65441	1.37845	0	0.412797	0	0
						t	-1	91	57	6	7	6	11	8.36397	7.14286	0.813008	0.722394	0.132626	0.191205
						G	+1	926	661	683	917	4311	5461	85.1103	82.8321	92.5474	94.6336	95.2918	94.9244
						g	+2	37	29	33	26	185	246	3.40074	3.63409	4.47154	2.68318	4.0893	4.27603
						c	+3	7	33	4	10	16	27	0.643382	4.13534	0.542005	1.03199	0.353669	0.46932
						g	+4	4	2	7	2	6	8	0.367647	0.250627	0.948509	0.206398	0.132626	0.139058
ccaattgtaatgataaccattctcatattaatatgactacGtga	cG	4518263 (-)	fecI (b4293)	-28	95.1064	t	-3	0	0	0	0	0	0	0	0	0	0	0	0
						a	-2	0	0	0	0	0	0	0	0	0	0	0	0
						c	-1	0	4	0	0	0	0	0	2.09424	0	0	0	0
						G	+1	269	168	270	389	1083	1680	92.7586	87.9581	94.7368	94.878	95.6714	94.5414
						t	+2	11	1	4	6	26	38	3.7931	0.52356	1.40351	1.46341	2.29682	2.13844
						g	+3	4	4	9	11	18	54	1.37931	2.09424	3.15789	2.68293	1.59011	3.03883
						a	+4	6	14	2	4	5	5	2.06897	7.32984	0.701754	0.97561	0.441696	0.281373
ctattatgcaaaattcgccatcttcaactaaggtgaacaaGttt	aG	2028396 (-)	yodC (b1957)	-26	95.1002	c	-3	0	0	0	0	0	0	0	0	0	0	0	0
						a	-2	6	2	1	1	2	2	0.886263	0.39604	0.228311	0.25641	0.0548847	0.0624025
						a	-1	40	37	31	37	33	30	5.90842	7.32673	7.07763	9.48718	0.905598	0.936037
						G	+1	608	435	390	333	3462	3051	89.808	86.1386	89.0411	85.3846	95.0055	95.195
						t	+2	18	23	11	14	98	85	2.65879	4.55446	2.51142	3.58974	2.68935	2.65211
						t	+3	2	6	1	3	20	14	0.295421	1.18812	0.228311	0.769231	0.548847	0.436817
						t	+4	3	2	4	2	29	23	0.443131	0.39604	0.913242	0.512821	0.795829	0.717629
cagcgaaataatcctctctttatctgctatacctggtagtGtcc	tG	1698122 (-)	hdhA (b1619)	-82	95.0914	a	-3	0	0	0	0	0	0	0	0	0	0	0	0
						g	-2	6	6	2	0	24	16	3.72671	6.06061	2.8169	0	1.70697	1.51803
						t	-1	0	0	0	0	2	0	0	0	0	0	0.142248	0
						G	+1	151	91	65	53	1332	1006	93.7888	91.9192	91.5493	82.8125	94.7368	95.4459
						t	+2	3	2	4	6	40	27	1.86335	2.0202	5.6338	9.375	2.84495	2.56167
						c	+3	0	0	0	2	5	5	0	0	0	3.125	0.355619	0.474383
						c	+4	1	0	0	3	3	0	0.621118	0	0	4.6875	0.213371	0
ggaaactattttatctacgcgttagcgatagactgcttgcAtgg	cA	2153827 (-)	ibsB (b4668)	-90	95.0912	t	-3	1	1	0	0	0	1	1.85185	1.51515	0	0	0	0.160514
						g	-2	0	0	0	0	0	0	0	0	0	0	0	0
						c	-1	1	3	0	1	0	0	1.85185	4.54545	0	1.47059	0	0
						A	+1	46	57	63	64	511	592	85.1852	86.3636	90	94.1176	95.1583	95.0241
						t	+2	0	2	3	0	14	18	0	3.0303	4.28571	0	2.60708	2.88925
						g	+3	6	2	4	3	11	12	11.1111	3.0303	5.71429	4.41176	2.04842	1.92616
						g	+4	0	1	0	0	1	0	0	1.51515	0	0	0.18622	0
taaataatcctaagccaaattgctgactacacttaatctcAcgt	cA	4259179 (+)	yjbJ (b4045)	-58	95.0862	c	-3	4	3	1	0	1	0	0.071736	0.0626828	0.0222717	0	0.00215123	0
						t	-2	97	84	7	0	33	52	1.7396	1.75512	0.155902	0	0.0709906	0.114035
						c	-1	295	209	153	55	1197	1249	5.29053	4.3669	3.40757	2.85418	2.57502	2.73904
						A	+1	5035	4383	4227	1821	44248	43313	90.2977	91.5796	94.1425	94.4992	95.1877	94.9846
						c	+2	109	75	75	40	780	755	1.95481	1.56707	1.67038	2.07577	1.67796	1.6557
						g	+3	28	21	21	7	176	184	0.502152	0.43878	0.467706	0.363259	0.378617	0.403509
						t	+4	8	11	6	4	50	47	0.143472	0.229837	0.13363	0.207577	0.107562	0.10307
aaatttcgaaccctgagaacttaatgttgtcagaagaactGaga	tG	2709632 (-)	rseA (b2572)	-228	95.0703	a	-3	19	11	1	11	1	0	0.468557	0.507614	0.0387447	0.417774	0.0106998	0
						c	-2	60	55	7	2	2	3	1.47965	2.53807	0.271213	0.075959	0.0213995	0.0467946
						t	-1	324	179	116	127	180	123	7.99014	8.26027	4.49438	4.8234	1.92596	1.91858
						G	+1	3446	1778	2367	2385	8875	6102	84.9815	82.0489	91.7086	90.5811	94.9604	95.1802
						a	+2	133	97	69	86	229	150	3.2799	4.47623	2.67338	3.26624	2.45025	2.33973
						g	+3	22	6	7	8	33	20	0.54254	0.27688	0.271213	0.303836	0.353092	0.311964
						a	+4	51	41	14	14	26	13	1.25771	1.89202	0.542425	0.531713	0.278194	0.202776
cgttacggaactttacaaaaacgagacactctaaccctttGctt	tG	2710088 (-)	rpoE (b2573)	-76	95.0583	t	-3	3	1	3	3	2	2	2.5	0.833333	2.32558	1.6129	0.110988	0.0826788
						t	-2	7	11	0	3	9	16	5.83333	9.16667	0	1.6129	0.499445	0.66143
						t	-1	9	9	1	3	10	20	7.5	7.5	0.775194	1.6129	0.554939	0.826788
						G	+1	96	94	122	172	1720	2290	80	78.3333	94.5736	92.4731	95.4495	94.6672
						c	+2	5	5	3	4	56	77	4.16667	4.16667	2.32558	2.15054	3.10766	3.18313
						t	+3	0	0	0	1	4	13	0	0	0	0.537634	0.221976	0.537412
						t	+4	0	0	0	0	1	1	0	0	0	0	0.0554939	0.0413394
gtggtgagcttgctggcgatgaacgtgctacacttctgttGctg	tG	2535610 (+)	crr (b2417)	-224	95.0535	g	-3	0	0	0	0	0	1	0	0	0	0	0	0.0305717
						t	-2	0	0	0	0	0	0	0	0	0	0	0	0
						t	-1	5	3	1	2	27	10	1.21951	0.779221	0.328947	0.900901	0.582902	0.305717
						G	+1	387	364	294	210	4389	3119	94.3902	94.5455	96.7105	94.5946	94.7539	95.3531
						c	+2	15	12	7	8	128	95	3.65854	3.11688	2.30263	3.6036	2.76339	2.90431
						t	+3	2	3	2	2	37	23	0.487805	0.779221	0.657895	0.900901	0.798791	0.703149
						g	+4	1	3	0	0	51	23	0.243902	0.779221	0	0	1.10104	0.703149
cacccttgaaaaactgtcgatgtgggacgatatagcagatAaga	tA	3212688 (+)	rpoD (b3067)	-359	95.0412	g	-3	0	0	0	0	1	0	0	0	0	0	0.185185	0
						a	-2	1	0	0	1	0	1	0.224719	0	0	0.1221	0	0.161551
						t	-1	117	83	1	2	1	1	26.2921	28.5223	0.142857	0.2442	0.185185	0.161551
						A	+1	305	186	657	770	510	592	68.5393	63.9175	93.8571	94.0171	94.4444	95.6381
						a	+2	8	10	35	33	22	22	1.79775	3.43643	5	4.0293	4.07407	3.55412
						g	+3	3	1	1	4	4	3	0.674157	0.343643	0.142857	0.4884	0.740741	0.484653
						a	+4	11	11	6	9	2	0	2.47191	3.78007	0.857143	1.0989	0.37037	0
ctgggttacatgctcggcaaaacgccggtatttttaaagtAcga	tA	3248323 (+)	mzrA (b3096)	-116	95.0386	a	-3	59	38	54	62	0	1	14.899	12.1019	19.0813	19.3146	0	0.106157
						g	-2	30	24	26	31	4	6	7.57576	7.64331	9.18728	9.65732	0.269179	0.636943
						t	-1	64	56	32	38	4	1	16.1616	17.8344	11.3074	11.838	0.269179	0.106157
						A	+1	236	185	168	177	1419	891	59.596	58.9172	59.364	55.1402	95.4913	94.586
						c	+2	4	3	1	6	38	28	1.0101	0.955414	0.353357	1.86916	2.5572	2.9724
						g	+3	1	4	1	5	17	13	0.252525	1.27389	0.353357	1.55763	1.14401	1.38004
						a	+4	2	4	1	2	4	2	0.505051	1.27389	0.353357	0.623053	0.269179	0.212314
ccggcgacgcggtttttaacaggtgttctatgcttgaaatGagg	tG	1237285 (-)	ycgB (b1188)	-44	95.0247	a	-3	0	0	0	0	1	0	0	0	0	0	0.0113533	0
						a	-2	0	0	0	0	0	0	0	0	0	0	0	0
						t	-1	3	1	0	0	6	3	0.327154	0.165837	0	0	0.0681199	0.0405844
						G	+1	856	564	403	325	8376	7019	93.3479	93.5323	92.4312	93.9306	95.0954	94.954
						a	+2	56	37	31	20	391	339	6.10687	6.13599	7.11009	5.78035	4.43915	4.58604
						g	+3	0	1	2	1	29	24	0	0.165837	0.458716	0.289017	0.329246	0.324675
						g	+4	2	0	0	0	5	7	0.218103	0	0	0	0.0567666	0.094697
gcaatccgcaattatcatcccgcaaatctatactttttggGtca	gG	3877496 (-)	yidB (b3698)	-31	95.02	t	-3	0	0	0	1	1	0	0	0	0	1.49254	0.165017	0
						g	-2	0	0	0	0	0	0	0	0	0	0	0	0
						g	-1	16	7	1	1	6	2	10.1266	9.45946	1.38889	1.49254	0.990099	0.38835
						G	+1	129	62	64	57	568	496	81.6456	83.7838	88.8889	85.0746	93.7294	96.3107
						t	+2	9	3	5	6	27	10	5.6962	4.05405	6.94444	8.95522	4.45545	1.94175
						c	+3	3	2	1	1	3	3	1.89873	2.7027	1.38889	1.49254	0.49505	0.582524
						a	+4	1	0	1	1	1	4	0.632911	0	1.38889	1.49254	0.165017	0.776699
atttacaaatcttgattcctgaactgataggctacctggcGaag	cG	4399052 (+)	miaA (b4171)	-200	94.9736	g	-3	0	1	0	0	1	0	0	0.140845	0	0	0.0116414	0
						g	-2	1	2	2	0	4	3	0.103413	0.28169	0.250941	0	0.0465658	0.0418468
						c	-1	24	21	14	13	77	32	2.4819	2.95775	1.75659	1.57576	0.896391	0.446366
						G	+1	899	652	743	778	8165	6803	92.9679	91.831	93.2246	94.303	95.0524	94.8947
						a	+2	36	32	36	28	309	302	3.72285	4.50704	4.51694	3.39394	3.59721	4.21258
						a	+3	5	1	2	4	27	22	0.517063	0.140845	0.250941	0.484848	0.314319	0.306877
						g	+4	2	1	0	2	7	7	0.206825	0.140845	0	0.242424	0.0814901	0.0976426
tttccacacctaaaatgctatttctgcgataatagcaaccGttt	cG	3532680 (+)	pck (b3403)	-138	94.9583	a	-3	0	0	0	0	0	0	0	0	0	0	0	0
						c	-2	0	0	0	0	1	0	0	0	0	0	0.0758725	0
						c	-1	12	9	13	15	35	21	6.85714	12.8571	11.4035	10.7143	2.65554	2.34375
						G	+1	152	57	97	118	1241	858	86.8571	81.4286	85.0877	84.2857	94.1578	95.7589
						t	+2	8	3	2	3	35	14	4.57143	4.28571	1.75439	2.14286	2.65554	1.5625
						t	+3	3	1	1	3	3	3	1.71429	1.42857	0.877193	2.14286	0.227618	0.334821
						t	+4	0	0	1	1	3	0	0	0	0.877193	0.714286	0.227618	0
acgctaccgttaatgttatcgttgcggtaatgttgttactGtat	tG	939365 (+)	serS (b0893)	-63	94.9365	a	-3	1	0	0	0	0	0	0.689655	0	0	0	0	0
						c	-2	0	0	0	0	0	0	0	0	0	0	0	0
						t	-1	20	21	9	21	24	43	13.7931	17.2131	8.41121	11.6667	2.46154	2.55344
						G	+1	116	93	91	152	922	1605	80	76.2295	85.0467	84.4444	94.5641	95.3088
						t	+2	6	7	5	4	26	32	4.13793	5.7377	4.6729	2.22222	2.66667	1.90024
						a	+3	2	1	2	3	2	4	1.37931	0.819672	1.86916	1.66667	0.205128	0.23753
						t	+4	0	0	0	0	1	0	0	0	0	0	0.102564	0
agtaatgcgcatgattcgtatttccgtttaaaatgaagatAcgg	tA	2800694 (-)	ygaC (b2671)	-700	94.9269	g	-3	5	2	0	0	0	0	0.324254	0.214592	0	0	0	0
						a	-2	3	2	0	0	4	2	0.194553	0.214592	0	0	0.0354076	0.0306091
						t	-1	248	154	5	2	9	5	16.083	16.5236	0.628141	0.369686	0.0796672	0.0765228
						A	+1	1224	727	762	516	10749	6188	79.3774	78.0043	95.7286	95.3789	95.1492	94.7046
						c	+2	56	35	25	15	456	290	3.63165	3.75536	3.1407	2.77264	4.03647	4.43832
						g	+3	4	9	3	5	63	41	0.259403	0.965665	0.376884	0.924214	0.55767	0.627487
						g	+4	2	3	1	3	16	8	0.129702	0.321888	0.125628	0.554529	0.141631	0.122436
gaggctggtatatgttgcatttttagtttagagtttacttAatt	tA	2797187 (+)	ygaV (b2667)	-24	94.8971	c	-3	0	0	0	0	0	0	0	0	0	0	0	0
						t	-2	0	0	0	1	0	0	0	0	0	0.8	0	0
						t	-1	81	40	1	0	0	0	59.1241	43.0108	1.26582	0	0	0
						A	+1	48	43	75	118	150	147	35.0365	46.2366	94.9367	94.4	94.3396	95.4545
						a	+2	2	2	2	5	7	4	1.45985	2.15054	2.53165	4	4.40252	2.5974
						t	+3	0	1	0	0	0	0	0	1.07527	0	0	0	0
						t	+4	6	7	1	1	2	3	4.37956	7.52688	1.26582	0.8	1.25786	1.94805
gagacttgtttaatgtgtttgtatgattcagtatgttcttGcat	tG	508182 (+)	ybaQ (b0483)	-36	94.8907	c	-3	1	0	0	1	0	1	0.847458	0	0	0.485437	0	0.0763359
						t	-2	0	0	0	0	0	0	0	0	0	0	0	0
						t	-1	0	3	1	1	0	0	0	4.83871	1.06383	0.485437	0	0
						G	+1	106	55	87	187	761	1240	89.8305	88.7097	92.5532	90.7767	95.125	94.6565
						c	+2	2	1	4	9	22	43	1.69492	1.6129	4.25532	4.36893	2.75	3.28244
						a	+3	8	2	2	5	14	25	6.77966	3.22581	2.12766	2.42718	1.75	1.9084
						t	+4	1	1	0	3	3	1	0.847458	1.6129	0	1.45631	0.375	0.0763359
atttcttcaatctgtttttgatccatgatatgttatctccGcgt	cG	2557312 (+)	intZ (b2442)	-1546	94.8708	t	-3	0	0	0	0	1	0	0	0	0	0	0.0455373	0
						c	-2	0	0	0	0	0	0	0	0	0	0	0	0
						c	-1	5	2	0	0	6	5	2.6738	1.63934	0	0	0.273224	0.31348
						G	+1	171	112	123	150	2085	1512	91.4439	91.8033	96.8504	91.4634	94.9454	94.7962
						c	+2	7	6	4	10	84	60	3.74332	4.91803	3.14961	6.09756	3.82514	3.76176
						g	+3	0	1	0	4	16	18	0	0.819672	0	2.43902	0.728597	1.12853
						t	+4	4	1	0	0	4	0	2.13904	0.819672	0	0	0.182149	0
catggaagaaacttccgggcaaagaatgaatcttaagagtAtgc	tA	1890560 (-)	yeaY (b1806)	-28	94.8683	a	-3	0	0	0	0	0	0	0	0	0	0	0	0
						g	-2	7	5	0	0	6	5	3.68421	2.90698	0	0	1.30435	1.14679
						t	-1	17	13	0	0	0	0	8.94737	7.55814	0	0	0	0
						A	+1	160	146	140	138	436	414	84.2105	84.8837	96.5517	95.8333	94.7826	94.9541
						t	+2	2	4	5	3	15	11	1.05263	2.32558	3.44828	2.08333	3.26087	2.52294
						g	+3	0	0	0	1	3	6	0	0	0	0.694444	0.652174	1.37615
						c	+4	4	4	0	2	0	0	2.10526	2.32558	0	1.38889	0	0
agcgttttttttacagcaggataaatgatattatttgttgGatt	gG	2754748 (-)	ratA (b2619)	16	94.842	t	-3	0	0	0	0	0	0	0	0	0	0	0	0
						t	-2	1	2	1	1	0	1	0.925926	2.94118	1.11111	0.787402	0	0.735294
						g	-1	82	47	51	55	1	7	75.9259	69.1176	56.6667	43.3071	0.746269	5.14706
						G	+1	20	13	29	60	132	124	18.5185	19.1176	32.2222	47.2441	98.5075	91.1765
						a	+2	0	4	0	2	1	2	0	5.88235	0	1.5748	0.746269	1.47059
						t	+3	0	1	5	5	0	1	0	1.47059	5.55556	3.93701	0	0.735294
						t	+4	5	1	4	4	0	1	4.62963	1.47059	4.44444	3.14961	0	0.735294
tgcggttggtaataaaagtctggctccctataatgagccaGact	aG	4470944 (-)	ridA (b4243)	-31	94.8103	c	-3	0	0	0	0	0	0	0	0	0	0	0	0
						c	-2	0	0	0	0	0	0	0	0	0	0	0	0
						a	-1	4	0	7	10	4	2	2.27273	0	1.92837	1.42857	2.53165	0.550964
						G	+1	114	69	228	437	149	346	64.7727	65.0943	62.8099	62.4286	94.3038	95.3168
						a	+2	31	20	81	160	5	13	17.6136	18.8679	22.314	22.8571	3.16456	3.58127
						c	+3	17	7	22	52	0	0	9.65909	6.60377	6.06061	7.42857	0	0
						t	+4	10	10	25	41	0	2	5.68182	9.43396	6.88705	5.85714	0	0.550964
aaaagcagcacaaggtgcatttcatggtatagttgactatAcgg	tA	3072857 (-)	pgk (b2926)	-235	94.8074	t	-3	17	22	6	12	1	3	3.0853	5.37897	1.92308	3.38983	0.0555247	0.136488
						a	-2	25	20	9	18	16	29	4.53721	4.88998	2.88462	5.08475	0.888395	1.31938
						t	-1	97	77	7	18	7	13	17.6044	18.8264	2.24359	5.08475	0.388673	0.591447
						A	+1	370	268	268	291	1700	2093	67.1506	65.5257	85.8974	82.2034	94.392	95.2229
						c	+2	20	11	12	11	63	50	3.62976	2.68949	3.84615	3.10734	3.49806	2.2748
						g	+3	12	8	7	1	9	8	2.17786	1.95599	2.24359	0.282486	0.499722	0.363967
						g	+4	10	3	3	3	5	2	1.81488	0.733496	0.961538	0.847458	0.277624	0.0909918
aacgcgggtctgcccgcgtcagttcactaagcttagtcccAcgt	cA	1068001 (+)	ymdF (b4518)	-80	94.7201	c	-3	0	0	1	0	0	0	0	0	0.232019	0	0	0
						c	-2	0	0	0	0	1	0	0	0	0	0	0.0509684	0
						c	-1	6	5	8	2	54	35	1.66667	2.29358	1.85615	1.1236	2.75229	2.45442
						A	+1	344	207	414	171	1847	1359	95.5556	94.9541	96.0557	96.0674	94.1386	95.3015
						c	+2	9	4	7	5	57	28	2.5	1.83486	1.62413	2.80899	2.9052	1.96353
						g	+3	1	2	1	0	3	3	0.277778	0.917431	0.232019	0	0.152905	0.210379
						t	+4	0	0	0	0	0	1	0	0	0	0	0	0.0701262
tttttgcccagcacactgagaacgtgagatactcacaactGtat	tG	3817701 (+)	dinD (b3645)	-59	94.687	a	-3	0	0	0	0	0	0	0	0	0	0	0	0
						c	-2	1	0	0	0	0	0	0.900901	0	0	0	0	0
						t	-1	19	8	7	3	20	6	17.1171	11.1111	9.21053	4.6875	3.14465	1.16279
						G	+1	87	63	67	59	598	492	78.3784	87.5	88.1579	92.1875	94.0252	95.3488
						t	+2	3	1	0	2	16	16	2.7027	1.38889	0	3.125	2.51572	3.10078
						a	+3	1	0	2	0	2	2	0.900901	0	2.63158	0	0.314465	0.387597
						t	+4	0	0	0	0	0	0	0	0	0	0	0	0
tgatcttgagcattaacgcatttaatgcttattttaatagGctg	gG	1916166 (-)	msrC (b1832)	-38	94.6739	t	-3	0	0	0	0	0	0	0	0	0	0	0	0
						a	-2	1	0	0	0	0	0	0.719424	0	0	0	0	0
						g	-1	38	19	10	6	6	6	27.3381	23.1707	11.1111	5.60748	0.719424	0.769231
						G	+1	89	56	66	83	789	739	64.0288	68.2927	73.3333	77.5701	94.6043	94.7436
						c	+2	4	4	5	12	21	13	2.8777	4.87805	5.55556	11.215	2.51799	1.66667
						t	+3	6	3	8	5	17	19	4.31655	3.65854	8.88889	4.6729	2.03837	2.4359
						g	+4	1	0	1	1	1	3	0.719424	0	1.11111	0.934579	0.119904	0.384615
tgggattgaaaacgggtcattctaccgccatctcccatatAtca	tA	3327731 (-)	rlmE (b3179)	-67	94.654	t	-3	0	0	0	0	0	0	0	0	0	0	0	0
						a	-2	0	0	1	0	0	0	0	0	0.411523	0	0	0
						t	-1	27	23	0	0	1	0	27.8351	33.8235	0	0	0.440529	0
						A	+1	67	39	234	305	209	176	69.0722	57.3529	96.2963	94.4272	92.0705	97.2376
						t	+2	2	5	4	14	15	3	2.06186	7.35294	1.64609	4.33437	6.60793	1.65746
						c	+3	1	0	1	0	1	2	1.03093	0	0.411523	0	0.440529	1.10497
						a	+4	0	1	3	4	1	0	0	1.47059	1.23457	1.23839	0.440529	0
gataacggcaaagggcttcgttttttcctatacttattcaGcac	aG	2228958 (+)	yohP (b4679)	-24	94.6248	t	-3	0	0	0	0	0	0	0	0	0	0	0	0
						c	-2	1	2	0	0	0	4	0.25	0.694444	0	0	0	0.0843348
						a	-1	18	16	26	16	39	26	4.5	5.55556	7.00809	6.20155	1.14135	0.548176
						G	+1	338	248	318	214	3224	4501	84.5	86.1111	85.7143	82.9457	94.3518	94.8977
						c	+2	21	9	10	12	103	140	5.25	3.125	2.69542	4.65116	3.01434	2.95172
						a	+3	22	11	17	16	49	69	5.5	3.81944	4.58221	6.20155	1.43401	1.45478
						c	+4	0	2	0	0	2	3	0	0.694444	0	0	0.0585309	0.0632511
agcgtaagctgaaactggcaggctccgctaaaattactacGctt	cG	2797085 (-)	yqaE (b2666)	-57	94.6045	t	-3	0	0	0	0	0	0	0	0	0	0	0	0
						a	-2	0	0	0	0	0	0	0	0	0	0	0	0
						c	-1	0	0	0	0	1	0	0	0	0	0	0.126582	0
						G	+1	82	55	66	80	751	788	89.1304	84.6154	98.5075	91.954	95.0633	94.1458
						c	+2	8	7	1	6	27	32	8.69565	10.7692	1.49254	6.89655	3.41772	3.82318
						t	+3	2	1	0	1	11	13	2.17391	1.53846	0	1.14943	1.39241	1.55317
						t	+4	0	2	0	0	0	4	0	3.07692	0	0	0	0.477897
tatcctggcgaagccgcgtaagtaacatatgctgaatagtGtta	tG	2943213 (-)	ygdI (b2809)	-68	94.6045	a	-3	0	0	0	0	2	3	0	0	0	0	0.00703755	0.0125089
						g	-2	96	52	26	9	744	573	4	2.94284	3.99386	2.38095	2.61797	2.38919
						t	-1	10	11	0	3	57	49	0.416667	0.622524	0	0.793651	0.20057	0.204311
						G	+1	2179	1583	601	352	26856	22714	90.7917	89.5869	92.3195	93.1217	94.5002	94.7088
						t	+2	107	108	22	12	663	552	4.45833	6.11205	3.37942	3.1746	2.33295	2.30163
						t	+3	5	11	1	0	67	75	0.208333	0.622524	0.15361	0	0.235758	0.312722
						a	+4	3	2	1	2	30	17	0.125	0.113186	0.15361	0.529101	0.105563	0.0708835
caccttgcgaaacagagtttatcttcgtaggcttagacttGcat	tG	214163 (-)	yaeP (b4406)	-38	94.551	c	-3	18	10	9	17	0	2	8.25688	6.75676	5.625	10.8974	0	0.270636
						t	-2	7	4	1	1	0	1	3.21101	2.7027	0.625	0.641026	0	0.135318
						t	-1	22	16	28	15	16	20	10.0917	10.8108	17.5	9.61538	2.53968	2.70636
						G	+1	155	96	116	114	598	696	71.1009	64.8649	72.5	73.0769	94.9206	94.1813
						c	+2	7	16	2	3	12	19	3.21101	10.8108	1.25	1.92308	1.90476	2.57104
						a	+3	8	6	4	5	4	1	3.66972	4.05405	2.5	3.20513	0.634921	0.135318
						t	+4	1	0	0	1	0	0	0.458716	0	0	0.641026	0	0
ttttgttgtatgattgaaattagcggcctatactaatttcGagt	cG	1741201 (+)	cfa (b1661)	-212	94.5414	t	-3	1	2	2	2	0	0	0.411523	1.08696	0.533333	0.555556	0	0
						t	-2	1	0	1	0	0	0	0.411523	0	0.266667	0	0	0
						c	-1	6	4	0	2	1	0	2.46914	2.17391	0	0.555556	0.074129	0
						G	+1	213	158	335	327	1268	1200	87.6543	85.8696	89.3333	90.8333	93.9956	95.0872
						a	+2	16	14	31	24	78	58	6.58436	7.6087	8.26667	6.66667	5.78206	4.59588
						g	+3	0	1	3	3	2	4	0	0.543478	0.8	0.833333	0.148258	0.316957
						t	+4	6	5	3	2	0	0	2.46914	2.71739	0.8	0.555556	0	0
cacatttgcgcgatcgccaaccgtgaacgacacttgcagtGgga	tG	4363330 (-)	yjdC (b4135)	-22	94.4528	a	-3	0	0	0	0	0	0	0	0	0	0	0	0
						g	-2	0	1	0	0	0	0	0	0.420168	0	0	0	0
						t	-1	3	0	0	1	2	0	0.857143	0	0	0.78125	0.131406	0
						G	+1	298	200	133	112	1434	1212	85.1429	84.0336	90.4762	87.5	94.2181	94.6875
						g	+2	15	12	3	4	58	41	4.28571	5.04202	2.04082	3.125	3.81078	3.20312
						g	+3	24	17	10	6	27	25	6.85714	7.14286	6.80272	4.6875	1.77398	1.95312
						a	+4	10	8	1	5	1	2	2.85714	3.36134	0.680272	3.90625	0.065703	0.15625
aagccctttacttagcttaaaaaaggctaaactatttcctGact	tG	4640803 (-)	arcA (b4401)	-497	94.4352	c	-3	0	0	0	0	0	0	0	0	0	0	0	0
						c	-2	0	0	0	0	0	0	0	0	0	0	0	0
						t	-1	0	1	0	2	11	3	0	1.04167	0	3.38983	1.25571	0.451807
						G	+1	140	86	74	53	826	628	93.3333	89.5833	91.358	89.8305	94.2922	94.5783
						a	+2	8	4	7	3	32	33	5.33333	4.16667	8.64198	5.08475	3.65297	4.96988
						c	+3	1	3	0	1	6	0	0.666667	3.125	0	1.69492	0.684932	0
						t	+4	1	2	0	0	1	0	0.666667	2.08333	0	0	0.114155	0
aaaggtggaggcaatgtcagtggtgtgtgacaataagagtAtcg	tA	4478445 (+)	rraB (b4255)	-28	94.3868	a	-3	0	0	0	0	0	0	0	0	0	0	0	0
						g	-2	0	3	0	0	0	0	0	2.43902	0	0	0	0
						t	-1	73	38	3	1	0	0	29.0837	30.8943	1.66667	0.724638	0	0
						A	+1	175	73	173	129	144	205	69.7211	59.3496	96.1111	93.4783	94.7368	94.0367
						t	+2	2	8	2	4	3	10	0.796813	6.50407	1.11111	2.89855	1.97368	4.58716
						c	+3	0	0	0	0	0	1	0	0	0	0	0	0.458716
						g	+4	1	1	2	4	5	2	0.398406	0.813008	1.11111	2.89855	3.28947	0.917431
cttcccgcaagagtgaatgcggttacctacactccagattActg	tA	1495265 (+)	ydcJ (b1423)	-23	94.3518	a	-3	0	0	0	0	0	0	0	0	0	0	0	0
						t	-2	1	1	0	0	0	0	0.1287	0.266667	0	0	0	0
						t	-1	72	38	11	18	128	143	9.26641	10.1333	3.125	5.12821	3.4097	3.19339
						A	+1	679	329	334	328	3537	4231	87.3874	87.7333	94.8864	93.4473	94.2195	94.4841
						c	+2	23	7	7	4	73	92	2.9601	1.86667	1.98864	1.1396	1.94459	2.05449
						t	+3	2	0	0	1	9	10	0.2574	0	0	0.2849	0.239744	0.223314
						g	+4	0	0	0	0	7	2	0	0	0	0	0.186468	0.0446628
cattaagattttcctcaggtaaccacctatagtcattgtcGtta	cG	2349499 (-)	inaA (b2237)	-27	94.3487	g	-3	3	0	1	3	7	5	1.32743	0	0.333333	1.52284	0.397953	0.233645
						t	-2	0	1	1	1	0	0	0	1.06383	0.333333	0.507614	0	0
						c	-1	30	15	40	28	38	45	13.2743	15.9574	13.3333	14.2132	2.16032	2.1028
						G	+1	185	72	251	160	1658	2021	81.8584	76.5957	83.6667	81.2183	94.2581	94.4393
						t	+2	7	6	6	5	51	58	3.09735	6.38298	2	2.53807	2.89937	2.71028
						t	+3	0	0	1	0	3	6	0	0	0.333333	0	0.170551	0.280374
						a	+4	1	0	0	0	2	5	0.442478	0	0	0	0.113701	0.233645
tgtggttgaatcttttttcaactacatctagtatctctgtAtca	tA	2800656 (+)	nrdH (b2673)	-67	94.348	t	-3	0	0	0	0	0	0	0	0	0	0	0	0
						g	-2	0	1	0	0	1	0	0	0.869565	0	0	0.934579	0
						t	-1	29	25	0	1	0	0	21.9697	21.7391	0	0.549451	0	0
						A	+1	91	85	109	170	100	80	68.9394	73.913	94.7826	93.4066	93.4579	95.2381
						t	+2	7	1	2	8	4	3	5.30303	0.869565	1.73913	4.3956	3.73832	3.57143
						c	+3	1	0	1	1	0	0	0.757576	0	0.869565	0.549451	0	0
						a	+4	4	3	3	2	2	1	3.0303	2.6087	2.6087	1.0989	1.86916	1.19048
tatcgtcggcgtaccagacggtgtgtggtatacttacgggGttt	gG	4394092 (-)	queG (b4166)	-25	94.338	g	-3	0	0	0	0	0	0	0	0	0	0	0	0
						g	-2	0	0	0	0	0	1	0	0	0	0	0	0.282486
						g	-1	112	56	29	26	7	10	80	81.1594	35.8025	36.6197	3.04348	2.82486
						G	+1	22	12	48	40	215	337	15.7143	17.3913	59.2593	56.338	93.4783	95.1977
						t	+2	3	1	3	3	8	5	2.14286	1.44928	3.7037	4.22535	3.47826	1.41243
						t	+3	2	0	0	2	0	0	1.42857	0	0	2.8169	0	0
						t	+4	1	0	1	0	0	1	0.714286	0	1.23457	0	0	0.282486
tgaagttaacggatgtatccgtttagtctatgatatgtacAgca	cA	1801346 (-)	infC (b1718)	-708	94.3188	t	-3	2	7	0	1	2	2	0.581395	2.10843	0	0.338983	0.0546896	0.0565291
						a	-2	4	1	0	0	7	10	1.16279	0.301205	0	0	0.191414	0.282646
						c	-1	1	0	0	0	2	8	0.290698	0	0	0	0.0546896	0.226116
						A	+1	316	311	264	273	3442	3344	91.8605	93.6747	97.7778	92.5424	94.1209	94.5167
						g	+2	17	12	6	15	181	162	4.94186	3.61446	2.22222	5.08475	4.94941	4.57886
						c	+3	4	1	0	3	12	11	1.16279	0.301205	0	1.01695	0.328138	0.31091
						a	+4	0	0	0	3	11	1	0	0	0	1.01695	0.300793	0.0282646
gcaaactggaaaacctggcgtcgtcatctattcttaaaggGcaa	gG	1923206 (-)	sdsR (b4433)	78	94.2898	a	-3	0	0	0	0	1	0	0	0	0	0	0.00515225	0
						g	-2	1	0	0	0	0	0	0.0379363	0	0	0	0	0
						g	-1	252	366	31	15	43	45	9.55994	10.0494	0.829987	0.860092	0.221547	0.14669
						G	+1	2210	3016	3491	1649	18218	29056	83.8392	82.8116	93.4672	94.5528	93.8637	94.7159
						c	+2	43	76	79	36	334	515	1.63126	2.08677	2.11513	2.06422	1.72085	1.67878
						a	+3	118	168	122	35	792	1030	4.47648	4.61285	3.2664	2.00688	4.08058	3.35756
						a	+4	12	16	12	9	21	31	0.455235	0.439319	0.321285	0.516055	0.108197	0.101053
tgctttgcgtccctatgcgtttacctgtgcacaataaattAccg	tA	4416370 (-)	yjfN (b4188)	-78	94.1926	a	-3	8	5	7	11	0	1	2.91971	2.23214	2.78884	2.72277	0	0.117233
						t	-2	10	0	12	9	0	1	3.64964	0	4.78088	2.22772	0	0.117233
						t	-1	26	25	3	2	1	1	9.48905	11.1607	1.19522	0.49505	0.0892857	0.117233
						A	+1	221	180	208	361	1049	808	80.6569	80.3571	82.8685	89.3564	93.6607	94.7245
						c	+2	5	7	11	12	42	26	1.82482	3.125	4.38247	2.9703	3.75	3.04807
						c	+3	4	4	3	4	12	7	1.45985	1.78571	1.19522	0.990099	1.07143	0.820633
						g	+4	0	3	7	5	16	9	0	1.33929	2.78884	1.23762	1.42857	1.0551
ggcattgccatttcctgagctcctggctaacgtaggagatGagg	tG	3432603 (-)	smg (b3284)	-139	94.1676	g	-3	11	4	17	32	23	42	5.69948	2.54777	10.4294	11.0727	2.02287	2.47204
						a	-2	0	0	1	1	2	2	0	0	0.613497	0.346021	0.175901	0.117716
						t	-1	2	0	1	2	7	9	1.03627	0	0.613497	0.692042	0.615655	0.529723
						G	+1	166	138	138	244	1082	1583	86.0104	87.8981	84.6626	84.4291	95.1627	93.1725
						a	+2	11	12	6	8	19	46	5.69948	7.64331	3.68098	2.76817	1.67106	2.70747
						g	+3	0	0	0	1	4	13	0	0	0	0.346021	0.351803	0.765156
						g	+4	3	3	0	1	0	4	1.5544	1.91083	0	0.346021	0	0.235433
agtcttccctttcgccccccgtctggtctacatttgggggGcga	gG	4200176 (+)	hupA (b4000)	-105	94.1252	g	-3	0	0	0	0	0	0	0	0	0	0	0	0
						g	-2	0	0	0	0	0	0	0	0	0	0	0	0
						g	-1	15	10	1	1	5	3	7.77202	4.71698	0.581395	0.462963	0.392157	0.331126
						G	+1	155	169	151	184	1204	850	80.3109	79.717	87.7907	85.1852	94.4314	93.819
						c	+2	7	8	3	6	33	19	3.62694	3.77358	1.74419	2.77778	2.58824	2.09713
						g	+3	13	21	15	20	31	32	6.73575	9.90566	8.72093	9.25926	2.43137	3.53201
						a	+4	3	4	2	5	2	2	1.5544	1.88679	1.16279	2.31481	0.156863	0.220751
ttgcattgaacttgtggataaaatcacggtctgataaaacAgtg	cA	3600870 (-)	rpoH (b3461)	-87	94.1118	a	-3	1	3	0	1	0	0	0.413223	2.32558	0	0.152672	0	0
						a	-2	36	16	4	3	3	5	14.876	12.4031	0.761905	0.458015	1.59574	2.68817
						c	-1	11	8	2	1	1	5	4.54545	6.20155	0.380952	0.152672	0.531915	2.68817
						A	+1	171	90	505	619	179	173	70.6612	69.7674	96.1905	94.5038	95.2128	93.0108
						g	+2	4	5	10	13	5	3	1.65289	3.87597	1.90476	1.98473	2.65957	1.6129
						t	+3	16	4	3	14	0	0	6.61157	3.10078	0.571429	2.1374	0	0
						g	+4	3	3	1	4	0	0	1.23967	2.32558	0.190476	0.610687	0	0
atcggtaataatcctaacgccttccggttattattgcgggAacg	gA	4161458 (+)	yijD (b3964)	-313	94.076	g	-3	0	0	0	0	1	0	0	0	0	0	0.0996016	0
						g	-2	2	1	0	0	0	0	1.7094	0.806452	0	0	0	0
						g	-1	8	2	0	2	10	3	6.83761	1.6129	0	1.37931	0.996016	0.533808
						A	+1	102	115	76	138	944	529	87.1795	92.7419	97.4359	95.1724	94.0239	94.1281
						a	+2	3	5	1	4	37	24	2.5641	4.03226	1.28205	2.75862	3.68526	4.27046
						c	+3	1	1	1	0	11	4	0.854701	0.806452	1.28205	0	1.09562	0.711744
						g	+4	1	0	0	1	1	2	0.854701	0	0	0.689655	0.0996016	0.355872
aatccagccgggagcaccgttatatgatacgattgttattGtca	tG	4500504 (-)	insG (b4278)	2927	93.9718	a	-3	2	0	0	0	1	1	1.69492	0	0	0	0.0925926	0.125945
						t	-2	3	2	0	0	0	1	2.54237	2.53165	0	0	0	0.125945
						t	-1	44	27	23	31	51	30	37.2881	34.1772	31.5068	32.6316	4.72222	3.77834
						G	+1	68	48	49	63	1011	749	57.6271	60.7595	67.1233	66.3158	93.6111	94.3325
						t	+2	1	2	1	1	16	13	0.847458	2.53165	1.36986	1.05263	1.48148	1.63728
						c	+3	0	0	0	0	1	0	0	0	0	0	0.0925926	0
						a	+4	0	0	0	0	0	0	0	0	0	0	0	0
ggaacagattaacatcatcagcacagcctatactttttttAatg	tA	2766860 (+)	rnlB (b2631)	-124	93.9571	t	-3	7	4	4	6	0	1	2.95359	3.36134	3.66972	4.72441	0	0.0786782
						t	-2	2	1	0	5	3	0	0.843882	0.840336	0	3.93701	0.205761	0
						t	-1	48	30	0	2	2	0	20.2532	25.2101	0	1.5748	0.137174	0
						A	+1	171	79	95	109	1377	1188	72.1519	66.3866	87.156	85.8268	94.4444	93.4697
						a	+2	8	3	4	2	56	59	3.37553	2.52101	3.66972	1.5748	3.84088	4.64201
						t	+3	0	2	3	3	8	9	0	1.68067	2.75229	2.3622	0.548697	0.708104
						g	+4	1	0	3	0	12	14	0.421941	0	2.75229	0	0.823045	1.10149
ccacttggctaaatgtaaaaaaatggttaagactatgatcAggt	cA	2460509 (-)	fadI (b2342)	-40	93.9399	a	-3	0	0	0	0	0	0	0	0	0	0	0	0
						t	-2	0	0	1	0	0	0	0	0	0.653595	0	0	0
						c	-1	0	5	7	15	10	17	0	4.62963	4.57516	5.76923	1.26422	1.32605
						A	+1	117	99	144	234	734	1219	92.8571	91.6667	94.1176	90	92.7939	95.0858
						g	+2	5	0	1	6	33	39	3.96825	0	0.653595	2.30769	4.17193	3.04212
						g	+3	3	3	0	4	10	7	2.38095	2.77778	0	1.53846	1.26422	0.546022
						t	+4	1	1	0	1	4	0	0.793651	0.925926	0	0.384615	0.505689	0
accaggagacacaaagcgaaagctatgctaaaacagtcagGatg	gG	3485953 (+)	crp (b3357)	-167	93.9162	c	-3	0	0	0	0	0	1	0	0	0	0	0	0.0273373
						a	-2	0	1	1	0	0	0	0	0.252525	0.172117	0	0	0
						g	-1	151	93	37	25	2	6	22.6387	23.4848	6.36833	3.52609	0.0737463	0.164024
						G	+1	464	280	504	641	2534	3453	69.5652	70.7071	86.747	90.409	93.4366	94.3958
						a	+2	49	19	34	40	165	179	7.34633	4.79798	5.85198	5.64175	6.08407	4.89338
						t	+3	3	1	3	1	3	13	0.449775	0.252525	0.516351	0.141044	0.110619	0.355385
						g	+4	0	2	2	2	8	6	0	0.505051	0.344234	0.282087	0.294985	0.164024
agagttgacatagtgcgcgtttgcttttaggttagcgaccGaaa	cG	624831 (+)	entC (b0593)	-54	93.8894	a	-3	0	0	0	0	0	0	0	0	0	0	0	0
						c	-2	0	0	0	0	0	0	0	0	0	0	0	0
						c	-1	3	0	0	3	4	3	2.43902	0	0	0.977199	1.42857	1.46341
						G	+1	110	76	201	287	269	188	89.4309	96.2025	95.2607	93.4853	96.0714	91.7073
						a	+2	8	3	9	12	6	12	6.50407	3.79747	4.2654	3.90879	2.14286	5.85366
						a	+3	2	0	0	3	1	2	1.62602	0	0	0.977199	0.357143	0.97561
						a	+4	0	0	1	2	0	0	0	0	0.473934	0.651466	0	0
gtgctggttttataacctgcatgtactgtatgattatccaGtta	aG	3647982 (-)	dinQ (b4613)	-149	93.8097	c	-3	0	0	0	0	0	0	0	0	0	0	0	0
						c	-2	0	0	0	0	0	0	0	0	0	0	0	0
						a	-1	4	4	3	3	26	26	4.54545	3.8835	3.22581	2.08333	2.09003	2.58964
						G	+1	76	90	84	137	1173	937	86.3636	87.3786	90.3226	95.1389	94.2926	93.3267
						t	+2	5	6	3	4	28	25	5.68182	5.82524	3.22581	2.77778	2.2508	2.49004
						t	+3	2	0	0	0	5	9	2.27273	0	0	0	0.401929	0.896414
						a	+4	1	3	3	0	12	7	1.13636	2.91262	3.22581	0	0.96463	0.697211
gtataaagacggattgttgatgatgtgttaaaattgatgtAaac	tA	2278276 (-)	yejG (b2181)	-39	93.8044	t	-3	1	0	0	1	0	0	0.769231	0	0	1.19048	0	0
						g	-2	3	2	0	1	2	1	2.30769	2.0202	0	1.19048	1.88679	0.961538
						t	-1	55	36	1	1	1	0	42.3077	36.3636	1.66667	1.19048	0.943396	0
						A	+1	63	57	52	67	100	97	48.4615	57.5758	86.6667	79.7619	94.3396	93.2692
						a	+2	3	1	4	4	1	5	2.30769	1.0101	6.66667	4.7619	0.943396	4.80769
						a	+3	3	0	3	6	1	1	2.30769	0	5	7.14286	0.943396	0.961538
						c	+4	2	3	0	4	1	0	1.53846	3.0303	0	4.7619	0.943396	0
agctgcggctggccgtgcgttagatgctattattgcttccGtaa	cG	461544 (+)	hupB (b0440)	93	93.7679	t	-3	0	1	0	1	1	1	0	0.497512	0	0.421941	0.0448632	0.11976
						c	-2	0	0	1	1	0	0	0	0	0.49505	0.421941	0	0
						c	-1	2	2	1	0	6	3	0.760456	0.995025	0.49505	0	0.269179	0.359281
						G	+1	224	162	163	185	2106	777	85.1711	80.597	80.6931	78.0591	94.4818	93.0539
						t	+2	7	9	8	14	57	24	2.6616	4.47761	3.9604	5.90717	2.5572	2.87425
						a	+3	19	18	17	28	57	27	7.22433	8.95522	8.41584	11.8143	2.5572	3.23353
						a	+4	11	9	12	8	2	3	4.18251	4.47761	5.94059	3.37553	0.0897263	0.359281
gtttatcgttggtttagttgtcagcaggtattatatcgccAtag	cA	4467362 (+)	mgtL (b4702)	-69	93.6369	g	-3	0	0	0	0	0	0	0	0	0	0	0	0
						c	-2	0	0	0	0	0	0	0	0	0	0	0	0
						c	-1	17	10	0	1	0	1	9.65909	9.90099	0	0.46729	0	0.160514
						A	+1	144	83	94	184	622	584	81.8182	82.1782	89.5238	85.9813	93.5338	93.74
						t	+2	6	2	3	2	20	12	3.40909	1.9802	2.85714	0.934579	3.00752	1.92616
						a	+3	9	6	7	24	21	22	5.11364	5.94059	6.66667	11.215	3.15789	3.5313
						g	+4	0	0	1	3	2	4	0	0	0.952381	1.40187	0.300752	0.642055
gggattccacttctgtggaattaacggttatagtggcataAtca	aA	3380126 (+)	yhcB (b3233)	-65	93.6276	a	-3	0	0	0	0	0	0	0	0	0	0	0	0
						t	-2	0	1	0	0	0	1	0	0.862069	0	0	0	0.112233
						a	-1	9	8	11	16	29	20	6.42857	6.89655	4.7619	4.73373	3.97805	2.24467
						A	+1	123	100	210	309	677	841	87.8571	86.2069	90.9091	91.4201	92.8669	94.3883
						t	+2	5	6	5	8	14	17	3.57143	5.17241	2.1645	2.36686	1.92044	1.90797
						c	+3	2	0	2	1	7	0	1.42857	0	0.865801	0.295858	0.960219	0
						a	+4	1	1	3	4	2	12	0.714286	0.862069	1.2987	1.18343	0.274348	1.3468
ttatctcgtcgcgacctataagtttgggtaatatgtgctgGaat	gG	3792577 (-)	kbl (b3617)	-26	93.6155	c	-3	0	0	0	0	0	0	0	0	0	0	0	0
						t	-2	0	0	0	0	0	0	0	0	0	0	0	0
						g	-1	32	18	6	3	1	1	28.8288	19.1489	4.87805	2.54237	1.08696	1.05263
						G	+1	65	63	99	91	88	87	58.5586	67.0213	80.4878	77.1186	95.6522	91.5789
						a	+2	6	7	12	14	2	5	5.40541	7.44681	9.7561	11.8644	2.17391	5.26316
						a	+3	4	2	4	1	1	1	3.6036	2.12766	3.25203	0.847458	1.08696	1.05263
						t	+4	4	4	2	9	0	1	3.6036	4.25532	1.62602	7.62712	0	1.05263
cacggtagcgaaacgttagtttgaatggaaagatgcctgcAgac	cA	987092 (-)	ompF (b0929)	-110	93.6094	t	-3	0	0	0	0	0	0	0	0	0	0	0	0
						g	-2	0	0	0	0	0	0	0	0	0	0	0	0
						c	-1	0	0	0	0	0	0	0	0	0	0	0	0
						A	+1	400	223	402	520	482	434	88.6918	90.2834	77.7563	77.381	92.8709	94.3478
						g	+2	25	9	103	133	34	23	5.54324	3.64372	19.9226	19.7917	6.55106	5
						a	+3	25	15	10	14	0	2	5.54324	6.07287	1.93424	2.08333	0	0.434783
						c	+4	1	0	2	5	3	1	0.221729	0	0.386847	0.744048	0.578035	0.217391
aagtgttctccacaaaggaatgtagtggtagtgtagcgatGact	tG	200399 (+)	skp (b0178)	-83	93.5496	g	-3	0	0	0	0	1	2	0	0	0	0	0.0512558	0.102249
						a	-2	3	0	0	1	0	1	0.864553	0	0	0.15949	0	0.0511247
						t	-1	2	0	0	0	1	0	0.576369	0	0	0	0.0512558	0
						G	+1	304	159	598	558	1818	1837	87.6081	90.8571	90.0602	88.9952	93.183	93.9162
						a	+2	23	10	41	40	121	112	6.62824	5.71429	6.1747	6.37959	6.20195	5.72597
						c	+3	8	1	15	8	9	4	2.30548	0.571429	2.25904	1.27592	0.461302	0.204499
						t	+4	7	5	10	20	1	0	2.01729	2.85714	1.50602	3.18979	0.0512558	0
tcaccccgctgtgtctgcttttcccgactattcttaatgaGctt	aG	3719431 (+)	yiaG (b3555)	-47	93.4696	t	-3	0	0	0	0	0	0	0	0	0	0	0	0
						g	-2	0	1	0	1	8	3	0	0.393701	0	0.595238	0.282386	0.135318
						a	-1	36	22	22	19	120	91	11.25	8.66142	7.66551	11.3095	4.23579	4.10465
						G	+1	278	216	250	140	2647	2073	86.875	85.0394	87.108	83.3333	93.4345	93.5047
						c	+2	5	13	11	8	47	44	1.5625	5.11811	3.83275	4.7619	1.65902	1.98466
						t	+3	1	2	3	0	9	6	0.3125	0.787402	1.0453	0	0.317684	0.270636
						t	+4	0	0	1	0	2	0	0	0	0.348432	0	0.0705965	0
gtacttctcgcttttggcggtatccggtacactgcattttGtct	tG	243512 (+)	gmhA (b0222)	-31	93.446	t	-3	1	0	0	0	0	0	1.36986	0	0	0	0	0
						t	-2	4	0	1	0	0	0	5.47945	0	1.14943	0	0	0
						t	-1	12	7	12	14	19	11	16.4384	11.6667	13.7931	14	4.77387	2.92553
						G	+1	55	51	70	81	367	356	75.3425	85	80.4598	81	92.2111	94.6809
						t	+2	0	2	3	3	11	8	0	3.33333	3.44828	3	2.76382	2.12766
						c	+3	1	0	0	2	1	0	1.36986	0	0	2	0.251256	0
						t	+4	0	0	1	0	0	1	0	0	1.14943	0	0	0.265957
gtttattttttttgtaaaggaaatattatacatttgttgcAtat	cA	2725834 (+)	yfiM (b2586)	1706	93.3715	t	-3	0	0	0	0	6	3	0	0	0	0	0.45045	0.344432
						g	-2	7	3	3	8	44	33	1.74564	1.57895	1.09091	3.65297	3.3033	3.78875
						c	-1	0	0	0	1	2	1	0	0	0	0.456621	0.15015	0.114811
						A	+1	371	179	263	199	1238	817	92.5187	94.2105	95.6364	90.8676	92.9429	93.8002
						t	+2	19	7	6	9	34	14	4.73815	3.68421	2.18182	4.10959	2.55255	1.60735
						a	+3	3	1	3	2	8	3	0.74813	0.526316	1.09091	0.913242	0.600601	0.344432
						t	+4	1	0	0	0	0	0	0.249377	0	0	0	0	0
aaggttgtgaaaggtcatcaggcagggctattgtaatcaaAggg	aA	2926272 (+)	ygdH (b2795)	-36	93.3692	c	-3	0	0	0	0	0	0	0	0	0	0	0	0
						a	-2	0	0	0	0	1	1	0	0	0	0	0.242718	0.215517
						a	-1	0	0	0	1	4	8	0	0	0	1.05263	0.970874	1.72414
						A	+1	100	66	67	92	384	434	95.2381	97.0588	98.5294	96.8421	93.2039	93.5345
						g	+2	3	0	1	0	22	20	2.85714	0	1.47059	0	5.33981	4.31034
						g	+3	2	2	0	2	1	1	1.90476	2.94118	0	2.10526	0.242718	0.215517
						g	+4	0	0	0	0	0	0	0	0	0	0	0	0
gtgcaggcaagttttccatttgccatctacgcttaattttGaag	tG	1866747 (+)	yeaG (b1783)	-161	93.3679	t	-3	0	0	0	0	0	0	0	0	0	0	0	0
						t	-2	0	4	0	0	0	0	0	2.05128	0	0	0	0
						t	-1	27	9	13	7	57	56	8.6262	4.61538	10.4839	7.77778	3.42754	4.51249
						G	+1	271	170	110	81	1559	1154	86.5815	87.1795	88.7097	90	93.7462	92.9895
						a	+2	14	11	0	2	42	27	4.47284	5.64103	0	2.22222	2.52556	2.17566
						a	+3	1	0	0	0	5	2	0.319489	0	0	0	0.300661	0.16116
						g	+4	0	1	1	0	0	2	0	0.512821	0.806452	0	0	0.16116
tggtcacagcaaactcatatttcccgtctatgctttcagaGcaa	aG	945616 (-)	ycaC (b0897)	-59	93.3528	a	-3	0	0	0	0	0	0	0	0	0	0	0	0
						g	-2	0	0	0	0	0	0	0	0	0	0	0	0
						a	-1	1	0	0	0	0	5	0.892857	0	0	0	0	0.684932
						G	+1	55	61	64	51	758	673	49.1071	77.2152	71.1111	62.963	94.5137	92.1918
						c	+2	4	3	2	3	21	20	3.57143	3.79747	2.22222	3.7037	2.61845	2.73973
						a	+3	49	14	24	26	23	29	43.75	17.7215	26.6667	32.0988	2.86783	3.9726
						a	+4	3	1	0	1	0	3	2.67857	1.26582	0	1.23457	0	0.410959
ttgatgttgttttggctgaacggtagggtatattgtcaccAcct	cA	3384472 (-)	mdh (b3236)	-204	93.302	a	-3	3	1	3	2	2	3	1.25	0.657895	0.831025	0.522193	2.15054	4.16667
						c	-2	0	0	0	0	0	0	0	0	0	0	0	0
						c	-1	1	0	0	0	0	0	0.416667	0	0	0	0	0
						A	+1	228	147	341	371	87	67	95	96.7105	94.4598	96.8668	93.5484	93.0556
						c	+2	1	1	10	8	3	2	0.416667	0.657895	2.77008	2.08877	3.22581	2.77778
						c	+3	4	1	3	1	0	0	1.66667	0.657895	0.831025	0.261097	0	0
						t	+4	3	2	4	1	1	0	1.25	1.31579	1.10803	0.261097	1.07527	0
agctgcaatggaaacggtaaaagcggctagtatttaaaggGatg	gG	454434 (+)	bolA (b0435)	-38	93.2983	a	-3	2	0	0	1	3	3	0.0262881	0	0	0.0402576	0.00675752	0.00460017
						g	-2	214	112	109	126	409	524	2.81283	3.00349	2.91055	5.07246	0.921275	0.803496
						g	-1	1283	569	292	194	1221	1775	16.8638	15.2588	7.79706	7.80998	2.75031	2.72177
						G	+1	5895	2914	3220	2102	41382	60900	77.4842	78.1443	85.9813	84.6216	93.2132	93.3834
						a	+2	181	126	109	52	1215	1764	2.37907	3.37892	2.91055	2.0934	2.73679	2.7049
						t	+3	20	7	6	3	129	168	0.262881	0.187718	0.160214	0.120773	0.290573	0.257609
						g	+4	13	1	9	6	36	81	0.170873	0.0268168	0.24032	0.241546	0.0810902	0.124205
aatttgacaatcattcaacaaagttgttacaaacattaccAgga	cA	754795 (-)	gltA (b0720)	-327	93.2863	a	-3	1	0	2	0	0	0	0.398406	0	0.70922	0	0	0
						c	-2	0	2	0	1	0	0	0	1.37931	0	0.326797	0	0
						c	-1	11	6	6	5	10	8	4.38247	4.13793	2.12766	1.63399	2.35849	1.88235
						A	+1	199	116	252	273	396	396	79.2829	80	89.3617	89.2157	93.3962	93.1765
						g	+2	9	2	12	14	14	13	3.58566	1.37931	4.25532	4.57516	3.30189	3.05882
						g	+3	20	13	5	10	3	7	7.96813	8.96552	1.77305	3.26797	0.707547	1.64706
						a	+4	11	6	5	3	1	1	4.38247	4.13793	1.77305	0.980392	0.235849	0.235294
ttcccccaaagttaaattaataaggcactacactatggttAgca	tA	4416764 (-)	bsmA (b4189)	6	93.2834	g	-3	0	1	0	0	0	0	0	0.502513	0	0	0	0
						t	-2	0	0	0	0	0	0	0	0	0	0	0	0
						t	-1	15	6	0	0	1	2	5.20833	3.01508	0	0	0.0657895	0.130548
						A	+1	258	173	315	206	1419	1428	89.5833	86.9347	95.1662	97.1698	93.3553	93.2115
						g	+2	10	7	13	4	85	90	3.47222	3.51759	3.92749	1.88679	5.59211	5.87467
						c	+3	3	8	2	2	10	7	1.04167	4.0201	0.60423	0.943396	0.657895	0.456919
						a	+4	2	4	1	0	5	5	0.694444	2.01005	0.302115	0	0.328947	0.326371
accatttacattgcagggctattttttataagatgcatttGaga	tG	2685797 (+)	hmp (b2552)	-38	93.2448	t	-3	0	0	0	0	0	0	0	0	0	0	0	0
						t	-2	1	3	0	0	0	0	0.15748	0.714286	0	0	0	0
						t	-1	43	21	2	2	0	0	6.77165	5	0.501253	0.392927	0	0
						G	+1	518	326	366	462	348	396	81.5748	77.619	91.7293	90.7662	94.8229	91.6667
						a	+2	50	52	26	34	7	18	7.87402	12.381	6.51629	6.67976	1.90736	4.16667
						g	+3	3	2	2	5	7	7	0.472441	0.47619	0.501253	0.982318	1.90736	1.62037
						a	+4	20	16	3	6	5	11	3.14961	3.80952	0.75188	1.17878	1.3624	2.5463
ccagattgacttatcctcactaaaggataaaacttataatAtcc	tA	1592480 (-)	hipB (b1508)	-38	93.2143	a	-3	0	0	0	0	0	0	0	0	0	0	0	0
						a	-2	0	1	0	0	0	0	0	1.13636	0	0	0	0
						t	-1	64	49	0	1	0	2	61.5385	55.6818	0	0.980392	0	3.33333
						A	+1	40	37	52	97	54	54	38.4615	42.0455	92.8571	95.098	96.4286	90
						t	+2	0	1	4	4	2	3	0	1.13636	7.14286	3.92157	3.57143	5
						c	+3	0	0	0	0	0	1	0	0	0	0	0	1.66667
						c	+4	0	0	0	0	0	0	0	0	0	0	0	0
cggggtgacaagggcgcgcaaaccctctatactgcgcgccGaag	cG	3270592 (-)	rnpB (b3123)	0	93.1942	g	-3	0	1	0	0	2	0	0	0.00239406	0	0	0.000447624	0
						c	-2	3	4	1	2	12	20	0.0100257	0.00957625	0.00281341	0.00491787	0.00268574	0.00402083
						c	-1	1968	2746	2752	3068	18946	18281	6.57688	6.5741	7.74252	7.54401	4.24034	3.67524
						G	+1	27031	37629	31678	36306	415357	464713	90.3352	90.0862	89.1233	89.2741	92.9618	93.4265
						a	+2	802	1218	950	1099	10837	12437	2.68021	2.91597	2.67274	2.70237	2.42545	2.50035
						a	+3	94	132	125	140	1141	1291	0.31414	0.316016	0.351677	0.344251	0.255369	0.259544
						g	+4	25	40	38	53	509	668	0.0835478	0.0957625	0.10691	0.130324	0.11392	0.134296
gtaaaacgtttcctgtagcaccgtgagttatactttgtatAact	tA	4448430 (+)	chpS (b4224)	-17	93.1526	t	-3	0	0	0	0	0	0	0	0	0	0	0	0
						a	-2	0	1	0	0	0	0	0	0.564972	0	0	0	0
						t	-1	36	18	0	0	0	1	14.2292	10.1695	0	0	0	0.458716
						A	+1	183	141	132	167	229	199	72.332	79.661	84.6154	86.0825	95.0207	91.2844
						a	+2	13	7	10	17	8	14	5.13834	3.9548	6.41026	8.76289	3.3195	6.42202
						c	+3	2	0	1	1	3	1	0.790514	0	0.641026	0.515464	1.24481	0.458716
						t	+4	19	10	13	9	1	3	7.50988	5.64972	8.33333	4.63918	0.414938	1.37615
aaatcgccttcttcgttgcactgtcttattattaggaattGtgt	tG	3201866 (+)	cca (b3056)	-25	93.1455	a	-3	6	12	4	9	1	5	8.4507	23.0769	6.06061	10.4651	0.26178	0.912409
						t	-2	3	2	1	1	2	3	4.22535	3.84615	1.51515	1.16279	0.52356	0.547445
						t	-1	12	1	1	5	10	19	16.9014	1.92308	1.51515	5.81395	2.6178	3.46715
						G	+1	38	30	56	64	361	503	53.5211	57.6923	84.8485	74.4186	94.5026	91.7883
						t	+2	8	2	1	3	7	13	11.2676	3.84615	1.51515	3.48837	1.83246	2.37226
						g	+3	1	0	2	0	1	3	1.40845	0	3.0303	0	0.26178	0.547445
						t	+4	3	5	1	4	0	2	4.22535	9.61538	1.51515	4.65116	0	0.364964
actggcttgacggcaccacgcagacttatatcatttggatGaat	tG	1517612 (+)	ydcY (b1446)	-36	93.0833	g	-3	1	1	1	1	0	0	0.719424	0.769231	0.78125	0.574713	0	0
						a	-2	1	1	1	1	0	0	0.719424	0.769231	0.78125	0.574713	0	0
						t	-1	1	4	1	0	0	0	0.719424	3.07692	0.78125	0	0	0
						G	+1	117	97	112	150	207	226	84.1727	74.6154	87.5	86.2069	92	94.1667
						a	+2	19	26	12	20	18	14	13.6691	20	9.375	11.4943	8	5.83333
						a	+3	0	1	1	2	0	0	0	0.769231	0.78125	1.14943	0	0
						t	+4	0	0	0	0	0	0	0	0	0	0	0	0
atacgcttgcgttcggtggttaagtatgtataatgcgcggGctt	gG	3453441 (-)	rpsJ (b3321)	-171	93.0789	c	-3	1	0	0	0	0	0	1.5873	0	0	0	0	0
						g	-2	0	0	0	0	0	0	0	0	0	0	0	0
						g	-1	2	4	0	0	0	1	3.1746	7.27273	0	0	0	0.242131
						G	+1	56	50	76	59	419	391	88.8889	90.9091	93.8272	98.3333	91.4847	94.6731
						c	+2	3	1	4	0	29	16	4.7619	1.81818	4.93827	0	6.33188	3.87409
						t	+3	0	0	1	0	6	4	0	0	1.23457	0	1.31004	0.968523
						t	+4	1	0	0	1	4	1	1.5873	0	0	1.66667	0.873362	0.242131
tctgattgtaagagagtaaatactcaactatgatagagacGaaa	cG	4190487 (-)	sroH (b4691)	0	93.077	g	-3	0	0	0	0	0	0	0	0	0	0	0	0
						a	-2	0	1	0	0	0	0	0	0.257069	0	0	0	0
						c	-1	4	6	1	3	0	1	1.04439	1.54242	0.250627	0.384615	0	0.0873362
						G	+1	357	369	382	737	1005	1064	93.2115	94.8586	95.7393	94.4872	93.2282	92.9258
						a	+2	16	10	13	32	65	75	4.17755	2.57069	3.25815	4.10256	6.02968	6.55022
						a	+3	4	2	1	4	6	2	1.04439	0.514139	0.250627	0.512821	0.556586	0.174672
						a	+4	2	1	2	4	2	3	0.522193	0.257069	0.501253	0.512821	0.185529	0.262009
tcgccgaaagccaactgcgtctctaccctaatattatggtGgag	tG	333828 (-)	yahB (b0316)	605	93.0223	g	-3	0	0	1	0	2	3	0	0	1.38889	0	0.809717	0.828729
						g	-2	0	0	0	0	0	0	0	0	0	0	0	0
						t	-1	0	1	0	0	0	1	0	1.69492	0	0	0	0.276243
						G	+1	69	52	67	142	233	332	92	88.1356	93.0556	97.2603	94.332	91.7127
						g	+2	4	1	4	3	9	24	5.33333	1.69492	5.55556	2.05479	3.64372	6.62983
						a	+3	2	4	0	0	0	1	2.66667	6.77966	0	0	0	0.276243
						g	+4	0	1	0	1	3	1	0	1.69492	0	0.684932	1.21457	0.276243
gctctcgacgccgccctctgtgctgcctattatttatggcGgtg	cG	1441023 (+)	ydbJ (b4529)	-35	92.969	g	-3	4	2	0	0	8	6	1.99005	1.51515	0	0	0.519481	0.320342
						g	-2	7	3	6	7	50	32	3.48259	2.27273	1.875	1.60183	3.24675	1.70849
						c	-1	7	5	21	16	22	31	3.48259	3.78788	6.5625	3.66133	1.42857	1.6551
						G	+1	165	109	276	386	1418	1758	82.0896	82.5758	86.25	88.3295	92.0779	93.8601
						g	+2	12	7	11	22	37	37	5.97015	5.30303	3.4375	5.03432	2.4026	1.97544
						t	+3	6	5	6	5	5	5	2.98507	3.78788	1.875	1.14416	0.324675	0.266951
						g	+4	0	1	0	1	0	4	0	0.757576	0	0.228833	0	0.213561
caatggtgtttttgtttttatctgctttatacttgaggccGacg	cG	1555739 (-)	maeA (b1479)	-70	92.9631	g	-3	0	0	0	0	0	0	0	0	0	0	0	0
						c	-2	0	0	0	0	0	0	0	0	0	0	0	0
						c	-1	6	5	12	5	36	33	2.51046	3.24675	7.22892	3.73134	2.55319	2.32558
						G	+1	222	143	153	124	1299	1331	92.887	92.8571	92.1687	92.5373	92.1277	93.7984
						a	+2	9	6	0	4	48	39	3.76569	3.8961	0	2.98507	3.40426	2.74841
						c	+3	2	0	1	1	9	9	0.83682	0	0.60241	0.746269	0.638298	0.634249
						g	+4	0	0	0	0	18	7	0	0	0	0	1.2766	0.493305
aagggctacgtcacatggccgcgccgtgtataataagctcGtat	cG	3821386 (+)	gmk (b3648)	-42	92.9243	c	-3	0	0	0	0	0	0	0	0	0	0	0	0
						t	-2	0	0	0	0	0	1	0	0	0	0	0	0.0425713
						c	-1	8	4	3	0	11	6	4.65116	4.0404	2.20588	0	0.652045	0.255428
						G	+1	124	82	105	213	1584	2160	72.093	82.8283	77.2059	79.4776	93.8945	91.954
						t	+2	8	4	1	7	31	59	4.65116	4.0404	0.735294	2.61194	1.83758	2.51171
						a	+3	32	9	27	46	60	120	18.6047	9.09091	19.8529	17.1642	3.55661	5.10856
						t	+4	0	0	0	2	1	3	0	0	0	0.746269	0.0592768	0.127714
gtatcttgaaaatcgggtaattacgacgctaaattaatgcAaga	cA	1792760 (-)	nlpC (b1708)	-29	92.8891	t	-3	0	0	0	0	1	0	0	0	0	0	0.609756	0
						g	-2	0	0	0	0	0	0	0	0	0	0	0	0
						c	-1	0	1	0	0	0	0	0	1.75439	0	0	0	0
						A	+1	67	49	64	92	153	160	89.3333	85.9649	84.2105	74.1935	93.2927	92.4855
						a	+2	6	6	12	28	9	10	8	10.5263	15.7895	22.5806	5.4878	5.78035
						g	+3	0	0	0	1	0	3	0	0	0	0.806452	0	1.7341
						a	+4	2	1	0	3	1	0	2.66667	1.75439	0	2.41935	0.609756	0
cagtgttataggattattaccaaaacattatattaatggtGaga	tG	2578498 (-)	maeB (b2463)	-121	92.8465	g	-3	0	0	1	3	2	1	0	0	1.75439	2.75229	0.584795	0.291545
						g	-2	4	1	2	6	0	1	5.97015	1.88679	3.50877	5.50459	0	0.291545
						t	-1	3	4	2	2	0	0	4.47761	7.54717	3.50877	1.83486	0	0
						G	+1	52	42	47	87	317	319	77.6119	79.2453	82.4561	79.8165	92.6901	93.0029
						a	+2	4	3	3	7	10	15	5.97015	5.66038	5.26316	6.42202	2.92398	4.37318
						g	+3	3	1	2	1	10	7	4.47761	1.88679	3.50877	0.917431	2.92398	2.04082
						a	+4	1	2	0	3	3	0	1.49254	3.77358	0	2.75229	0.877193	0
tgtaacttgaaatgtggaattttacccttatatcaaaggtAaag	tA	1028743 (-)	hspQ (b0966)	-22	92.7666	g	-3	0	0	0	0	0	0	0	0	0	0	0	0
						g	-2	0	3	0	0	0	0	0	1.16732	0	0	0	0
						t	-1	128	116	0	2	0	1	45.8781	45.1362	0	0.46729	0	0.699301
						A	+1	142	128	308	406	169	128	50.8961	49.8054	96.5517	94.8598	96.0227	89.5105
						a	+2	8	4	5	14	3	6	2.86738	1.55642	1.5674	3.27103	1.70455	4.1958
						a	+3	1	2	5	2	2	2	0.358423	0.77821	1.5674	0.46729	1.13636	1.3986
						g	+4	0	4	1	4	2	6	0	1.55642	0.31348	0.934579	1.13636	4.1958
atatcttgtatgtgatccagatcacatctatcatttagttAtcg	tA	1169019 (+)	bhsA (b1112)	-54	92.7638	g	-3	0	0	0	0	0	0	0	0	0	0	0	0
						t	-2	0	1	2	1	0	1	0	0.175131	0.416667	0.0862813	0	0.111111
						t	-1	591	495	7	12	9	54	86.53	86.69	1.45833	1.03538	2.0979	6
						A	+1	73	61	461	1115	406	818	10.6881	10.683	96.0417	96.2036	94.6387	90.8889
						t	+2	5	3	9	21	12	21	0.732064	0.525394	1.875	1.81191	2.7972	2.33333
						c	+3	2	2	0	4	1	4	0.292826	0.350263	0	0.345125	0.2331	0.444444
						g	+4	12	9	1	6	1	2	1.75695	1.57618	0.208333	0.517688	0.2331	0.222222
actggttgatttgaaattcatcatggctgatactggctttGgta	tG	2476376 (+)	torI (b4501)	66	92.6866	t	-3	0	0	0	0	0	0	0	0	0	0	0	0
						t	-2	2	3	0	0	0	0	2.40964	3.94737	0	0	0	0
						t	-1	14	19	5	0	0	2	16.8675	25	4.7619	0	0	0.809717
						G	+1	61	52	93	124	202	229	73.494	68.4211	88.5714	95.3846	92.6606	92.7126
						g	+2	4	0	7	4	16	15	4.81928	0	6.66667	3.07692	7.33945	6.07287
						t	+3	2	2	0	1	0	1	2.40964	2.63158	0	0.769231	0	0.404858
						a	+4	0	0	0	1	0	0	0	0	0	0.769231	0	0
gttgattgtttgtttaaagcaaaggcgtaaagtagcacccAtag	cA	4051036 (+)	csrC (b4457)	0	92.6072	c	-3	4	1	19	17	2	0	0.0124085	0.00397472	0.0222882	0.0216079	0.00587596	0
						c	-2	9	6	12	11	1	2	0.0279191	0.0238483	0.0140767	0.0139816	0.00293798	0.00711187
						c	-1	74	47	71	56	49	23	0.229557	0.186812	0.0832874	0.0711789	0.143961	0.0817865
						A	+1	29357	22927	76524	70452	31436	26113	91.069	91.1284	89.7674	89.5481	92.3583	92.8561
						t	+2	1607	1257	5131	4539	1031	878	4.98511	4.99622	6.01898	5.7693	3.02906	3.12211
						a	+3	920	702	2719	2885	1311	952	2.85395	2.79025	3.18956	3.66698	3.85169	3.38525
						g	+4	265	219	771	715	207	154	0.822062	0.870464	0.904431	0.908802	0.608162	0.547614
ttctttccgctaataaatgagggtgagccataatgaagtgGcgt	gG	3931103 (+)	kup (b3747)	-213	92.5868	g	-3	0	0	0	0	0	0	0	0	0	0	0	0
						t	-2	0	0	0	0	0	0	0	0	0	0	0	0
						g	-1	64	51	12	15	93	80	39.0244	44.7368	13.3333	14.4231	3.46111	4.01808
						G	+1	99	63	76	87	2487	1844	60.3659	55.2632	84.4444	83.6538	92.5568	92.6168
						c	+2	1	0	2	2	98	64	0.609756	0	2.22222	1.92308	3.64719	3.21447
						g	+3	0	0	0	0	8	3	0	0	0	0	0.29773	0.150678
						t	+4	0	0	0	0	1	0	0	0	0	0	0.0372162	0
gaaccatagacaacatgaatattaatgttactatctggttGaga	tG	3630929 (-)	yhiI (b3487)	-327	92.5513	g	-3	0	0	0	0	0	0	0	0	0	0	0	0
						t	-2	0	0	1	0	0	0	0	0	1.19048	0	0	0
						t	-1	7	6	0	2	0	0	7.21649	7.59494	0	1.85185	0	0
						G	+1	78	56	75	96	405	277	80.4124	70.8861	89.2857	88.8889	91.8367	93.266
						a	+2	6	12	5	8	26	17	6.18557	15.1899	5.95238	7.40741	5.89569	5.72391
						g	+3	2	0	2	0	7	3	2.06186	0	2.38095	0	1.5873	1.0101
						a	+4	4	5	1	2	3	0	4.12371	6.32911	1.19048	1.85185	0.680272	0
ggcctggaacaactgaacttattgaactatgttagaaaatAcgc	tA	1907793 (-)	yobF (b1824)	-202	92.5228	a	-3	0	0	0	0	0	0	0	0	0	0	0	0
						a	-2	1	0	0	0	7	4	0.471698	0	0	0	0.446144	0.310559
						t	-1	23	10	12	3	57	41	10.8491	8.92857	4.56274	3.0303	3.63289	3.18323
						A	+1	184	102	240	94	1444	1198	86.7925	91.0714	91.2548	94.9495	92.0331	93.0124
						c	+2	3	0	10	2	59	38	1.41509	0	3.80228	2.0202	3.76036	2.95031
						g	+3	0	0	1	0	2	5	0	0	0.380228	0	0.12747	0.388199
						c	+4	1	0	0	0	0	2	0.471698	0	0	0	0	0.15528
cggttgacagaggccctcaatccaaacgataaagggtgatGtgt	tG	185976 (-)	dapD (b0166)	-29	92.5189	g	-3	20	16	1	1	1	3	18.3486	24.6154	1.26582	0.990099	0.568182	1.51515
						a	-2	36	10	21	35	5	6	33.0275	15.3846	26.5823	34.6535	2.84091	3.0303
						t	-1	2	1	6	2	1	2	1.83486	1.53846	7.59494	1.9802	0.568182	1.0101
						G	+1	42	30	45	57	163	183	38.5321	46.1538	56.962	56.4356	92.6136	92.4242
						t	+2	7	4	2	3	3	2	6.42202	6.15385	2.53165	2.9703	1.70455	1.0101
						g	+3	1	0	1	0	3	2	0.917431	0	1.26582	0	1.70455	1.0101
						t	+4	1	4	3	3	0	0	0.917431	6.15385	3.79747	2.9703	0	0
tagagttgataagcgttgattctgcccttatttacaaaggGatg	gG	4399398 (+)	miaA (b4171)	146	92.5147	a	-3	0	0	0	0	0	0	0	0	0	0	0	0
						g	-2	5	4	1	0	0	0	0.406174	0.658979	0.171527	0	0	0
						g	-1	624	305	50	99	6	7	50.6905	50.2471	8.57633	10.4984	0.556586	0.937082
						G	+1	522	263	488	767	983	701	42.4045	43.3278	83.705	81.3362	91.1874	93.842
						a	+2	68	31	41	67	74	33	5.52396	5.10708	7.03259	7.10498	6.86456	4.41767
						t	+3	5	1	2	4	6	3	0.406174	0.164745	0.343053	0.424178	0.556586	0.401606
						g	+4	7	3	1	6	9	3	0.568643	0.494234	0.171527	0.636267	0.834879	0.401606
gcaacttgcgctcctgacaatttgtaccatgctttctcctGaat	tG	1930415 (-)	yebF (b1847)	-25	92.4245	c	-3	0	0	0	0	2	3	0	0	0	0	0.507614	0.283554
						c	-2	5	2	0	1	1	3	1.62866	0.913242	0	0.193798	0.253807	0.283554
						t	-1	17	6	11	28	16	39	5.53746	2.73973	4.31373	5.42636	4.06091	3.6862
						G	+1	269	196	226	435	360	989	87.6221	89.4977	88.6275	84.3023	91.3706	93.4783
						a	+2	12	13	18	44	14	19	3.90879	5.93607	7.05882	8.52713	3.5533	1.79584
						a	+3	2	1	0	7	1	3	0.651466	0.456621	0	1.35659	0.253807	0.283554
						t	+4	2	1	0	1	0	2	0.651466	0.456621	0	0.193798	0	0.189036
attaatcatcgttttgtcgggaagcgagtaaacttaaaggAtat	gA	3586920 (+)	yhhA (b3448)	-23	92.3741	a	-3	0	0	0	0	0	0	0	0	0	0	0	0
						g	-2	6	1	1	0	1	0	1.13208	0.285714	0.303951	0	0.0687758	0
						g	-1	28	16	2	3	37	16	5.28302	4.57143	0.607903	1.35135	2.5447	1.49533
						A	+1	467	323	315	208	1326	1001	88.1132	92.2857	95.7447	93.6937	91.1967	93.5514
						t	+2	13	8	7	9	42	24	2.45283	2.28571	2.12766	4.05405	2.88858	2.24299
						a	+3	14	2	3	2	44	27	2.64151	0.571429	0.911854	0.900901	3.02613	2.52336
						t	+4	2	0	1	0	4	2	0.377358	0	0.303951	0	0.275103	0.186916
ctgttacttcccctctactattcccacgttaaaatagggtGttc	tG	479288 (-)	ylaC (b0458)	-37	92.3593	g	-3	8	2	0	5	1	1	3.4632	1.25	0	2.36967	0.125471	0.109051
						g	-2	2	2	1	3	0	0	0.865801	1.25	0.840336	1.4218	0	0
						t	-1	15	11	4	15	0	6	6.49351	6.875	3.36134	7.109	0	0.654308
						G	+1	186	135	101	168	743	839	80.5195	84.375	84.8739	79.6209	93.2246	91.494
						t	+2	6	4	4	7	22	43	2.5974	2.5	3.36134	3.31754	2.76035	4.6892
						t	+3	11	5	9	12	27	26	4.7619	3.125	7.56303	5.6872	3.3877	2.83533
						c	+4	3	1	0	1	4	2	1.2987	0.625	0	0.473934	0.501882	0.218103
acatattgctaaatgtttttacatccactacaaccatatcAtca	cA	243346 (-)	fadE (b0221)	-43	92.326	a	-3	2	1	0	1	7	5	0.706714	0.440529	0	0.37037	1.19658	0.965251
						t	-2	0	0	0	1	0	0	0	0	0	0.37037	0	0
						c	-1	5	0	2	0	3	8	1.76678	0	0.854701	0	0.512821	1.5444
						A	+1	269	213	213	240	537	481	95.053	93.8326	91.0256	88.8889	91.7949	92.8571
						t	+2	2	4	10	15	28	18	0.706714	1.76211	4.2735	5.55556	4.78632	3.4749
						c	+3	1	3	1	1	2	2	0.353357	1.32159	0.42735	0.37037	0.34188	0.3861
						a	+4	4	6	8	12	8	4	1.41343	2.64317	3.4188	4.44444	1.36752	0.772201
aatacccataattataagagaggttgttatgattgaacgtGaac	tG	2590854 (-)	ypfM (b4606)	12	92.322	c	-3	9	4	7	6	0	1	5.05618	4.08163	9.21053	6.74157	0	0.735294
						g	-2	33	16	12	17	5	2	18.5393	16.3265	15.7895	19.1011	2.63158	1.47059
						t	-1	14	7	3	4	2	3	7.86517	7.14286	3.94737	4.49438	1.05263	2.20588
						G	+1	38	32	22	21	172	128	21.3483	32.6531	28.9474	23.5955	90.5263	94.1176
						a	+2	31	14	8	13	4	2	17.4157	14.2857	10.5263	14.6067	2.10526	1.47059
						a	+3	37	17	18	19	3	0	20.7865	17.3469	23.6842	21.3483	1.57895	0
						c	+4	16	8	6	9	4	0	8.98876	8.16327	7.89474	10.1124	2.10526	0
aagtcttcataagcggcaatcgctacgctaggctttttttGagg	tG	1989501 (-)	yecH (b1906)	-11	92.3125	t	-3	1	0	0	0	0	0	0.353357	0	0	0	0	0
						t	-2	1	0	0	0	0	2	0.353357	0	0	0	0	0.13289
						t	-1	9	12	1	0	0	2	3.18021	6.77966	0.609756	0	0	0.13289
						G	+1	236	152	148	148	1340	1382	83.3922	85.8757	90.2439	88.0952	92.7978	91.8272
						a	+2	31	13	11	17	89	96	10.9541	7.34463	6.70732	10.119	6.16343	6.37874
						g	+3	2	0	2	1	11	16	0.706714	0	1.21951	0.595238	0.761773	1.06312
						g	+4	3	0	2	2	4	7	1.06007	0	1.21951	1.19048	0.277008	0.465116
tcgcttgcagttatcgttggcgtccagcactataatggacAatc	cA	2709034 (-)	rseB (b2571)	-280	92.2345	g	-3	2	3	2	3	0	2	1.03627	3.125	1.96078	1.85185	0	0.634921
						a	-2	32	12	16	22	6	5	16.5803	12.5	15.6863	13.5802	1.40845	1.5873
						c	-1	7	0	2	2	6	8	3.62694	0	1.96078	1.23457	1.40845	2.53968
						A	+1	138	73	77	124	395	289	71.5026	76.0417	75.4902	76.5432	92.723	91.746
						a	+2	9	4	2	5	9	9	4.66321	4.16667	1.96078	3.08642	2.11268	2.85714
						t	+3	3	1	2	2	2	0	1.5544	1.04167	1.96078	1.23457	0.469484	0
						c	+4	2	3	1	4	8	2	1.03627	3.125	0.980392	2.46914	1.87793	0.634921
ggggttgacattacaacctctcctttagagcattatgtgtAagg	tA	1809350 (-)	yniB (b1726)	-117	92.2175	t	-3	1	0	1	0	0	0	0.746269	0	1.06383	0	0	0
						g	-2	22	17	14	10	2	2	16.4179	23.6111	14.8936	14.2857	1.52672	2.43902
						t	-1	38	11	2	1	4	2	28.3582	15.2778	2.12766	1.42857	3.05344	2.43902
						A	+1	66	37	74	55	117	78	49.2537	51.3889	78.7234	78.5714	89.313	95.122
						a	+2	2	1	1	1	5	0	1.49254	1.38889	1.06383	1.42857	3.81679	0
						g	+3	0	4	2	1	3	0	0	5.55556	2.12766	1.42857	2.29008	0
						g	+4	5	2	0	2	0	0	3.73134	2.77778	0	2.85714	0	0
ccgggtggtttttttgctgttagcaaccagacttaatggcAgat	cA	403231 (+)	psiF (b0384)	-50	92.2097	g	-3	0	0	0	0	0	0	0	0	0	0	0	0
						g	-2	0	0	0	0	2	2	0	0	0	0	0.246914	0.239521
						c	-1	0	1	1	1	4	6	0	1.21951	1.16279	1.42857	0.493827	0.718563
						A	+1	118	76	81	64	742	775	99.1597	92.6829	94.186	91.4286	91.6049	92.8144
						g	+2	1	4	4	5	59	51	0.840336	4.87805	4.65116	7.14286	7.28395	6.10778
						a	+3	0	1	0	0	2	1	0	1.21951	0	0	0.246914	0.11976
						t	+4	0	0	0	0	1	0	0	0	0	0	0.123457	0
tccattgtctcccctgtaaagctgtgcttgtataaatattGtta	tG	3853016 (-)	ivbL (b3672)	-28	92.1736	a	-3	1	2	0	0	0	0	0.176367	0.465116	0	0	0	0
						t	-2	21	16	2	1	2	1	3.7037	3.72093	0.518135	0.263158	0.0825423	0.0515198
						t	-1	165	105	61	58	146	89	29.1005	24.4186	15.8031	15.2632	6.02559	4.58527
						G	+1	364	287	306	305	2216	1803	64.1975	66.7442	79.2746	80.2632	91.4569	92.8903
						t	+2	11	15	13	11	51	42	1.94004	3.48837	3.36788	2.89474	2.10483	2.16383
						t	+3	1	4	1	4	7	4	0.176367	0.930233	0.259067	1.05263	0.288898	0.206079
						a	+4	4	1	3	1	1	2	0.705467	0.232558	0.777202	0.263158	0.0412712	0.10304
gctttgtcacgagcacacagacggtcttatactgtatgatAacg	tA	2642932 (-)	rodZ (b2516)	-88	92.1158	g	-3	3	2	0	0	0	0	2.05479	2	0	0	0	0
						a	-2	1	1	0	0	0	0	0.684932	1	0	0	0	0
						t	-1	25	21	4	2	1	4	17.1233	21	6.15385	3.50877	0.847458	3.27869
						A	+1	114	74	59	53	111	110	78.0822	74	90.7692	92.9825	94.0678	90.1639
						a	+2	2	1	2	2	3	8	1.36986	1	3.07692	3.50877	2.54237	6.55738
						c	+3	1	1	0	0	2	0	0.684932	1	0	0	1.69492	0
						g	+4	0	0	0	0	1	0	0	0	0	0	0.847458	0
ctggctaacaatgtagcgtccagccccttaccataaaaggAagt	gA	3254297 (+)	yhaK (b3106)	-22	92.0792	a	-3	0	0	0	0	0	0	0	0	0	0	0	0
						g	-2	3	3	0	0	0	0	2.38095	2.9703	0	0	0	0
						g	-1	31	17	5	3	1	1	24.6032	16.8317	6.94444	2.06897	0.990099	0.990099
						A	+1	88	71	55	119	94	92	69.8413	70.297	76.3889	82.069	93.0693	91.0891
						a	+2	3	8	12	21	6	7	2.38095	7.92079	16.6667	14.4828	5.94059	6.93069
						g	+3	1	0	0	0	0	1	0.793651	0	0	0	0	0.990099
						t	+4	0	2	0	2	0	0	0	1.9802	0	1.37931	0	0
tttcattgctgtaattaaccttttaggttataactaaagtAaca	tA	3168562 (-)	mqsR (b3022)	-18	91.9723	a	-3	0	0	0	0	0	0	0	0	0	0	0	0
						g	-2	9	5	2	0	2	3	1.34731	0.957854	0.167364	0	0.16247	0.229358
						t	-1	92	78	3	7	2	2	13.7725	14.9425	0.251046	0.403924	0.16247	0.152905
						A	+1	530	412	1138	1649	1135	1200	79.3413	78.9272	95.2301	95.1529	92.2015	91.7431
						a	+2	22	16	30	52	43	51	3.29341	3.06513	2.51046	3.00058	3.4931	3.89908
						c	+3	10	4	8	10	27	21	1.49701	0.766284	0.669456	0.577034	2.19334	1.6055
						a	+4	5	7	14	15	22	31	0.748503	1.341	1.17155	0.865551	1.78716	2.37003
acaaatcttgccctcccgatgttgtgctatgctttttatcAgcg	cA	1879297 (-)	yeaQ (b1795)	-42	91.9404	a	-3	0	1	0	0	0	0	0	0.0910747	0	0	0	0
						t	-2	19	11	0	0	0	4	1.6696	1.00182	0	0	0	0.155159
						c	-1	63	78	62	32	187	142	5.53603	7.10383	5.27211	4.90798	4.46407	5.50815
						A	+1	1019	984	1069	599	3881	2352	89.5431	89.6175	90.9014	91.8712	92.6474	91.2335
						g	+2	30	21	38	20	99	66	2.6362	1.91257	3.23129	3.06748	2.36333	2.56012
						c	+3	4	2	4	1	16	10	0.351494	0.182149	0.340136	0.153374	0.381953	0.387898
						g	+4	3	1	3	0	6	4	0.26362	0.0910747	0.255102	0	0.143232	0.155159
gatgatttcatcaaactgttaacgtgctacaattgaacttGata	tG	4640595 (-)	arcA (b4401)	-289	91.9054	c	-3	0	1	2	0	0	0	0	0.869565	2	0	0	0
						t	-2	5	5	0	1	0	0	3.28947	4.34783	0	0.892857	0	0
						t	-1	22	21	9	22	43	58	14.4737	18.2609	9	19.6429	4.52156	4.25532
						G	+1	117	78	85	75	871	1257	76.9737	67.8261	85	66.9643	91.5878	92.223
						a	+2	4	6	4	6	27	40	2.63158	5.21739	4	5.35714	2.83912	2.9347
						t	+3	2	1	0	1	0	6	1.31579	0.869565	0	0.892857	0	0.440205
						a	+4	2	3	0	7	10	2	1.31579	2.6087	0	6.25	1.05152	0.146735
acgctgcgattcaaccgctatacctgctatcttcaacttcAgga	cA	2427937 (-)	argT (b2310)	-146	91.8654	t	-3	0	1	0	0	1	0	0	0.0414766	0	0	0.00468011	0
						t	-2	47	26	0	1	1	0	1.47938	1.07839	0	0.0447427	0.00468011	0
						c	-1	187	160	92	96	1001	865	5.88606	6.63625	4.39351	4.2953	4.68479	4.86693
						A	+1	2808	2086	1907	2043	19652	16308	88.3853	86.5201	91.0697	91.4094	91.9736	91.7572
						g	+2	93	65	58	58	590	482	2.92729	2.69598	2.76982	2.59508	2.76127	2.71198
						g	+3	20	45	19	19	85	85	0.629525	1.86645	0.907354	0.850112	0.39781	0.478254
						a	+4	22	28	18	18	37	33	0.692477	1.16134	0.859599	0.805369	0.173164	0.185675
cggatggcgaaaaagcggtgaatgatggcaaactagcagcGact	cG	3937045 (+)	rbsK (b3752)	-249	91.8475	a	-3	0	0	3	1	0	1	0	0	0.250627	0.0718391	0	0.0650195
						g	-2	0	1	2	2	0	0	0	0.209644	0.167084	0.143678	0	0
						c	-1	4	0	1	2	3	2	0.682594	0	0.0835422	0.143678	0.0791557	0.130039
						G	+1	515	418	1078	1291	3485	1411	87.884	87.631	90.0585	92.7443	91.9525	91.7425
						a	+2	56	51	93	86	268	115	9.55631	10.6918	7.76942	6.17816	7.07124	7.47724
						c	+3	10	6	15	7	22	5	1.70648	1.25786	1.25313	0.502874	0.580475	0.325098
						t	+4	1	1	5	3	12	4	0.170648	0.209644	0.417711	0.215517	0.316623	0.260078
tcatgtttacagtaatgtaaccttcccgtaaaatgcccacAcac	cA	451653 (-)	cyoA (b0432)	-43	91.8261	c	-3	0	0	0	1	0	1	0	0	0	0.606061	0	0.763359
						a	-2	3	2	4	4	4	1	3	3.07692	3.00752	2.42424	2.40964	0.763359
						c	-1	0	0	0	0	2	2	0	0	0	0	1.20482	1.52672
						A	+1	89	60	117	138	149	123	89	92.3077	87.9699	83.6364	89.759	93.8931
						c	+2	2	3	6	15	6	1	2	4.61538	4.51128	9.09091	3.61446	0.763359
						a	+3	3	0	3	3	5	2	3	0	2.25564	1.81818	3.01205	1.52672
						c	+4	3	0	3	4	0	1	3	0	2.25564	2.42424	0	0.763359
tgcgctatctctgtggcaggattgtgaataaagtgtcaacAagc	cA	1482904 (-)	azoR (b1412)	-44	91.7938	a	-3	0	0	0	0	0	0	0	0	0	0	0	0
						a	-2	0	0	0	0	0	0	0	0	0	0	0	0
						c	-1	0	0	0	0	0	0	0	0	0	0	0	0
						A	+1	93	70	68	111	91	140	90.2913	98.5915	90.6667	87.4016	88.3495	95.2381
						a	+2	6	0	5	16	8	5	5.82524	0	6.66667	12.5984	7.76699	3.40136
						g	+3	0	0	1	0	2	2	0	0	1.33333	0	1.94175	1.36054
						c	+4	4	1	1	0	2	0	3.8835	1.40845	1.33333	0	1.94175	0
attgtcgcgaaaaacgagatctctcctacaatttctaactGtaa	tG	785462 (-)	ybgS (b0753)	-145	91.7845	a	-3	0	2	0	0	0	1	0	0.461894	0	0	0	0.022748
						c	-2	4	4	0	2	1	1	0.658979	0.923788	0	0.930233	0.02035	0.022748
						t	-1	74	61	31	18	319	246	12.1911	14.0878	9.5092	8.37209	6.49166	5.596
						G	+1	514	346	288	184	4471	4070	84.6787	79.9076	88.3436	85.5814	90.9849	92.5842
						t	+2	15	17	5	6	112	69	2.47117	3.9261	1.53374	2.7907	2.2792	1.56961
						a	+3	0	3	2	5	8	9	0	0.692841	0.613497	2.32558	0.1628	0.204732
						a	+4	0	0	0	0	3	0	0	0	0	0	0.0610501	0
accattgactggctgaatggtctgtcatactttgttacctGcaa	tG	3238374 (+)	alx (b3088)	-206	91.7651	c	-3	0	0	0	0	0	0	0	0	0	0	0	0
						c	-2	2	1	1	0	0	0	3.38983	1.5625	1.44928	0	0	0
						t	-1	10	17	13	16	9	9	16.9492	26.5625	18.8406	12.9032	3.48837	4.61538
						G	+1	42	44	47	104	238	178	71.1864	68.75	68.1159	83.871	92.2481	91.2821
						c	+2	3	2	7	3	10	5	5.08475	3.125	10.1449	2.41935	3.87597	2.5641
						a	+3	0	0	1	0	0	1	0	0	1.44928	0	0	0.512821
						a	+4	2	0	0	1	1	2	3.38983	0	0	0.806452	0.387597	1.02564
ttaacggcgttgttttcgcgctggcctataatggtaacctGacg	tG	2637852 (-)	der (b2511)	-496	91.7403	c	-3	1	4	0	0	0	1	0.3367	1.32013	0	0	0	0.0221435
						c	-2	7	6	5	0	38	68	2.3569	1.9802	1.76056	0	1.10337	1.50576
						t	-1	16	16	14	15	145	147	5.38721	5.28053	4.92958	6.09756	4.21022	3.25509
						G	+1	261	262	251	225	3158	4145	87.8788	86.4686	88.3803	91.4634	91.6957	91.7848
						a	+2	12	15	13	5	89	138	4.0404	4.9505	4.57746	2.03252	2.5842	3.0558
						c	+3	0	0	0	1	6	16	0	0	0	0.406504	0.174216	0.354296
						g	+4	0	0	1	0	8	1	0	0	0.352113	0	0.232288	0.0221435
ttagcttcaccacggtatattgtttccgtagaatacccatAatt	tA	2590885 (-)	ypfM (b4606)	-19	91.6291	c	-3	0	0	0	0	3	0	0	0	0	0	2.17391	0
						a	-2	0	0	2	0	1	0	0	0	1.76991	0	0.724638	0
						t	-1	32	14	0	0	0	0	16.6667	15.3846	0	0	0	0
						A	+1	143	72	99	95	126	80	74.4792	79.1209	87.6106	94.0594	91.3043	91.954
						a	+2	14	2	9	5	7	6	7.29167	2.1978	7.9646	4.9505	5.07246	6.89655
						t	+3	2	1	2	0	0	1	1.04167	1.0989	1.76991	0	0	1.14943
						t	+4	1	2	1	1	1	0	0.520833	2.1978	0.884956	0.990099	0.724638	0
catcttgacgtctgctttacgggcggttaaggtgcctcttGtgc	tG	983023 (+)	ycbK (b0926)	-52	91.5832	c	-3	0	0	0	0	0	1	0	0	0	0	0	0.0255102
						t	-2	8	5	1	4	8	8	3.26531	2.47525	0.211864	0.542005	0.218878	0.204082
						t	-1	31	24	43	85	186	227	12.6531	11.8812	9.11017	11.5176	5.08892	5.79082
						G	+1	199	163	417	623	3367	3569	81.2245	80.6931	88.3475	84.4173	92.1204	91.0459
						t	+2	6	7	10	22	86	100	2.44898	3.46535	2.11864	2.98103	2.35294	2.55102
						g	+3	0	2	1	2	7	11	0	0.990099	0.211864	0.271003	0.191518	0.280612
						c	+4	1	1	0	2	1	4	0.408163	0.49505	0	0.271003	0.0273598	0.102041
acaggtgttcactggaactattctcagttacgctggagagGtat	gG	3043184 (-)	yqfA (b2899)	-36	91.5819	g	-3	0	0	0	0	0	0	0	0	0	0	0	0
						a	-2	0	1	1	1	0	0	0	0.724638	0.348432	0.338983	0	0
						g	-1	65	22	9	3	3	2	14.574	15.942	3.13589	1.01695	0.169014	0.0931966
						G	+1	312	94	247	254	1630	1960	69.9552	68.1159	86.0627	86.1017	91.831	91.3327
						t	+2	8	3	10	9	47	57	1.79372	2.17391	3.48432	3.05085	2.64789	2.6561
						a	+3	60	18	20	23	90	125	13.4529	13.0435	6.96864	7.79661	5.07042	5.82479
						t	+4	1	0	0	5	5	2	0.224215	0	0	1.69492	0.28169	0.0931966
aaacacttgaaagtgtaatttccgtccccatatactaagcAtca	cA	662706 (-)	ybeD (b0631)	-64	91.5264	a	-3	0	0	0	0	0	0	0	0	0	0	0	0
						g	-2	0	0	0	0	0	0	0	0	0	0	0	0
						c	-1	6	6	2	1	1	0	1.28205	1.89873	0.255754	0.0727273	0.130719	0
						A	+1	386	265	705	1255	714	576	82.4786	83.8608	90.1535	91.2727	93.3333	89.7196
						t	+2	20	15	14	32	15	29	4.2735	4.74684	1.79028	2.32727	1.96078	4.51713
						c	+3	34	14	35	35	24	26	7.26496	4.43038	4.4757	2.54545	3.13725	4.04984
						a	+4	22	16	26	52	11	11	4.70085	5.06329	3.32481	3.78182	1.43791	1.7134
cgggcttgaaaaagcgcccaatgtattccaggcttatctaAcac	aA	1822283 (-)	osmE (b1739)	-27	91.4464	c	-3	0	0	0	1	0	0	0	0	0	0.0668896	0	0
						t	-2	17	6	0	0	0	2	1.11257	0.634249	0	0	0	0.0366435
						a	-1	93	62	49	75	66	220	6.08639	6.55391	4.73888	5.01672	3.54839	4.03078
						A	+1	1362	856	843	1151	1703	4985	89.1361	90.4863	81.528	76.99	91.5591	91.3338
						c	+2	44	20	121	243	61	166	2.87958	2.11416	11.7021	16.2542	3.27957	3.04141
						a	+3	7	1	18	24	18	63	0.458115	0.105708	1.74081	1.60535	0.967742	1.15427
						c	+4	5	1	3	1	12	22	0.327225	0.105708	0.290135	0.0668896	0.645161	0.403078
aggctttacactttatgcttccggctcgtatgttgtgtggAatt	gA	366343 (-)	lacZ (b0344)	-38	91.3252	t	-3	35106	16110	160	149	519	869	26.6587	27.1972	0.307002	0.20689	0.690224	1.2444
						g	-2	22000	11018	2173	4210	937	1025	16.7063	18.6008	4.16946	5.84568	1.24613	1.46779
						g	-1	22600	9070	1414	2162	1793	1915	17.1619	15.3122	2.71313	3.00199	2.38453	2.74226
						A	+1	49076	21703	45877	62249	69130	63348	37.2672	36.6394	88.0269	86.4341	91.9367	90.7136
						a	+2	2108	918	2053	2639	2254	2096	1.60077	1.54979	3.93921	3.66431	2.99762	3.00145
						t	+3	411	219	242	344	235	263	0.312104	0.36972	0.46434	0.477652	0.312529	0.376613
						t	+4	386	196	198	266	325	317	0.293119	0.330891	0.379914	0.369347	0.432221	0.45394
gactattccttggggtgctcttgacagctatttttgatatGatt	tG	3737250 (-)	bax (b3570)	-73	91.2842	t	-3	0	1	2	0	0	0	0	0.632911	1.94175	0	0	0
						a	-2	0	0	0	1	4	7	0	0	0	0.917431	0.251414	0.570497
						t	-1	0	0	0	0	0	0	0	0	0	0	0	0
						G	+1	215	137	93	99	1455	1118	88.1148	86.7089	90.2913	90.8257	91.4519	91.1165
						a	+2	25	18	7	9	112	91	10.2459	11.3924	6.79612	8.25688	7.0396	7.41646
						t	+3	4	1	1	0	17	9	1.63934	0.632911	0.970874	0	1.06851	0.733496
						t	+4	0	1	0	0	3	2	0	0.632911	0	0	0.188561	0.162999
gcttactgaaaaaattaacatctcttgctaagcttattaaAggc	aA	1689794 (+)	ydgA (b1614)	-58	91.2123	t	-3	0	0	0	0	0	0	0	0	0	0	0	0
						a	-2	1	5	2	2	2	1	0.172414	1.5625	0.813008	1.25786	0.520833	0.340136
						a	-1	6	10	7	3	9	8	1.03448	3.125	2.84553	1.88679	2.34375	2.72109
						A	+1	520	261	218	139	357	263	89.6552	81.5625	88.6179	87.4214	92.9688	89.4558
						g	+2	15	11	12	4	15	18	2.58621	3.4375	4.87805	2.51572	3.90625	6.12245
						g	+3	7	8	2	5	1	2	1.2069	2.5	0.813008	3.14465	0.260417	0.680272
						c	+4	31	25	5	6	0	2	5.34483	7.8125	2.03252	3.77358	0	0.680272
atccgcagcaatattttgtttatcctgtattttcagagggAatg	gA	2544664 (-)	ucpA (b2426)	-41	90.9746	g	-3	1	2	0	0	7	4	0.141044	0.514139	0	0	0.512445	0.208008
						g	-2	15	10	4	9	2	4	2.11566	2.57069	0.630915	1.00111	0.146413	0.208008
						g	-1	77	40	60	72	49	86	10.8604	10.2828	9.46372	8.0089	3.58712	4.47218
						A	+1	587	320	542	788	1248	1742	82.7927	82.2622	85.489	87.6529	91.3616	90.5876
						a	+2	26	15	25	21	49	74	3.66714	3.85604	3.94322	2.33593	3.58712	3.84815
						t	+3	2	1	3	7	9	9	0.282087	0.257069	0.473186	0.778643	0.658858	0.468019
						g	+4	1	1	0	2	2	4	0.141044	0.257069	0	0.222469	0.146413	0.208008
ttatcaaatcgttacgcgatgtttgtgttatctttaatatTcac	tT	1335781 (+)	acnA (b1276)	-50	90.9279	t	-3	1	0	0	0	0	0	0.8	0	0	0	0	0
						a	-2	0	2	0	0	0	0	0	2	0	0	0	0
						t	-1	6	3	3	1	0	0	4.8	3	4.61538	1.88679	0	0
						T	+1	114	94	56	47	152	216	91.2	94	86.1538	88.6792	89.9408	91.9149
						c	+2	4	1	4	4	16	17	3.2	1	6.15385	7.54717	9.46746	7.23404
						a	+3	0	0	2	1	1	2	0	0	3.07692	1.88679	0.591716	0.851064
						c	+4	0	0	0	0	0	0	0	0	0	0	0	0
gggtgttgtaaggggatggctggcctgatataactgctgcGcgt	cG	461395 (+)	hupB (b0440)	-56	90.9125	t	-3	1	0	3	2	3	0	0.271003	0	0.350058	0.205339	0.212615	0
						g	-2	2	0	11	8	16	13	0.542005	0	1.28355	0.821355	1.13395	1.00077
						c	-1	30	37	8	21	4	2	8.13008	14.3969	0.933489	2.15606	0.283487	0.153965
						G	+1	285	176	778	868	1261	1201	77.2358	68.4825	90.7818	89.117	89.3692	92.4557
						c	+2	27	23	29	28	29	34	7.31707	8.94942	3.3839	2.87474	2.05528	2.6174
						g	+3	10	8	24	33	93	48	2.71003	3.11284	2.80047	3.38809	6.59107	3.69515
						t	+4	14	13	4	14	5	1	3.79404	5.05837	0.466744	1.43737	0.354359	0.0769823
ttgccttgcaagtggtccgtggattgcatattgtcccgttAgtg	tA	1272424 (+)	chaC (b1218)	-83	90.6171	g	-3	0	0	0	0	2	0	0	0	0	0	0.1386	0
						t	-2	0	0	0	1	0	0	0	0	0	0.244499	0	0
						t	-1	130	56	3	0	0	3	27.0833	22.8571	0.977199	0	0	0.212014
						A	+1	313	172	290	370	1316	1274	65.2083	70.2041	94.4625	90.4645	91.1989	90.0353
						g	+2	28	5	12	24	114	123	5.83333	2.04082	3.90879	5.86797	7.90021	8.69258
						t	+3	9	12	2	12	10	10	1.875	4.89796	0.651466	2.93399	0.693001	0.706714
						g	+4	0	0	0	2	1	5	0	0	0	0.488998	0.0693001	0.353357
ccgtcttgcgataacaggtcgctacgagtagaatactgccGctt	cG	3311786 (-)	rpsO (b3165)	-102	90.53	g	-3	0	0	0	0	0	0	0	0	0	0	0	0
						c	-2	0	0	0	0	0	0	0	0	0	0	0	0
						c	-1	1	1	0	0	0	1	0.555556	0.78125	0	0	0	0.043956
						G	+1	155	103	245	313	1957	2022	86.1111	80.4688	88.7681	88.169	92.1809	88.8791
						c	+2	7	8	5	11	52	70	3.88889	6.25	1.81159	3.09859	2.44936	3.07692
						t	+3	11	8	22	27	101	156	6.11111	6.25	7.97101	7.60563	4.75742	6.85714
						t	+4	6	8	4	4	13	26	3.33333	6.25	1.44928	1.12676	0.612341	1.14286
gtggagagcatggtaaccccaatggattaaaatagatggcGgaa	cG	3613637 (-)	yhhS (b3473)	-1904	90.4917	g	-3	4	8	8	13	7	6	4.93827	10.5263	9.87654	12.037	3.91061	3.97351
						g	-2	4	1	0	1	6	0	4.93827	1.31579	0	0.925926	3.35196	0
						c	-1	4	4	3	1	4	2	4.93827	5.26316	3.7037	0.925926	2.23464	1.3245
						G	+1	69	57	67	90	158	140	85.1852	75	82.716	83.3333	88.2682	92.7152
						g	+2	0	4	2	2	2	1	0	5.26316	2.46914	1.85185	1.11732	0.662252
						a	+3	0	0	0	0	2	1	0	0	0	0	1.11732	0.662252
						a	+4	0	2	1	1	0	1	0	2.63158	1.23457	0.925926	0	0.662252
tggtgatttccgggaacaatttaatgataaacttcatggcGgca	cG	441545 (-)	xseB (b0422)	-202	90.4512	g	-3	10	5	4	5	16	11	11.1111	7.14286	4.25532	6.66667	1.94647	1.55367
						g	-2	2	1	0	4	24	21	2.22222	1.42857	0	5.33333	2.91971	2.9661
						c	-1	1	2	6	2	11	13	1.11111	2.85714	6.38298	2.66667	1.3382	1.83616
						G	+1	74	62	81	60	737	646	82.2222	88.5714	86.1702	80	89.6594	91.2429
						g	+2	3	0	1	4	34	16	3.33333	0	1.06383	5.33333	4.13625	2.25989
						c	+3	0	0	2	0	0	1	0	0	2.12766	0	0	0.141243
						a	+4	0	0	0	0	0	0	0	0	0	0	0	0
cgggttgacatgtcttaccaaaaggtagaacttatacgccAtct	cA	4551521 (+)	uxuA (b4322)	-115	90.4369	g	-3	0	1	0	0	0	0	0	0.220264	0	0	0	0
						c	-2	6	4	0	0	0	0	1.2987	0.881057	0	0	0	0
						c	-1	36	39	48	76	146	118	7.79221	8.59031	8.57143	9.38272	6.57362	6.91271
						A	+1	399	397	499	720	2020	1535	86.3636	87.4449	89.1071	88.8889	90.95	89.9238
						t	+2	19	9	9	9	47	42	4.11255	1.98238	1.60714	1.11111	2.11616	2.46046
						c	+3	1	4	3	4	6	9	0.21645	0.881057	0.535714	0.493827	0.270149	0.527241
						t	+4	1	0	1	1	2	3	0.21645	0	0.178571	0.123457	0.0900495	0.175747
tttgcgagttgaagaaaatgacttcgcttataataccactGtag	tG	2288318 (-)	insH1 (b2192)	1763	90.3274	a	-3	0	0	0	0	0	0	0	0	0	0	0	0
						c	-2	1	0	1	0	0	0	0.26178	0	0.253165	0	0	0
						t	-1	107	42	26	22	1	0	28.0105	19.3548	6.58228	5.41872	0.469484	0
						G	+1	224	133	330	332	190	214	58.6387	61.2903	83.5443	81.7734	89.2019	91.453
						t	+2	13	9	13	29	5	6	3.40314	4.14747	3.29114	7.14286	2.34742	2.5641
						a	+3	29	28	12	18	12	11	7.59162	12.9032	3.03797	4.4335	5.6338	4.70085
						g	+4	8	5	13	5	5	3	2.09424	2.30415	3.29114	1.23153	2.34742	1.28205
acgactatcaattcgacgtcgttttgatattattatgcgcAgat	cA	3152016 (-)	exbB (b3006)	-32	90.1958	c	-3	0	0	0	0	0	0	0	0	0	0	0	0
						g	-2	2	1	0	0	2	1	1.69492	1.42857	0	0	1.72414	0.847458
						c	-1	3	1	2	1	2	5	2.54237	1.42857	1.34228	0.440529	1.72414	4.23729
						A	+1	103	66	132	208	108	103	87.2881	94.2857	88.5906	91.63	93.1034	87.2881
						g	+2	1	1	5	11	4	8	0.847458	1.42857	3.3557	4.84581	3.44828	6.77966
						a	+3	5	0	5	1	0	1	4.23729	0	3.3557	0.440529	0	0.847458
						t	+4	4	1	5	6	0	0	3.38983	1.42857	3.3557	2.64317	0	0
cccctttaaaaattcggtgaatacccttacttattggtatActg	tA	1121029 (-)	bssS (b1060)	-74	90.0787	t	-3	17	13	2	8	1	0	4.56989	4.11392	0.167084	0.412371	0.0642674	0
						a	-2	8	12	35	55	47	58	2.15054	3.79747	2.92398	2.83505	3.02057	4.01384
						t	-1	180	148	72	110	55	57	48.3871	46.8354	6.01504	5.6701	3.5347	3.94464
						A	+1	164	138	1059	1711	1412	1292	44.086	43.6709	88.4712	88.1959	90.7455	89.4118
						c	+2	1	4	23	45	34	34	0.268817	1.26582	1.92147	2.31959	2.18509	2.35294
						t	+3	1	1	2	6	3	2	0.268817	0.316456	0.167084	0.309278	0.192802	0.138408
						g	+4	1	0	4	5	4	2	0.268817	0	0.334169	0.257732	0.257069	0.138408
tcgcttcaatttcgaccagccatcctctattctgatgggtAttt	tA	3179717 (+)	ygiB (b3037)	-27	90.0445	g	-3	4	0	0	0	0	0	2.68456	0	0	0	0	0
						g	-2	1	2	0	2	0	1	0.671141	1.69492	0	0.843882	0	0.353357
						t	-1	50	27	1	10	7	8	33.557	22.8814	0.675676	4.21941	5.18519	2.82686
						A	+1	87	81	137	215	121	256	58.3893	68.6441	92.5676	90.7173	89.6296	90.4594
						t	+2	1	4	7	7	5	4	0.671141	3.38983	4.72973	2.95359	3.7037	1.41343
						t	+3	6	3	3	3	1	6	4.02685	2.54237	2.02703	1.26582	0.740741	2.12014
						t	+4	0	1	0	0	1	8	0	0.847458	0	0	0.740741	2.82686
ttgcttgcactagaccgactggtctactacactccaacgcAtga	cA	1726023 (+)	nemR (b1649)	0	90.0377	c	-3	1	0	0	0	0	0	0.355872	0	0	0	0	0
						g	-2	2	0	0	0	0	0	0.711744	0	0	0	0	0
						c	-1	2	0	0	1	0	1	0.711744	0	0	0.588235	0	0.636943
						A	+1	262	108	151	161	121	142	93.2384	87.8049	96.7949	94.7059	89.6296	90.4459
						t	+2	7	2	0	5	4	5	2.4911	1.62602	0	2.94118	2.96296	3.18471
						g	+3	4	6	1	2	10	8	1.42349	4.87805	0.641026	1.17647	7.40741	5.09554
						a	+4	3	7	4	1	0	1	1.06762	5.69106	2.5641	0.588235	0	0.636943
tctagagggtattaataatgaaagctactaaactggtactGggc	tG	1757444 (+)	lpp (b1677)	23	90.0303	a	-3	0	1	2	3	2	1	0	0.806452	2.1978	5.26316	0.218103	0.156495
						c	-2	0	0	0	1	2	1	0	0	0	1.75439	0.218103	0.156495
						t	-1	4	0	0	0	4	1	2.66667	0	0	0	0.436205	0.156495
						G	+1	107	64	67	34	826	575	71.3333	51.6129	73.6264	59.6491	90.0763	89.9844
						g	+2	19	28	13	3	67	47	12.6667	22.5806	14.2857	5.26316	7.30643	7.35524
						g	+3	14	23	4	9	13	13	9.33333	18.5484	4.3956	15.7895	1.41767	2.03443
						c	+4	6	8	5	7	3	1	4	6.45161	5.49451	12.2807	0.327154	0.156495
tgctgttgcgtcgcaaccgacaattacgtattctgagtctTcgg	tT	2868117 (-)	rpoS (b2741)	-566	89.9956	t	-3	0	1	0	1	0	0	0	0.21322	0	0.196078	0	0
						c	-2	18	10	8	5	8	3	2.59366	2.1322	1.67715	0.980392	0.273131	0.0944882
						t	-1	251	186	10	7	16	15	36.1671	39.6588	2.09644	1.37255	0.546262	0.472441
						T	+1	378	238	396	415	2628	2866	54.4669	50.7463	83.0189	81.3725	89.7235	90.2677
						c	+2	22	9	29	25	113	135	3.17003	1.91898	6.07966	4.90196	3.85797	4.25197
						g	+3	19	17	28	47	153	144	2.73775	3.62473	5.87002	9.21569	5.22363	4.53543
						g	+4	6	8	6	10	11	12	0.864553	1.70576	1.25786	1.96078	0.375555	0.377953
atcgcagccggagtggcgcaatccctgcaatacttaaatcGgta	cG	3219459 (+)	patA (b3073)	-35	89.9691	a	-3	0	0	0	0	0	0	0	0	0	0	0	0
						t	-2	0	0	0	0	0	0	0	0	0	0	0	0
						c	-1	0	1	0	0	1	0	0	1.35135	0	0	0.0909918	0
						G	+1	147	62	67	68	990	1187	92.4528	83.7838	88.1579	93.1507	90.0819	89.8562
						g	+2	12	10	9	4	105	130	7.54717	13.5135	11.8421	5.47945	9.55414	9.84103
						t	+3	0	1	0	0	1	2	0	1.35135	0	0	0.0909918	0.1514
						a	+4	0	0	0	1	2	2	0	0	0	1.36986	0.181984	0.1514
[truncated: 812 more rows]
